# Supplementary material for: Visible-light-mediated synthesis of 3,4,5-trisubstituted furan-2-one derivativesviaa bifunctional organo photocatalyst
Source: Royal Society of Chemistry journal article supplement (doi:10.1039/d1nj03238k), 2021-01-01
Supplement: d1nj03238k1.pdf [file d1nj03238k1.pdf]

*Electronic Supplementary Information (ESI)*

**Visible-light-mediated synthesis of 3,4,5-trisubstituted furan-2-one derivative  
via bifunctional based Organo photocatalyst**

Arup Dutta, Sumit Kumar Patra, Snehadrinarayan Khatua and Rishanlang Nongkhlaw\*

---

Department of Chemistry, North-Eastern Hill University, Shillong, Meghalaya-793022 (INDIA)

\*Corresponding author E-mail address: rlnongkhlaw@gmail.com

---

**Index of Contents**

|                                                                                                                               |         |
|-------------------------------------------------------------------------------------------------------------------------------|---------|
| Index of Contents.....                                                                                                        | S1      |
| I. Experimental Section .....                                                                                                 | S2      |
| I-1. General procedure for the synthesis 3,4,5-trisubstituted furan-2(5H)-one derivative.....                                 | S2      |
| I-2. General procedure for the synthesis of 1-(1H-benzo[d]imidazol-2-yl)-3-(4-nitrophenyl) thiourea (BINPT).....              | S3      |
| I-3. General procedure for the synthesis of 1-(4-methylbenzo[d]thiazol-2-yl)-3-(4-nitrophenyl) thiourea (MBNPT).....          | S3      |
| II. Mechanistic Investigation with UV-Vis Absorption Spectra.....                                                             | S4      |
| III. Light ON-OFF Experiments.....                                                                                            | S5      |
| IV. Comparative study of Ecoscale.....                                                                                        | S6      |
| V. Computational Details (Optimized geometries, FMO and the energies of molecule).....                                        | S7-S15  |
| VI. UV-Visible Spectra of Catalyst.....                                                                                       | S16     |
| VII. Photoluminescence (PL) spectra of catalyst.....                                                                          | S17     |
| VIII. Calculated molecular orbital amplitude plot of HOMO and LUMO levels and optimized molecular structure of compounds..... | S18-S19 |
| IX. Electrochemical data of compounds (Theoretical).....                                                                      | S19     |
| X. Analytical and spectroscopic data of the synthesized compounds.....                                                        | S19-S25 |
| XI. <sup>1</sup> H & <sup>13</sup> C NMR spectra of the synthesized compounds.....                                            | S26-S50 |
| XII. Mass spectrum of synthesized compound .....                                                                              | S51-S55 |
| XIII. References (cited in SI).....                                                                                           | S56     |

## I. Experimental Section

All the chemicals were procured from Alfa Aesar, Sigma-Aldrich & Merck and were used without any further purification. The purity of the synthesized compounds was confirmed by FT-IR,  $^1\text{H-NMR}$ ,  $^{13}\text{C-NMR}$  and Mass spectrometry. All reactions were monitored by thin-layer chromatography (TLC) using precoated aluminum sheets (silica gel 60 F 254 0.2 mm thickness) and developed in an iodine chamber. Melting points were recorded in the capillary using a Thermo Scientific 9300 apparatus. FT-IR spectra were recorded in KBr pellets on a BrukerAvance 400 (Model: ALPHA II). FT-IR instrument and the frequencies are expressed in  $\text{cm}^{-1}$ .  $^1\text{H-NMR}$  and  $^{13}\text{C-NMR}$  spectra were recorded on a BrukerAvance II-400 spectrometer in  $\text{CDCl}_3$  and  $\text{DMSO-d}_6$  (chemical shifts in  $\delta$ ). Mass spectral data of the representative compounds were recorded with a Waters ZQ-4000 (ESI) mass spectrometer. For the UV-visible absorption studies, we have used spectroscopic grade ethanol solvents. All the electronic structure calculations were carried out using Gaussian 09 suite of program. The geometries of the compounds were optimized using the Density Functional Theory (DFT) based B3LYP method in conjugation with 6-31G(d,p) basis set.

### I. 1. General procedure for the synthesis 3,4,5-trisubstituted furan-2-one derivatives

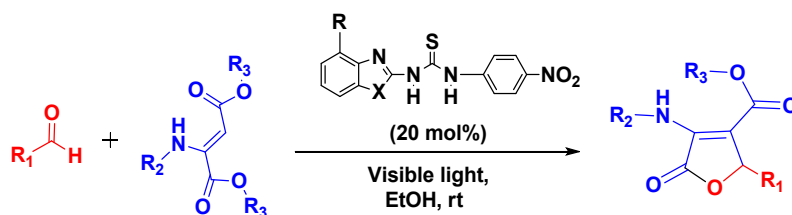

A mixture of diethyl 2-(phenylamino) fumarate (1 mmol), aldehydes (1mmol) and photocatalyst in 5 ml of ethanol was taken in a glass vial with screw cap and stirred at room temperature under the irradiation of white LEDs for 60-90 minutes. Upon completion of the reaction (monitored by TLC) the mixture was filtered and washed many times with de-ionized water. The solid product obtained was purified by recrystallization from hot ethanol or column chromatography.

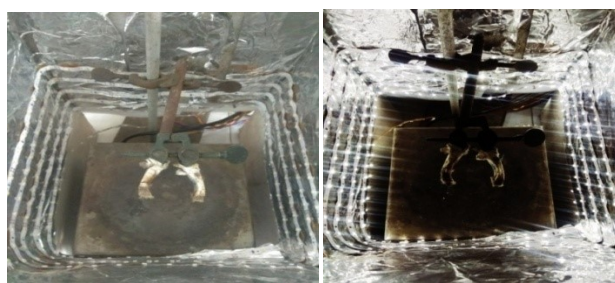

**Figure S1.** Homemade visible-light photo reactor

**I. 2. General procedure for the synthesis of 1-(1H-benzo[d]imidazol-2-yl)-3-(4-nitrophenyl) thiourea (BINPT),<sup>S1</sup> 3a**

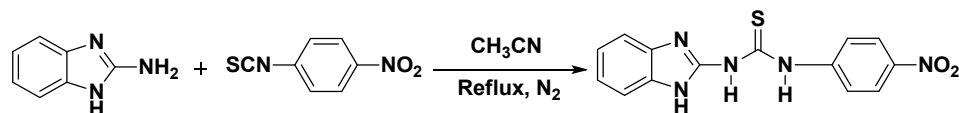

**Scheme S4A.** Synthesis of **3a**

Synthesis of 2-(4-naphthalen-1-yl-phenyl)-2H-[1,2,3] triazole-4-carbaldehyde is shown in Scheme S4A. A mixture of 2-amino benzimidazole (2.00 mmol) and 4-nitrophenyl isothiocyanate (2.20 mmol) was refluxed in dry CH<sub>3</sub>CN under N<sub>2</sub> for 3 h. A greenish yellow precipitate appeared after 30 mins and the reaction was continued to 3 hours to complete the conversion. The precipitate was collected by filtration, washed with CH<sub>3</sub>CN and diethyl ether thoroughly and dried under vacuum.

**I. 3. General procedure for the synthesis of 1-(4-methylbenzo[d]thiazol-2-yl)-3-(4-nitrophenyl) thiourea (MBNPT),<sup>S13b</sup>**

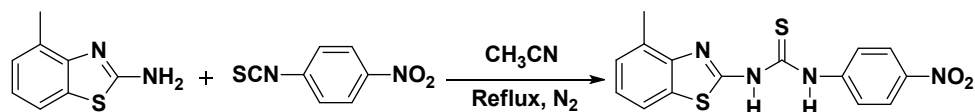

**Scheme S4B.** Synthesis of **3b**

The synthetic route of 1-(4-methylbenzo[d]thiazol-2-yl)-3-(4-nitrophenyl) thiourea is shown in Scheme S4B. A mixture of 2-amino-4-methylbenzothiazole (2.00 mmol) and 4-nitrophenyl isothiocyanate (2.20 mmol) was dissolved in 15 ml of dry CH<sub>3</sub>CN and refluxed for 3 hours under nitrogen atmosphere. An off-white precipitate appeared after 30 mins and the reaction was continued for 3 hours. The precipitate was collected by filtration and washed thoroughly with CH<sub>3</sub>CN and diethyl ether and then dried under vacuum.

## II. Mechanistic Investigation with UV-Vis Absorption Spectra:

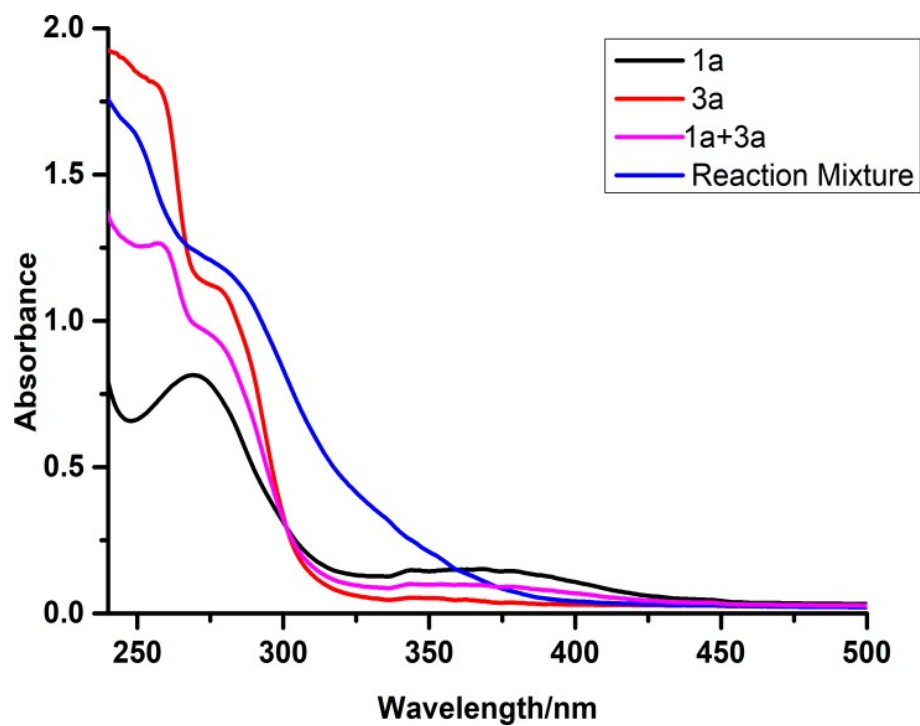

**Figure S2:** UV-Vis absorbance of benzaldehyde (**1a**) ( $1 \times 10^{-5}$  M) in EtOH, benzaldehyde (**1a**) ( $1 \times 10^{-5}$  M) and BINPT (**3a**) ( $1 \times 10^{-5}$  M) in EtOH, and the reaction mixture ( $1 \times 10^{-5}$  M) in EtOH

### III. Light ON-OFF Experiments

In a glass vial with a screw cap containing benzaldehyde 1a (1mmol), diethyl 2-(phenylamino) fumarate 2a (1 mmol) and BINPT, 3a (20 mol%) in 5 ml of ethanol. The mixture was stirred at room temperature for 5 min and then the visible light source was switched on. The mixture was stirred under visible light irradiation for 15 min and then one of the reaction vials were taken out, the mixture was filtered and washed many times with de-ionized water, and the solid product obtained was purified by recrystallization from hot ethanol and yield was calculated. The visible light was then switched off and the vials were stirred in the dark for 15 min followed by which one of the vials was removed and workup for the reaction mixture to isolate the desired product and yield was calculated. This process was repeated till the maximum yield was obtained.

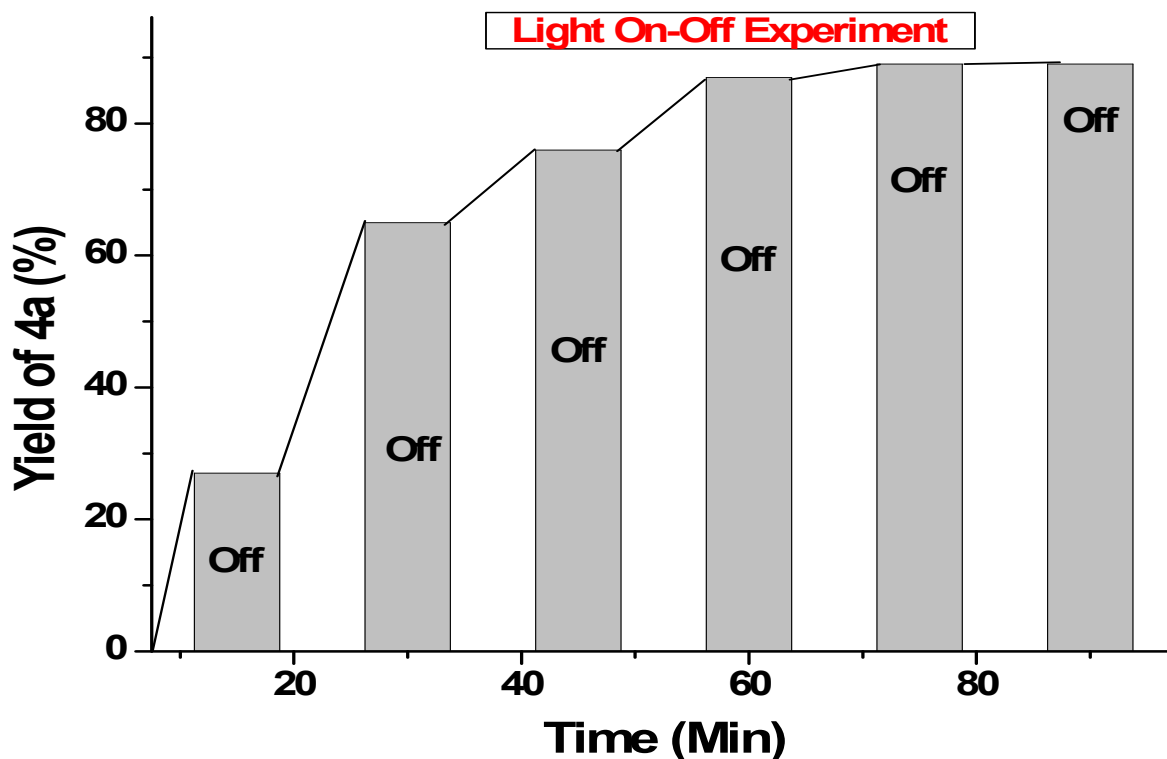

Figure S3. Light ON-OFF Experiment under the optimized condition

#### IV. Comparative study of Ecoscale

**Table S1.** comparative study of Ecoscale<sup>S2</sup> based for the synthesis of **4a** between **3a** (visible light) and sulfonic acid protocol.

| Parameter                                            |                                     | Penalty points     |                 |
|------------------------------------------------------|-------------------------------------|--------------------|-----------------|
|                                                      |                                     | 3a (Visible light) | sulfonic acid   |
| Yield                                                |                                     | 3                  | 19.5            |
| Price of reaction components<br>Inexpensive (< \$10) |                                     | 0                  | 0               |
| Safety<br>Safe for environment                       |                                     | 0                  | 5               |
| Technical setup                                      | Common setup                        | 0                  | 0               |
|                                                      | Unconventional activation technique | -                  | -               |
| Temperature/ time                                    | R.T., < 1 h,                        | 0                  | 1               |
|                                                      | Heating, < 1 h                      | -                  | -               |
| Workup and purification<br>Simple filtration         |                                     | 0                  | 0               |
| Eco scale score                                      |                                     | 100-3 = 97         | 100-25.5 = 74.5 |

## V. Computational Details

### Figure S4: Optimized geometries, FMO and the energies of molecule:

The geometry optimization was done without symmetry constraints using Density Functional Theory (DFT). It has been employed to clarify the structure-functional relationship of compounds using the Gaussian 09 program.<sup>S3</sup> The structures were optimized under a combination of the basis of the 6-31G basis set for H, C elements, and 6-31+G\*\* with the B3LYP functional.<sup>S4</sup>

#### Benzaldehyde (1a)

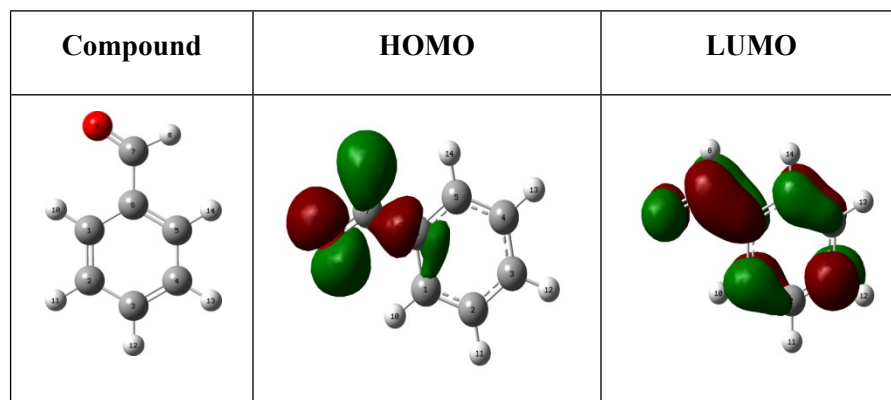

HOMO = -0.37 a.u.; LUMO = -0.23 a.u.;

$\Delta E = \text{HOMO-LUMO} = 0.14 \text{ a.u.}$

SCF energy: -345.58 a. u.

Cartesian Coordinates:

C 31.615 -17.4372 0.  
 C 32.7832 -18.0995 0.  
 C 33.9426 -17.4237 0.  
 C 33.9364 -16.0817 0.  
 C 32.7726 -15.4119 0.  
 C 31.6123 -16.0923 0.  
 C 30.4326 -15.4188 0.  
 H 30.4917 -14.3057 0.  
 O 29.3306 -15.9168 0.  
 H 30.6788 -18.0224 0.

H 32.7915 -19.2035 0.

H 34.901 -17.9715 0.

H 34.8916 -15.5283 0.

H 32.7998 -14.3079 0.

### Hydrogen bonding of BINPT (3a) and Benzaldehyde (1a)

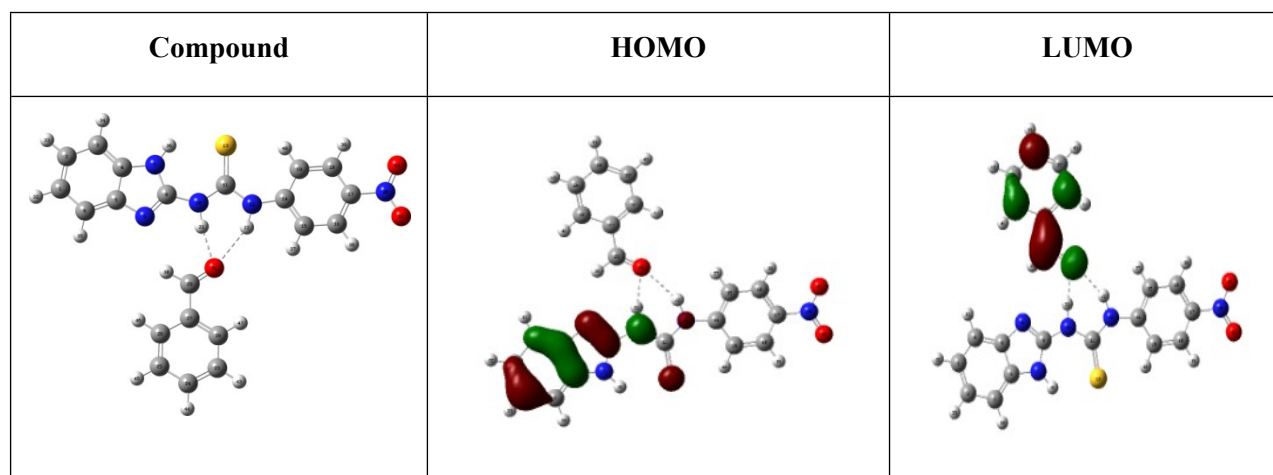

HOMO = -0.21 a.u.; LUMO = -0.09 a.u.;

$\Delta E = \text{HOMO-LUMO} = 0.12 \text{ a.u.}$

SCF energy: -1707.62 a. u.

Cartesian Coordinates:

C 19.33249 -25.67813 2.50186

C 18.95939 -24.56543 1.84096

C 19.85679 -23.83453 1.15646

C 21.12039 -24.26793 1.16886

C 21.50569 -25.36813 1.81916

C 20.61159 -26.09523 2.50016

N 22.21529 -23.76653 0.59496

C 23.22759 -24.57473 0.92296

N 22.82629 -25.61053 1.69136



N 24.48009 -24.35993 0.49096  
C 25.4808 -25.0964 0.9431  
N 26.50846 -25.31916 0.09545  
S 25.7327 -25.2313 2.6139  
C 27.36736 -26.33446 0.31525  
C 28.64946 -26.06516 0.61345  
C 29.51136 -27.07006 0.83615  
C 29.08706 -28.34116 0.75855  
C 27.80736 -28.61356 0.45905  
C 26.94606 -27.60806 0.23635  
N 29.94976 -29.34826 0.98215  
H 24.26878 -23.62316 -0.47148  
H 26.72936 -24.90229 -0.87605  
C 27.36971 -19.35066 -3.04128  
C 27.19331 -19.21246 -4.36438  
C 26.66381 -20.21776 -5.07828  
C 26.30911 -21.36256 -4.47268  
C 26.48691 -21.49856 -3.14608  
C 27.01781 -20.49236 -2.42838  
C 26.12901 -22.65546 -2.52688  
H 25.69401 -23.43856 -3.19978  
O 26.25151 -22.86276 -1.33748  
H 18.57559 -26.25983 3.05596  
H 17.90259 -24.24723 1.86016  
H 19.56949 -22.92063 0.60956  
H 20.91769 -27.00663 3.04136  
H 22.28159 -22.93443 0.02956  
H 28.99986 -25.02036 0.67975

H 30.56356 -26.84476 1.08255  
 H 27.45766 -29.65866 0.39405  
 H 25.89466 -27.83626 -0.01165  
 O 30.89996 -29.05746 1.20245  
 O 29.54976 -30.28096 0.90375  
 H 27.80541 -18.52196 -2.45628  
 H 27.48361 -18.27236 -4.86518  
 H 26.51951 -20.10156 -6.16668  
 H 25.87591 -22.17026 -5.08858  
 H 27.17641 -20.57226 -1.33868

**Intermediate (E)**

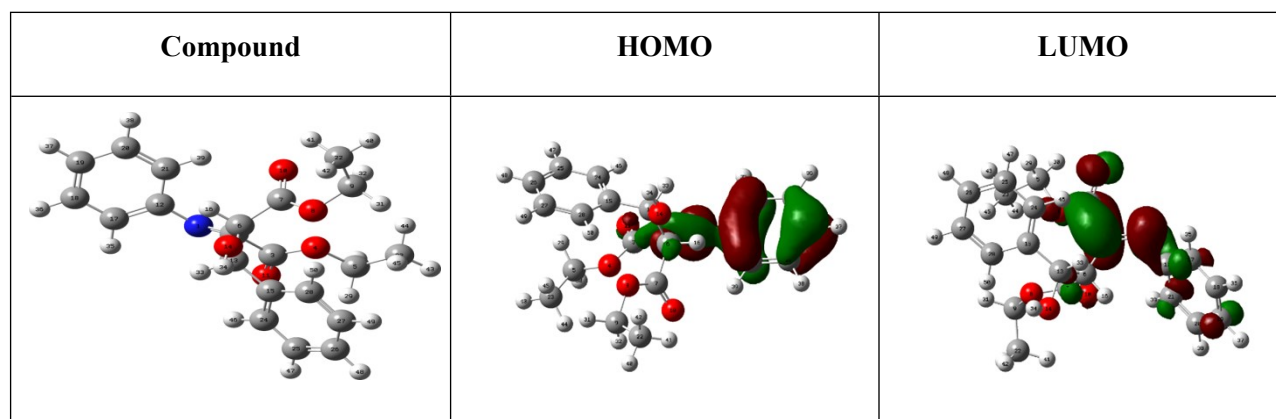

HOMO = -0.22 a.u.; LUMO = -0.06 a.u.;

$\Delta E = \text{HOMO-LUMO} = 0.16 \text{ a.u.}$

SCF energy: -1244.89 A.U.

Cartesian Coordinates:

N 44.9725 -22.5839 -1.2167  
 C 44.6949 -23.7512 -0.5901  
 C 43.3745 -24.0747 -0.4461  
 O 42.9917 -25.3233 -0.1034  
 C 41.6178 -25.6308 -0.177  
 C 45.7926 -24.7124 -0.1258  
 C 45.6882 -26.0757 -0.7925

O 46.4837 -26.9663 -0.1812  
C 46.5161 -28.2788 -0.6889  
O 45.0097 -26.3009 -1.7671  
O 42.5304 -23.2485 -0.7201  
C 46.2443 -22.2483 -1.4971  
C 45.9287 -24.6927 1.4162  
O 47.1841 -25.2121 1.7738  
C 44.84 -25.4122 2.1876  
H 46.7773 -24.3636 -0.515  
C 47.0803 -21.7928 -0.5502  
C 48.3551 -21.5223 -0.8719  
C 48.7835 -21.6868 -2.1337  
C 47.9398 -22.1223 -3.0819  
C 46.6697 -22.4129 -2.7603  
C 47.4991 -28.3459 -1.8617  
C 41.428 -27.1259 0.0976  
C 43.7703 -24.7432 2.6565  
C 42.7986 -25.3743 3.3355  
C 42.8854 -26.6919 3.5697  
C 43.9558 -27.3691 3.1318  
C 44.921 -26.7281 2.4538  
H 41.0896 -25.0298 0.6013  
H 41.2358 -25.39 -1.1991  
H 46.8543 -28.9249 0.1544  
H 45.4886 -28.6106 -0.9722  
H 45.987 -23.6335 1.7601  
H 47.289 -25.0808 2.7012  
H 46.7319 -21.6633 0.4887  
H 49.0538 -21.1741 -0.0919  
H 49.8337 -21.4704 -2.3964  
H 48.2942 -22.2542 -4.119  
H 45.9833 -22.7906 -3.5391  
H 47.5602 -29.3817 -2.2675  
H 47.191 -27.6714 -2.6934

H 48.523 -28.0429 -1.5409  
 H 40.3435 -27.3777 0.1576  
 H 41.88 -27.7433 -0.7123  
 H 41.8992 -27.429 1.0598  
 H 43.6773 -23.6579 2.4767  
 H 41.9222 -24.8117 3.7024  
 H 42.0871 -27.2161 4.1231  
 H 44.041 -28.4525 3.3301  
 H 45.7919 -27.3129 2.1194

### Intermediate (G)

| Compound | HOMO | LUMO |
|----------|------|------|
|          |      |      |

HOMO = -0.20 a.u.; LUMO = -0.04 a.u.;

$\Delta E = \text{HOMO-LUMO} = 0.20 \text{ a.u.}$

SCF energy: -1244.91 a. u.

Cartesian Coordinates:

C 48.1306 -34.6922 0.673  
 C 48.1615 -33.1926 0.5779  
 O 49.5077 -32.7907 0.6968  
 C 50.3231 -33.9455 0.6969  
 C 49.3957 -35.1284 0.7209  
 C 49.7861 -36.4277 0.7707  
 N 47.0261 -35.4667 0.6787  
 C 46.0938 -35.2409 -0.2702  
 O 51.1063 -36.6968 0.8284

C 51.5275 -38.0183 1.0688  
O 48.9828 -37.3329 0.789  
C 51.2482 -33.9368 1.8932  
O 47.4998 -32.5673 1.6335  
H 47.8949 -31.7251 1.7793  
O 47.7448 -32.7408 -0.6849  
C 47.5265 -31.3514 -0.7828  
C 53.0276 -37.9756 1.3784  
C 50.7572 -33.7551 3.1322  
C 51.5644 -33.7597 4.2041  
C 52.8828 -33.9529 4.0497  
C 53.3854 -34.1394 2.8202  
C 52.5719 -34.1289 1.7526  
C 47.2092 -31.0383 -2.2482  
C 45.9589 -36.1386 -1.2611  
C 45.0499 -35.9449 -2.2296  
C 44.2687 -34.8543 -2.2089  
C 44.3939 -33.9609 -1.2161  
C 45.3021 -34.1553 -0.247  
H 50.8779 -33.9282 -0.2707  
H 47.3266 -36.4401 0.6351  
H 50.9706 -38.4346 1.9426  
H 51.331 -38.6196 0.1492  
H 46.6569 -31.0776 -0.1398  
H 48.4452 -30.8088 -0.4577  
H 53.4243 -38.9999 1.5667  
H 53.601 -37.5371 0.529  
H 53.2317 -37.3578 2.2836  
H 49.6742 -33.6038 3.2784  
H 51.144 -33.609 5.214  
H 53.5492 -33.961 4.93  
H 54.4692 -34.3048 2.6884  
H 53.0041 -34.2905 0.7504  
H 47.0226 -29.9492 -2.3931

H 48.0569 -31.3302 -2.9108  
 H 46.3021 -31.5904 -2.5892  
 H 46.6001 -37.0372 -1.2921  
 H 44.9469 -36.6814 -3.0457  
 H 43.5209 -34.6943 -3.006  
 H 43.7459 -33.0669 -1.1932  
 H 45.3755 -33.4181 0.5693

### Product 4a

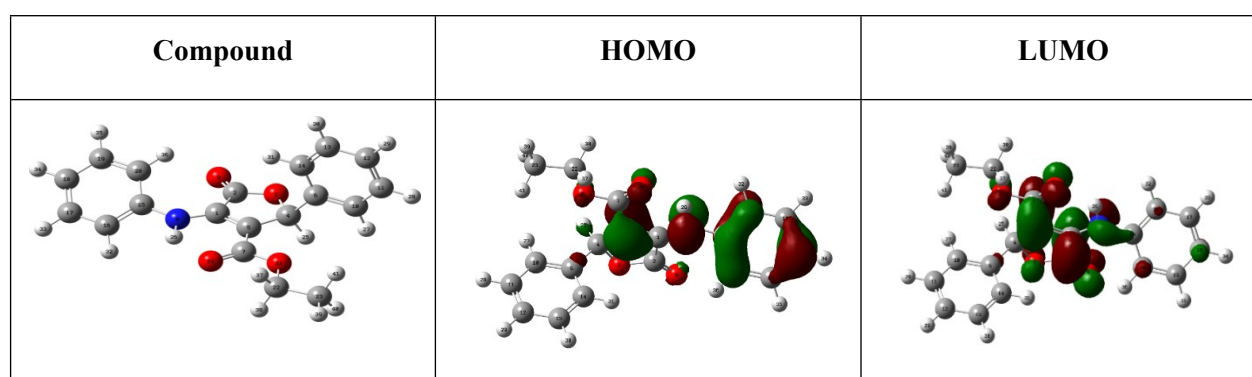

HOMO = -0.21 a.u.; LUMO = -0.07 a.u.;

$\Delta E = \text{HOMO} - \text{LUMO} = 0.14 \text{ a.u.}$

SCF energy: -1089.87 a. u.

Cartesian Coordinates:

C 51.0983 -26.5157 0.3022  
 C 52.4286 -26.7171 0.5079  
 O 53.1665 -25.5946 0.6476  
 C 52.2673 -24.5106 0.5414  
 C 50.9367 -25.1848 0.3476  
 C 52.6197 -23.6111 -0.6213  
 C 49.7442 -24.5419 0.25  
 N 50.1019 -27.4123 0.1994  
 O 52.982 -27.788 0.6074  
 C 52.671 -22.2755 -0.4675  
 C 52.9674 -21.4714 -1.5002

C 53.2177 -21.9965 -2.7089  
C 53.1675 -23.3264 -2.8771  
C 52.8687 -24.1239 -1.8399  
C 50.2213 -28.7525 0.1957  
C 49.3671 -29.4564 0.9577  
C 49.4261 -30.7972 0.9802  
C 50.3247 -31.4421 0.2204  
C 51.1515 -30.7439 -0.5731  
C 51.0923 -29.4028 -0.5949  
O 49.7347 -23.1944 0.2786  
C 48.5679 -22.5167 -0.1231  
C 48.9268 -21.0369 -0.2915  
O 48.7112 -25.153 0.0894  
H 52.298 -23.9803 1.5225  
H 49.2081 -27.0575 0.5346  
H 52.4607 -21.8243 0.5171  
H 53.0014 -20.3774 -1.3566  
H 53.4597 -21.3378 -3.561  
H 53.3679 -23.7639 -3.8706  
H 52.8243 -25.2144 -2.  
H 48.6173 -28.9376 1.5806  
H 48.7316 -31.3702 1.619  
H 50.3697 -32.545 0.2329  
H 51.8704 -31.275 -1.2211  
H 51.7531 -28.8525 -1.2863  
H 48.2113 -22.934 -1.0954  
H 47.796 -22.6484 0.6722  
H 48.0355 -20.4437 -0.6013  
H 49.3099 -20.6063 0.6626  
H 49.7149 -20.9022 -1.0684

## VI. UV-Visible Spectra of Catalyst

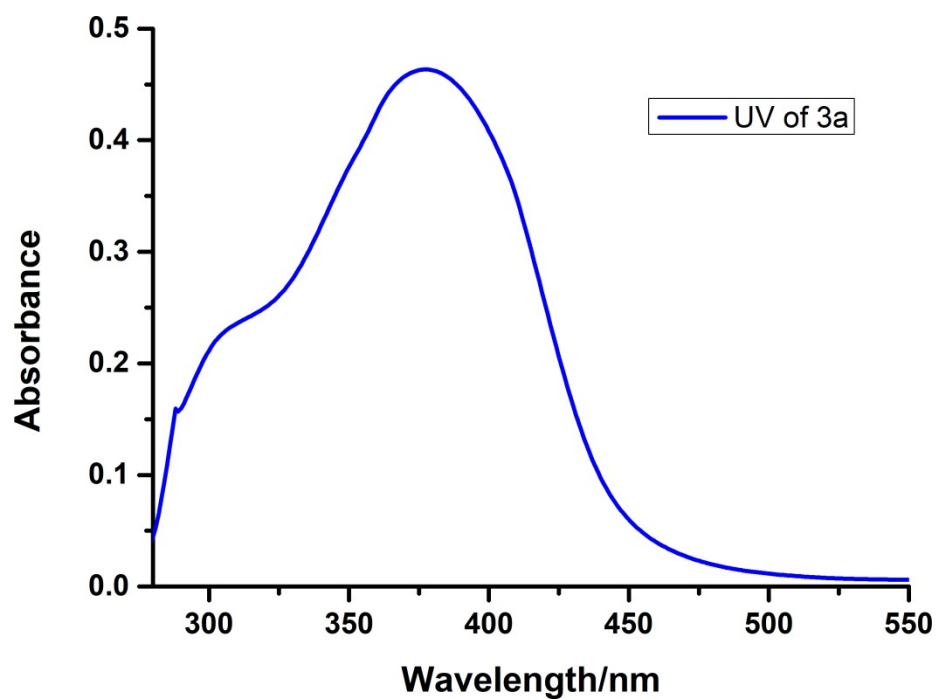

Figure S5. UV-visible spectra of the catalyst 3a

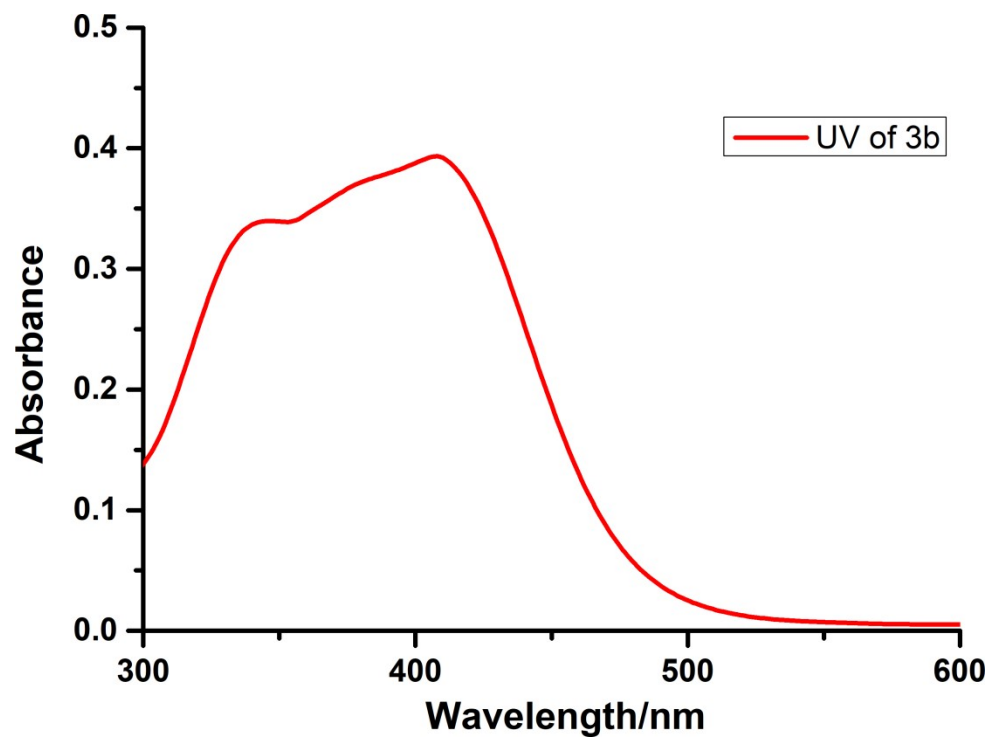

Figure S6. UV-visible spectra of the catalyst 3b



## VII. Photoluminescence (PL) spectra of catalyst

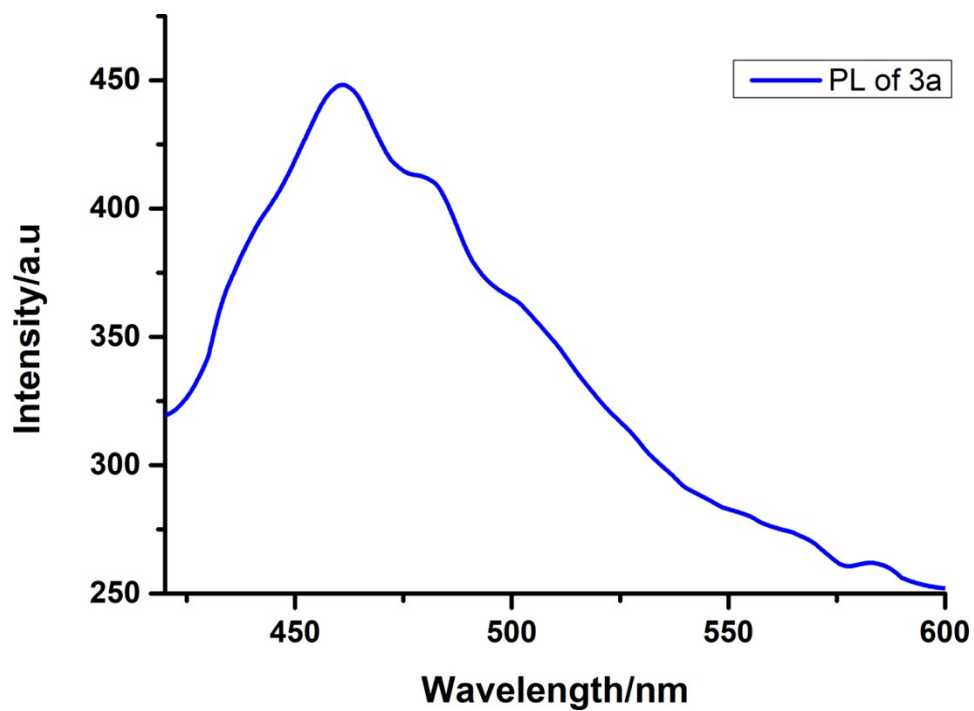

Figure S7. Photoluminescence (PL) spectra of catalyst 3a

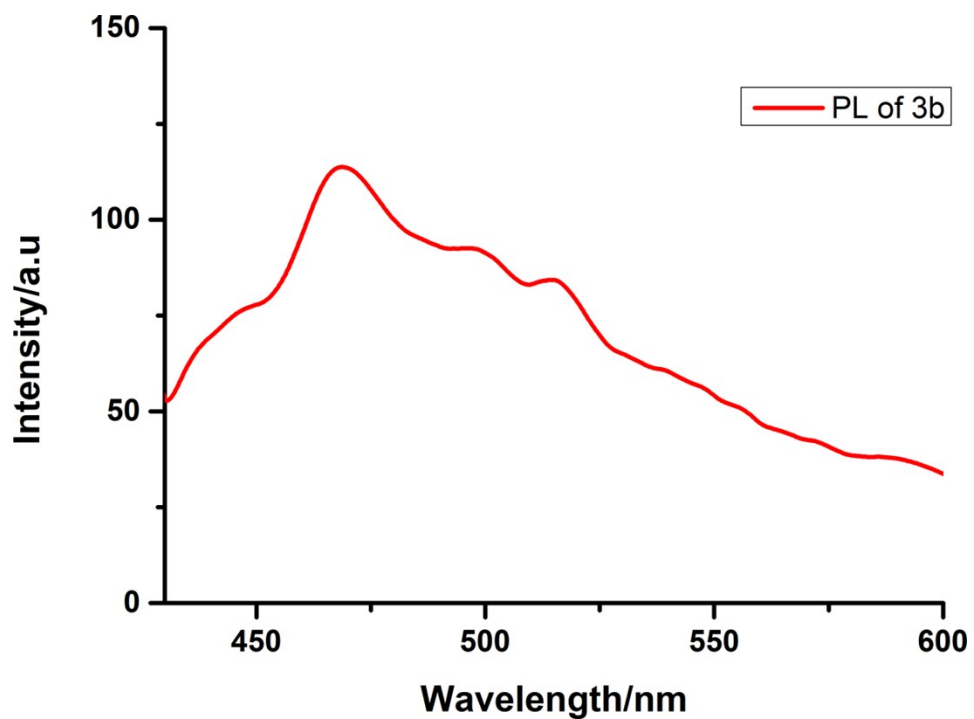

Figure S8. Photoluminescence (PL) spectra of catalyst 3a

**Figure S9.** Calculated molecular orbital amplitude plot of HOMO and LUMO levels and optimized molecular structure of compounds

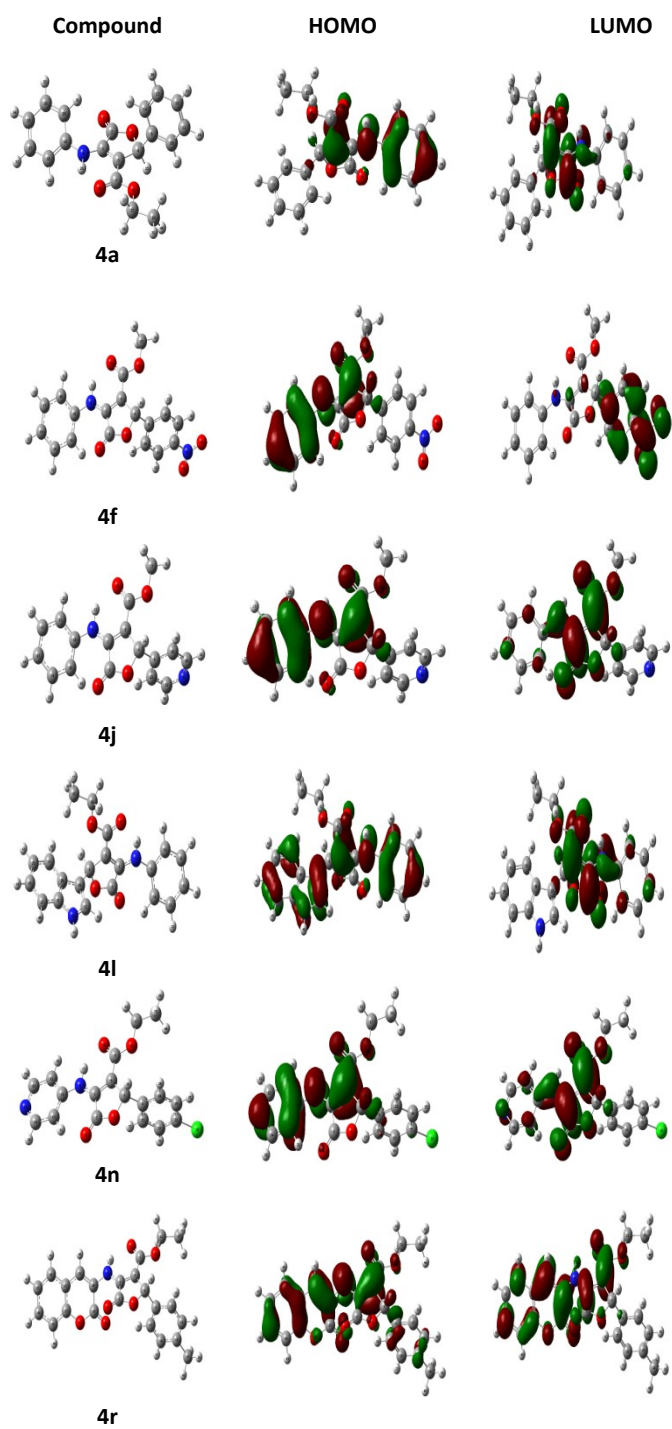

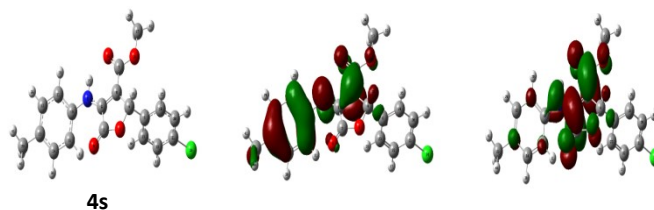

**Table S2:** Electrochemical data of compounds (Theoretical)

| Compound | HOMO (a.u)<br>(DFT) | LUMO (a.u)<br>(DFT) | $\Delta E = \text{HOMO-LUMO}$<br>(a.u) |
|----------|---------------------|---------------------|----------------------------------------|
| 4a       | -0.21               | -0.07               | 0.14                                   |
| 4f       | -0.22               | -0.09               | 0.13                                   |
| 4j       | -0.22               | -0.08               | 0.17                                   |
| 4l       | -0.20               | -0.07               | 0.13                                   |
| 4n       | -0.23               | -0.09               | 0.14                                   |
| 4r       | -0.22               | -0.08               | 0.14                                   |
| 4s       | -0.21               | -0.07               | 0.14                                   |

### VIII. Analytical and spectroscopic data of the synthesized compounds

#### *Ethyl 5-oxo-2-phenyl-4-(phenylamino)-2,5-dihydrofuran-3-carboxylate, 4a*

White solid (yield: 91%); mp: 179-180 °C. IR (KBr):  $\nu$  3215, 2941, 1709, 1496, 1091,  $\text{cm}^{-1}$ .  $^1\text{H}$  NMR ( $\text{CDCl}_3$ , 400 MHz):  $\delta$  9.25 (s, 1H), 7.63 (d, 2H,  $J = 8.4$  Hz), 7.44-7.35 (m, 6H), 7.25 (t, 1H,  $J = 7.6$  Hz), 5.89 (s, 1H), 4.36 (q, 2H,  $J = 7.0$  Hz), 1.34 (t, 3H,  $J = 7.0$  Hz) ppm;  $^{13}\text{C}$  NMR ( $\text{CDCl}_3$ , 100 MHz):  $\delta$  165.7, 163.5, 157.1, 136.8, 136.6, 129.6, 129.2, 128.1, 126.4, 122.9, 113.8, 62.1, 61.9, 31.5, 14.5 ppm. HRMS (ESI)  $m/z$ :  $[\text{M} + 1]^+$  calcd, 324.1236; found, 324.1237.

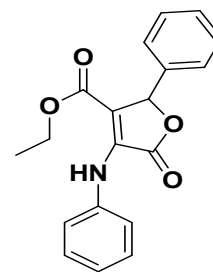

#### *Ethyl 2-(4-bromophenyl)-5-oxo-4-(phenylamino)-2,5-dihydrofuran-3-carboxylate, 4b*

White solid (yield: 94%); mp: 189-190 °C. IR (KBr):  $\nu$  3311, 2980, 1721, 1490, 1087  $\text{cm}^{-1}$ .  $^1\text{H}$  NMR ( $\text{CDCl}_3$ , 400 MHz):  $\delta$  9.23 (s, 1H), 7.62 (d, 2H,  $J = 7.6$  Hz), 7.56 (d, 2H,  $J = 7.4$  Hz), 7.48 (d, 2H,  $J = 7.6$  Hz), 7.32-7.27 (m, 3H), 5.89 (s, 1H), 4.39 (q, 2H,  $J = 7.2$  Hz), 1.39 (t, 3H,  $J = 7.0$  Hz) ppm;  $^{13}\text{C}$  NMR ( $\text{CDCl}_3$ , 100 MHz):  $\delta$  165.3, 163.1, 156.9, 136.3, 134.7, 132.2, 129.6, 129.5, 126.5, 122.9, 122.6, 113.1, 61.8, 61.3, 31.4, 14.4 ppm. ESI-MS: 401  $[\text{M}]^+$ , 403  $[\text{M}+2]^+$

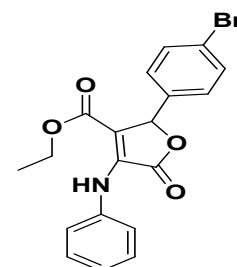

***Ethyl 2-(3-chlorophenyl)-5-oxo-4-(phenylamino)-2,5-dihydrofuran-3-carboxylate, 4c***

White solid (yield: 87%); mp:185-187 °C. IR (KBr):  $\nu$  3329, 2951, 1720, 1489, 1090,  $\text{cm}^{-1}$ .  $^1\text{H}$  NMR ( $\text{CDCl}_3$ , 400 MHz):  $\delta$  8.90 (s, 1H), 7.28 (d, 2H,  $J = 7.6$  Hz), 7.13-7.07 (m, 3H), 7.03-6.99 (m, 2H), 6.95 (d, 1H,  $J = 7.4$  Hz), 6.92-6.89 (m, 1H), 5.52 (s, 1H), 4.02 (q, 2H,  $J = 7.0$  Hz), 1.03 (t, 3H,  $J = 7.0$  Hz) ppm;  $^{13}\text{C}$  NMR ( $\text{CDCl}_3$ , 100 MHz):  $\delta$  165.2, 162.9, 156.9, 137.6, 136.2, 134.6, 130.2, 129.4, 129.0, 128.1, 126.3, 125.7, 122.4, 112.9, 61.7, 61.1, 14.2 ppm. ESI-MS:  $m/z$  358  $[\text{M}+1]^+$

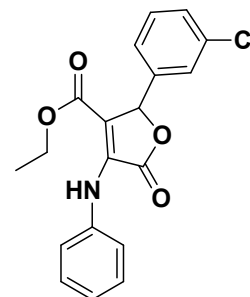***Ethyl 5-oxo-4-(phenylamino)-2-(p-tolyl)-2,5-dihydrofuran-3-carboxylate, 4d***

White solid (yield: 85%); mp:180-181 °C. IR (KBr):  $\nu$  3341, 2982, 1712, 1482, 1094,  $\text{cm}^{-1}$ .  $^1\text{H}$  NMR ( $\text{CDCl}_3$ , 400 MHz):  $\delta$  9.21 (s, 1H), 7.66 (d, 2H,  $J = 7.6$  Hz), 7.44 (t, 3H,  $J = 7.4$  Hz), 7.28 (d, 3H,  $J = 7.6$  Hz), 7.22 (d, 2H,  $J = 7.6$  Hz), 5.88 (s, 1H), 4.37 (q, 2H,  $J = 7.0$  Hz), 2.43 (s, 3H), 1.38 (t, 3H,  $J = 7.0$  Hz) ppm;  $^{13}\text{C}$  NMR ( $\text{CDCl}_3$ , 100 MHz):  $\delta$  165.4, 163.1, 156.6, 138.5, 136.6, 132.1, 129.5, 129.2, 127.6, 126.0, 122.5, 113.5, 61.6, 61.5, 21.4, 14.2 ppm. ESI-MS:  $m/z$  337  $[\text{M}]^+$

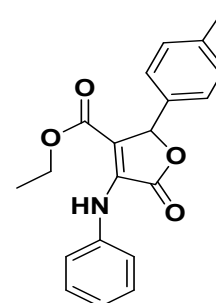***Methyl 5-oxo-2-phenyl-4-(phenylamino)-2,5-dihydrofuran-3-carboxylate, 4e***

White solid (yield: 90%); mp: 185-187 °C. IR (KBr):  $\nu$  3462, 29459, 1712, 1486, 1091  $\text{cm}^{-1}$ .  $^1\text{H}$  NMR ( $\text{CDCl}_3$ , 400 MHz):  $\delta$  8.90 (s, 1H), 7.50 (d, 2H,  $J = 7.6$  Hz), 7.33-7.25 (m, 7H), 7.14 (m, 1H), 5.78 (s, 1H), 3.78 (s, 3H) ppm;  $^{13}\text{C}$  NMR ( $\text{CDCl}_3$ , 100 MHz):  $\delta$  164.8, 162.5, 155.7, 135.7, 134.5, 128.6, 128.3, 128.2, 127.1, 125.6, 122.0, 112.5, 61.2, 51.7 ppm. ESI-MS:  $m/z$  310  $[\text{M}+1]^+$

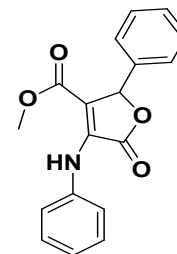***Methyl 2-(4-nitrophenyl)-5-oxo-4-(phenylamino)-2,5-dihydrofuran-3-carboxylate, 4f***

White solid (yield: 89%); mp:136-138 °C. IR (KBr):  $\nu$  3351, 2971, 1721, 1494, 1049,  $\text{cm}^{-1}$ .  $^1\text{H}$  NMR ( $\text{CDCl}_3$ , 400 MHz):  $\delta$  8.90 (s, 1H), 7.97 (d, 2H,  $J = 7.6$  Hz), 7.28 (d, 4H,  $J = 7.4$  Hz), 7.14 (t, 2H,  $J = 7.6$  Hz), 6.99 (s, 1H), 5.72 (s, 1H), 3.61 (s, 3H) ppm;  $^{13}\text{C}$  NMR ( $\text{CDCl}_3$ , 100 MHz):  $\delta$  164.6, 163.1, 156.91, 148.2, 142.9, 135.7, 129.5, 128.8, 126.7, 124.2, 122.4, 112.4, 61.0, 52.5 ppm. HRMS (ESI)  $m/z$ :  $[\text{M} + 1]^+$  calcd, 355.0922; found, 355.0926.

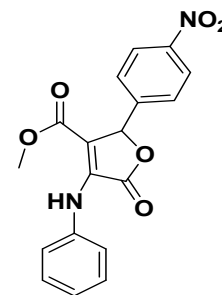

**Methyl 2-(3-chlorophenyl)-5-oxo-4-(phenylamino)-2,5-dihydrofuran-3-carboxylate, 4g**

White solid (yield: 89%); mp: 170-172 °C. IR (KBr):  $\nu$  3442, 2951, 1727, 1494, 1079  $\text{cm}^{-1}$ .  $^1\text{H}$  NMR ( $\text{CDCl}_3$ , 400 MHz):  $\delta$  9.06 (s, 1H), 7.50 (d, 2H,  $J = 8.0$  Hz), 7.36 (t, 2H,  $J = 7.8$  Hz), 7.32 (s, 1H), 7.25 (s, 1H), 7.22-7.16 (m, 3H), 5.77 (s, 1H), 3.83 (s, 3H) ppm;  $^{13}\text{C}$  NMR ( $\text{CDCl}_3$ , 100 MHz):  $\delta$  165.1, 163.1, 156.3, 137.4, 136.0, 134.8, 130.2, 129.4, 129.4, 129.1, 127.8, 126.5, 125.9, 122.6, 112.7, 61.3, 52.4 ppm. ESI-MS: 343  $[\text{M}]^+$ , 345  $[\text{M}+2]^+$

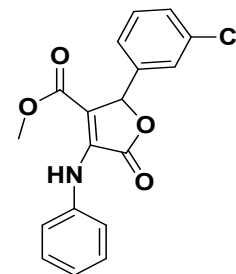**Methyl 2-(3-methoxyphenyl)-5-oxo-4-(phenylamino)-2,5-dihydrofuran-3-carboxylate, 4h**

White solid (yield: 82%); mp: 169-170 °C. IR (KBr):  $\nu$  3450, 2953, 1710, 1491, 1033  $\text{cm}^{-1}$ .  $^1\text{H}$  NMR ( $\text{CDCl}_3$ , 400 MHz):  $\delta$  8.95 (s, 1H), 7.46 (d, 2H,  $J = 7.4$  Hz), 7.28 (t, 2H,  $J = 7.6$  Hz), 7.17 (t, 1H,  $J = 7.6$  Hz), 7.11 (t, 1H,  $J = 7.6$  Hz), 6.83 (d, 1H,  $J = 7.6$  Hz), 6.75 (t, 2H,  $J = 8.0$  Hz), 5.71 (s, 1H), 3.76 (s, 3H), 3.73 (s, 3H) ppm;  $^{13}\text{C}$  NMR ( $\text{CDCl}_3$ , 100 MHz):  $\delta$  164.9, 162.4, 159.3, 155.9, 136.2, 135.8, 129.3, 128.6, 125.6, 122.0, 119.6, 113.4, 112.7, 112.4, 61.1, 54.8, 51.7 ppm. ESI-MS:  $m/z$  340  $[\text{M}+1]^+$

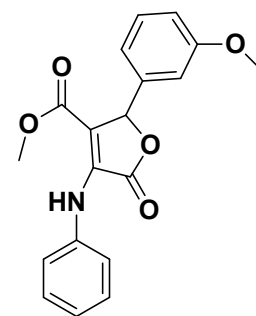**Methyl 2-(4-methoxyphenyl)-5-oxo-4-(phenylamino)-2,5-dihydrofuran-3-carboxylate, 4i**

White solid (yield : 84%); mp: 240-242 °C. IR (KBr):  $\nu$  3438, 3229, 2957, 1681, 1464, 1038  $\text{cm}^{-1}$ .  $^1\text{H}$  NMR ( $\text{CDCl}_3$ , 400 MHz):  $\delta$  8.87 (s, 1H), 7.37 (d, 2H,  $J = 8.0$  Hz), 7.19 (t, 2H,  $J = 7.8$  Hz), 7.06-7.04 (m, 3H), 6.69 (d, 2H,  $J = 7.6$  Hz), 5.62 (s, 1H), 3.67 (s, 3H), 3.66 (s, 3H) ppm;  $^{13}\text{C}$  NMR ( $\text{CDCl}_3$ , 100 MHz):  $\delta$  165.5, 163.1, 159.8, 156.1, 136.4, 129.2, 128.9, 127.5, 126.9, 126.2, 126.1, 122.8, 114.3, 113.2, 61.4, 55.4, 52.3 ppm. HRMS (ESI)  $m/z$ :  $[\text{M} + 1]^+$  calcd, 340.1185; found, 340.1183.

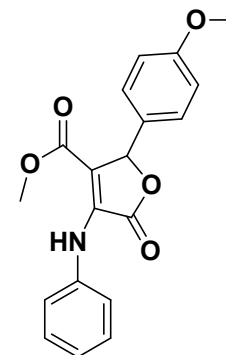**Methyl 5-oxo-4-(phenylamino)-2-(pyridin-4-yl)-2,5-dihydrofuran-3-carboxylate, 4j**

White solid (yield: 77 %); mp: 136-137 °C. IR (KBr):  $\nu$  3441, 3226, 2922, 1670, 1464, 1093  $\text{cm}^{-1}$ .  $^1\text{H}$  NMR ( $\text{DMSO-d}_6$ , 400 MHz):  $\delta$  12.29 (s, 1H), 8.27 (d, 2H,  $J = 8.4$  Hz), 7.79 (t, 4H,  $J = 7.6$  Hz), 7.49 (t, 2H,  $J = 8.0$  Hz), 7.29 (t, 1H,  $J = 7.2$  Hz), 6.49 (s, 1H), 3.78 (s, 3H) ppm;  $^{13}\text{C}$  NMR ( $\text{DMSO-d}_6$ , 100 MHz):  $\delta$  164.3, 162.8, 153.7, 147.6,

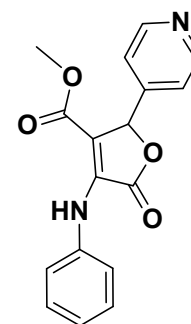

145.0, 136.3, 129.7, 129.3, 126.1, 123.9, 122.9, 111.5, 60.1, 56.5, 51.7, 31.1, 19.0 ppm. ESI-MS:  $m/z$  311  $[M+1]^+$

***Ethyl 5-oxo-4-(phenylamino)-2,5-dihydro-[2,2'-bifuran]-3-carboxylate, 4k***

White solid (yield: 75 %); mp: 185-187 °C. IR (KBr):  $\nu$  3446, 3223, 2920, 1673, 1461, 1099  $\text{cm}^{-1}$ .  $^1\text{H}$  NMR (DMSO- $d_6$ , 400 MHz):  $\delta$  12.06 (s, 1H), 7.78 (d, 2H,  $J = 7.6$  Hz), 7.60 (s, 1H), 7.50 (t, 2H,  $J = 8.0$  Hz), 7.46-7.38 (m, 3H), 7.30 (t, 1H,  $J = 7.2$  Hz), 6.31 (s, 1H), 4.30-4.15 (m, 2H), 1.29 (t, 3H,  $J = 6.8$  Hz) ppm;  $^{13}\text{C}$  NMR (DMSO- $d_6$ , 100 MHz):  $\delta$  164.4, 162.4, 153.5, 139.6, 136.5, 13.1, 130.6, 129.3, 128.7, 128.5, 126.6, 126.0, 122.9, 112.0, 60.3, 60.2, 14.5 ppm. ESI-MS:  $m/z$  314  $[M+1]^+$

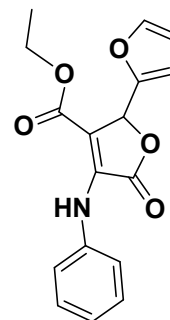

***Ethyl 2-(1H-indol-3-yl)-5-oxo-4-(phenylamino)-2,5-dihydrofuran-3-carboxylate, 4l***

White solid (yield: 79 %); mp: 188-189 °C. IR (KBr):  $\nu$  3436, 3227, 2923, 1671, 1465, 1093  $\text{cm}^{-1}$ .  $^1\text{H}$  NMR (DMSO- $d_6$ , 400 MHz):  $\delta$  12.02 (s, 1H), 7.75 (d, 2H,  $J = 7.6$  Hz), 7.60 (d, 2H,  $J = 8.4$  Hz), 7.49 (t, 2H,  $J = 7.6$  Hz), 7.43 (d, 2H,  $J = 8.4$  Hz), 7.43 (d, 2H,  $J = 8.4$  Hz), 7.29 (t, 1H,  $J = 7.6$  Hz), 6.29 (s, 1H), 4.26-4.19 (m, 2H), 1.29 (t, 3H,  $J = 7.2$  Hz) ppm;  $^{13}\text{C}$  NMR (DMSO- $d_6$ , 100 MHz):  $\delta$  164.4, 162.4, 153.3, 136.7, 136.5, 131.6, 130.5, 129.2, 125.9, 123.0, 121.5, 112.1, 60.3, 60.2, 14.5 ppm. ESI-MS:  $m/z$  363  $[M+1]^+$

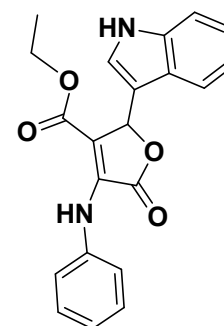

***Ethyl 5-oxo-2-(thiophen-2-yl)-4-(p-tolylamino)-2,5-dihydrofuran-3-carboxylate, 4m***

White solid (yield: 74 %); mp: 180-182 °C. IR (KBr):  $\nu$  3443, 3223, 2921, 1675, 1463, 1096  $\text{cm}^{-1}$ .  $^1\text{H}$  NMR (DMSO- $d_6$ , 400 MHz):  $\delta$  11.84 (s, 1H), 7.76 (d, 2H,  $J = 7.6$  Hz), 7.47 (t, 2H,  $J = 7.6$  Hz), 7.32 (d, 2H,  $J = 7.6$  Hz), 7.27 (t, 1H,  $J = 7.2$  Hz), 7.21 (d, 2H,  $J = 8.0$  Hz), 6.21 (s, 1H), 4.29-4.17 (m, 2H), 2.37 (s, 3H), 1.29 (t, 3H,  $J = 6.8$  Hz) ppm;  $^{13}\text{C}$  NMR (DMSO- $d_6$ , 100 MHz):  $\delta$  164.0, 162.0, 152.5, 137.1, 136.3, 133.4, 128.9, 128.7, 127.6, 125.3, 122.5, 112.3, 60.4, 59.7, 20.7, 14.1 ppm. HRMS (ESI)  $m/z$ :  $[M + 1]^+$  calcd, 344.0687; found, 344.0692.

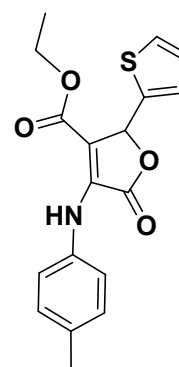

***Ethyl 2-(4-chlorophenyl)-5-oxo-4-(pyridin-4-ylamino)-2,5-dihydrofuran-3-carboxylate, 4n***

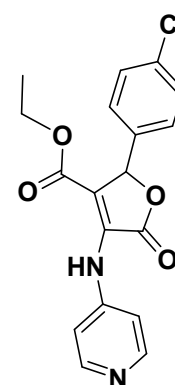

White solid (yield: 77 %); mp: 178-180 °C. IR (KBr):  $\nu$  3448, 3225, 2927, 1678, 1464, 1098  $\text{cm}^{-1}$ .  $^1\text{H}$  NMR (DMSO- $d_6$ , 400 MHz):  $\delta$  8.35 (d, 2H,  $J = 7.6$  Hz), 8.11 (d, 2H,  $J = 7.4$  Hz), 7.52 (d, 2H,  $J = 8.0$  Hz), 7.44 (t, 2H,  $J = 7.6$  Hz), 7.38 (t, 1H,  $J = 8.0$  Hz), 6.39 (s, 1H), 4.28-4.18 (m, 2H), 1.28 (t, 3H,  $J = 6.8$  Hz) ppm;  $^{13}\text{C}$  NMR (DMSO- $d_6$ , 100 MHz):  $\delta$  164.9, 162.0, 152.0, 143.7, 142.2, 136.1, 128.6, 128.4, 127.9, 124.6, 121.8, 113.3, 60.5, 60.1, 14.1 ppm. HRMS (ESI)  $m/z$ :  $[\text{M} + 1]^+$  calcd, 340.1185; found, 340.1183.

**Ethyl 5-oxo-4-(pyridin-4-ylamino)-2-(p-tolyl)-2,5-dihydrofuran-3-carboxylate, 4o**

White solid (yield: 78 %); mp: 184-186 °C. IR (KBr):  $\nu$  3444, 3221, 2920, 1676, 1465, 1091  $\text{cm}^{-1}$ .  $^1\text{H}$  NMR (DMSO- $d_6$ , 400 MHz):  $\delta$  11.96 (s, 1H), 7.62 (d, 2H,  $J = 7.6$  Hz), 7.42-7.40 (m, 3H), 7.36-7.33 (m, 1H), 7.27 (d, 2H,  $J = 7.4$  Hz), 6.20 (s, 1H), 4.26-4.15 (m, 2H), 2.38 (s, 3H), 1.26 (t, 3H,  $J = 7.2$  Hz) ppm;  $^{13}\text{C}$  NMR (DMSO- $d_6$ , 100 MHz):  $\delta$  163.9, 162.1, 152.8, 136.7, 134.7, 133.8, 129.2, 128.3, 127.9, 127.8, 122.6, 112.1, 60.8, 59.7, 20.5, 14.1 ppm. ESI-MS:  $m/z$  339  $[\text{M}+1]^+$

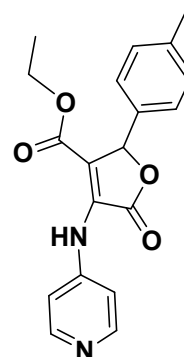

**Methyl 5-oxo-2-phenyl-4-(pyridin-4-ylamino)-2,5-dihydrofuran-3-carboxylate, 4p**

White solid (yield: 81 %); mp: 171-174 °C. IR (KBr):  $\nu$  3445, 3226, 2924, 1677, 1463, 1095  $\text{cm}^{-1}$ .  $^1\text{H}$  NMR (DMSO- $d_6$ , 400 MHz):  $\delta$  12.55 (s, 1H), 7.77 (d, 2H,  $J = 8.0$  Hz), 7.58 (s, 1H), 7.50 (t, 2H,  $J = 7.6$  Hz), 7.42 (s, 2H), 7.30 (t, 1H,  $J = 7.2$  Hz), 6.32 (s, 1H), 3.80 (s, 3H) ppm;  $^{13}\text{C}$  NMR (DMSO- $d_6$ , 100 MHz):  $\delta$  175.0, 171.7, 164.3, 162.9, 153.3, 139.7, 136.4, 133.1, 130.6, 129.2, 128.5, 1228.3, 126.6, 126.0, 122.9, 111.7, 72.9, 60.2, 51.6 ppm. ESI-MS:  $m/z$  311  $[\text{M}+1]^+$

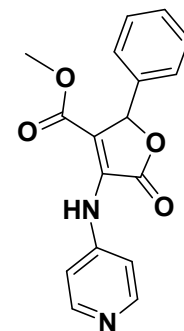

**Methyl 5-oxo-4-((2-oxo-2H-chromen-3-yl)amino)-2-phenyl-2,5-dihydrofuran-3-carboxylate, 4q**

White solid (yield: 78 %); mp: 186-189 °C. IR (KBr):  $\nu$  3437, 3218, 2924, 1675, 1463, 1095  $\text{cm}^{-1}$ .  $^1\text{H}$  NMR ( $\text{CDCl}_3$ , 400 MHz):  $\delta$  11.87 (s, 1H), 7.76 (d, 2H,  $J = 7.6$  Hz), 7.49-7.33 (m, 8H), 7.27 (t, 1H,  $J = 7.6$  Hz), 6.27 (s, 1H), 3.78 (s, 3H) ppm;  $^{13}\text{C}$  NMR (DMSO- $d_6$ , 100 MHz):  $\delta$  164.7, 163.2, 153.3, 137.2, 137.0, 129.4, 129.0, 128.7, 128.4, 126.1, 123.3, 112.7, 61.3, 51.9 ppm. ESI-MS:  $m/z$  378  $[\text{M}+1]^+$

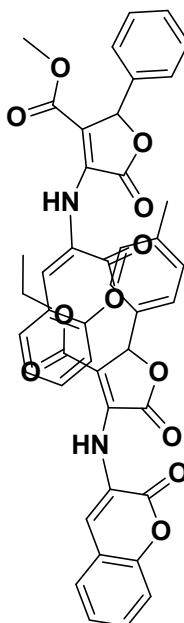

**Ethyl 5-oxo-4-((2-oxo-2H-chromen-3-yl)amino)-2-(p-tolyl)-2,5-dihydrofuran-3-carboxylate, 4r**

White solid (yield: 78 %); mp: 177-180 °C. IR (KBr):  $\nu$  3437, 3218, 2924, 1675, 1463, 1095  $\text{cm}^{-1}$ .  $^1\text{H}$  NMR ( $\text{CDCl}_3$ , 400 MHz):  $\delta$  11.92 (s, 1H), 7.76 (d, 2H,  $J = 7.6$  Hz), 7.49-7.39 (m, 6H), 7.37-7.33 (m, 1H), 7.27 (t, 1H,  $J = 7.6$  Hz), 6.26 (s, 1H), 4.27-4.16 (m, 2H), 1.27 (t, 3H,  $J = 6.8$  Hz) ppm;  $^{13}\text{C}$  NMR ( $\text{DMSO-d}_6$ , 100 MHz):  $\delta$  164.4, 162.4, 153.0, 136.9, 136.7, 129.1, 128.6, 128.3, 128.1, 125.7, 122.9, 112.6, 61.0, 60.1, 14.4 ppm. ESI-MS:  $m/z$  406  $[\text{M}+1]^+$

***Methyl 2-(4-chlorophenyl)-5-oxo-4-(p-tolylamino)-2,5-dihydrofuran-3-carboxylate, 4s***

White solid (yield: 89%); mp: 180-182 °C. IR (KBr):  $\nu$  3442, 3229, 2926, 1672, 1468, 1090  $\text{cm}^{-1}$ .  $^1\text{H}$  NMR ( $\text{CDCl}_3$ , 400 MHz):  $\delta$  8.88 (s, 1H), 7.21 (d, 2H,  $J = 8.4$  Hz), 7.15 (d, 2H,  $J = 8.4$  Hz), 7.07 (d, 2H,  $J = 8.0$  Hz), 7.01 (d, 2H,  $J = 8.0$  Hz), 5.61 (s, 1H), 3.68 (s, 3H), 2.19 (s, 3H) ppm;  $^{13}\text{C}$  NMR ( $\text{CDCl}_3$ , 100 MHz):  $\delta$  164.9, 162.6, 156.1, 136.0, 134.3, 133.6, 133.2, 129.6, 128.9, 128.8, 122.4, 112.3, 61.0, 52.0, 20.8 ppm. ESI-MS:  $m/z$  357  $[\text{M}]^+$ , 359  $[\text{M}+2]^+$

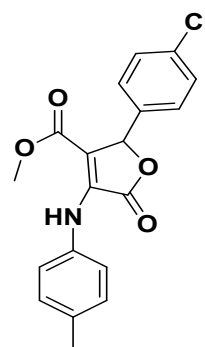

***Ethyl 4-((4-nitrophenyl)amino)-5-oxo-2-phenyl-2,5-dihydrofuran-3-carboxylate, 4t***

White solid (yield: 90%); mp: 177-179 °C. IR (KBr):  $\nu$  3446, 2990, 1734, 1453, 1026  $\text{cm}^{-1}$ .  $^1\text{H}$  NMR ( $\text{CDCl}_3$ , 400 MHz):  $\delta$  9.32 (s, 1H), 8.30 (d, 2H,  $J = 8.4$  Hz), 7.96 (d, 2H,  $J = 8.0$  Hz), 7.46-7.40 (m, 5H), 5.97 (s, 1H), 4.37 (q, 2H,  $J = 7.2$  Hz), 1.37 (t, 3H,  $J = 7.0$  Hz) ppm;  $^{13}\text{C}$  NMR ( $\text{CDCl}_3$ , 100 MHz):  $\delta$  164.5, 162.9, 155.3, 143.7, 141.6, 133.8, 128.7, 128.6, 126.9, 124.3, 120.2, 113.7, 61.3, 60.7, 13.5 ppm. HRMS (ESI)  $m/z$ :  $[\text{M} + 1]^+$  calcd, 369.1084; found, 369.1087.

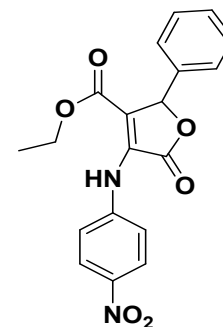

***Ethyl 5-oxo-2-phenyl-4-(p-tolylamino)-2,5-dihydrofuran-3-carboxylate, 4u***

White solid (yield: 85%); mp: 185-187 °C. IR (KBr):  $\nu$  3307, 2984, 1690, 1494, 1098  $\text{cm}^{-1}$ .  $^1\text{H}$  NMR ( $\text{CDCl}_3$ , 400 MHz):  $\delta$  9.12 (s, 1H), 7.38 (d, 2H,  $J = 8.4$  Hz), 7.32-7.25 (m, 4H), 7.11 (d, 2H,  $J = 8.0$  Hz), 5.74 (s, 1H), 4.23 (q, 2H,  $J = 7.2$  Hz), 2.29 (s, 3H), 1.22 (t, 3H,  $J = 7.0$  Hz) ppm;  $^{13}\text{C}$  NMR ( $\text{CDCl}_3$ , 100 MHz):  $\delta$  165.4, 163.0, 156.9, 136.0, 135.4, 133.9, 128.8, 127.8, 127.8, 122.6, 113.2, 61.9, 61.4, 31.2, 21.1, 14.2 ppm. ESI-MS:  $m/z$  337  $[\text{M}]^+$

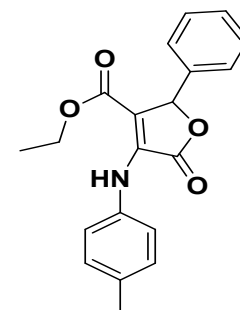



**Methyl 2-(3-chlorophenyl)-4-((4-methoxyphenyl)amino)-5-oxo-2,5-dihydrofuran-3-carboxylate, 4v**

White solid (yield: 85%); mp: 177-179 °C. IR (KBr):  $\nu$  3424, 3187, 2958, 1673, 1470, 1085  $\text{cm}^{-1}$ .  $^1\text{H}$  NMR ( $\text{CDCl}_3$ , 400 MHz):  $\delta$  8.95 (s, 1H), 7.20 (d, 3H,  $J = 9.2$  Hz), 7.13-7.10 (m, 2H), 7.01 (d, 1H,  $J = 8.4$  Hz), 6.74 (d, 2H,  $J = 8.6$  Hz), 5.54 (s, 1H), 3.68 (s, 3H), 3.67 (s, 3H) ppm;  $^{13}\text{C}$  NMR ( $\text{CDCl}_3$ , 100 MHz):  $\delta$  164.9, 162.6, 157.7, 156.3, 137.2, 134.4, 129.9, 128.8, 128.6, 127.5, 125.7, 124.4, 114.3, 112.1, 61.5, 55.3, 52.1 ppm. HRMS (ESI)  $m/z$ :  $[\text{M} + 1]^+$  calcd, 374.0793; found, 374.0795.

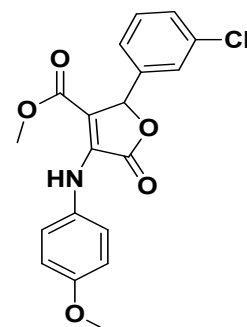**1-(1H-benzo[d]imidazol-2-yl)-3-(4-nitrophenyl) thiourea 3a (BINPT)**

Greenish yellow solid (yield: 65%); mp: 219–221 °C. IR (KBr):  $\nu$  3259, 1621, 1582, 1547, 1452, 1323, 1295, 1246, 1112, 848, 746  $\text{cm}^{-1}$ .  $^1\text{H}$  NMR ( $\text{DMSO-d}_6$ , 400 MHz):  $\delta$  13.02 (s, 2H), 10.46 (s, 1H), 8.22–8.17 (m, 4H), 7.61–7.58 (m, 2H), 7.34–7.31 (m, 2H) ppm;  $^{13}\text{C}$  NMR ( $\text{DMSO-d}_6$ , 100 MHz):  $\delta$  153.2, 147.0, 141.2, 129.2, 124.9, 123.5, 121.4, 120.2, 112.2, 111.8 ppm. ESI-MS:  $m/z$  314  $[\text{M}+1]^+$

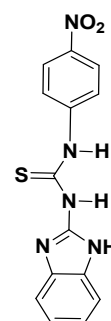**1-(4-methylbenzo[d]thiazol-2-yl)-3-(4-nitrophenyl) thiourea 3b (MBNPT)**

Off-white solid (yield: 54%); mp: 227–230 °C. IR (KBr):  $\nu$  2956, 1574, 1515, 1335, 1264, 1193, 848, 740, 693  $\text{cm}^{-1}$ .  $^1\text{H}$  NMR ( $\text{DMSO-d}_6$ , 400 MHz):  $\delta$  13.20 (s, 1H), 10.95 (s, 1H), 8.20 (d, 2H,  $J = 8.8$  Hz), 8.13 (d, 2H,  $J = 8.8$  Hz), 7.72 (d, 1H,  $J = 7.2$  Hz), 7.29–7.21 (m, 2H), 2.56 (s, 3H) ppm;  $^{13}\text{C}$  NMR ( $\text{DMSO-d}_6$ , 100 MHz):  $\delta$  145.6, 141.6, 127.9, 124.4, 123.8, 120.7, 119.9, 17.7 ppm. ESI-MS:  $m/z$  345  $[\text{M}+1]^+$

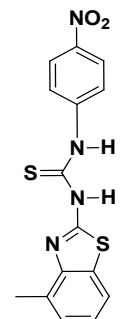**1-(4-nitrophenyl)-3-(p-tolyl)thiourea (NPTT)**

white solid (yield: 48%); mp: 212–213 °C. IR (KBr):  $\nu$  2952, 1573, 1517, 1339, 1260, 1191, 847, 742, 692  $\text{cm}^{-1}$ .  $^1\text{H}$  NMR ( $\text{DMSO-d}_6$ , 400 MHz):  $\delta$  13.20 (s, 1H), 10.95 (s, 1H), 8.20 (d, 2H,  $J = 8.8$  Hz), 8.13 (d, 2H,  $J = 8.8$  Hz), 7.72 (d, 1H,  $J = 7.2$  Hz), 7.29–7.21 (m, 2H), 2.56 (s, 3H) ppm;  $^{13}\text{C}$  NMR ( $\text{DMSO-d}_6$ , 100 MHz):  $\delta$  146.0, 142.0, 128.4, 124.9, 124.3, 121.1, 120.4, 18.1 ppm. ESI-MS:  $m/z$  288  $[\text{M}+1]^+$

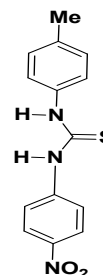**IX.  $^1\text{H}$  &  $^{13}\text{C}$  NMR spectra of the synthesized compounds**

$^1\text{H}$  NMR Spectrum of compound 4a

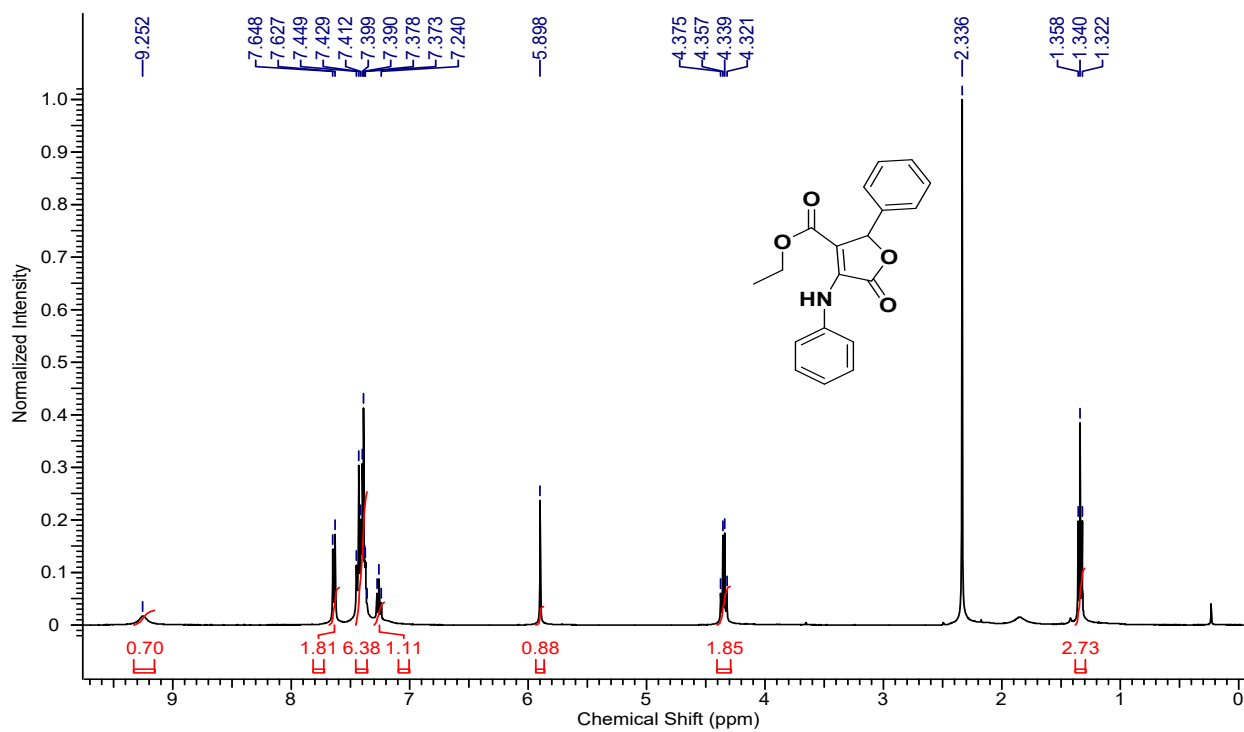

<sup>13</sup>C NMR Spectrum of compound **4a**

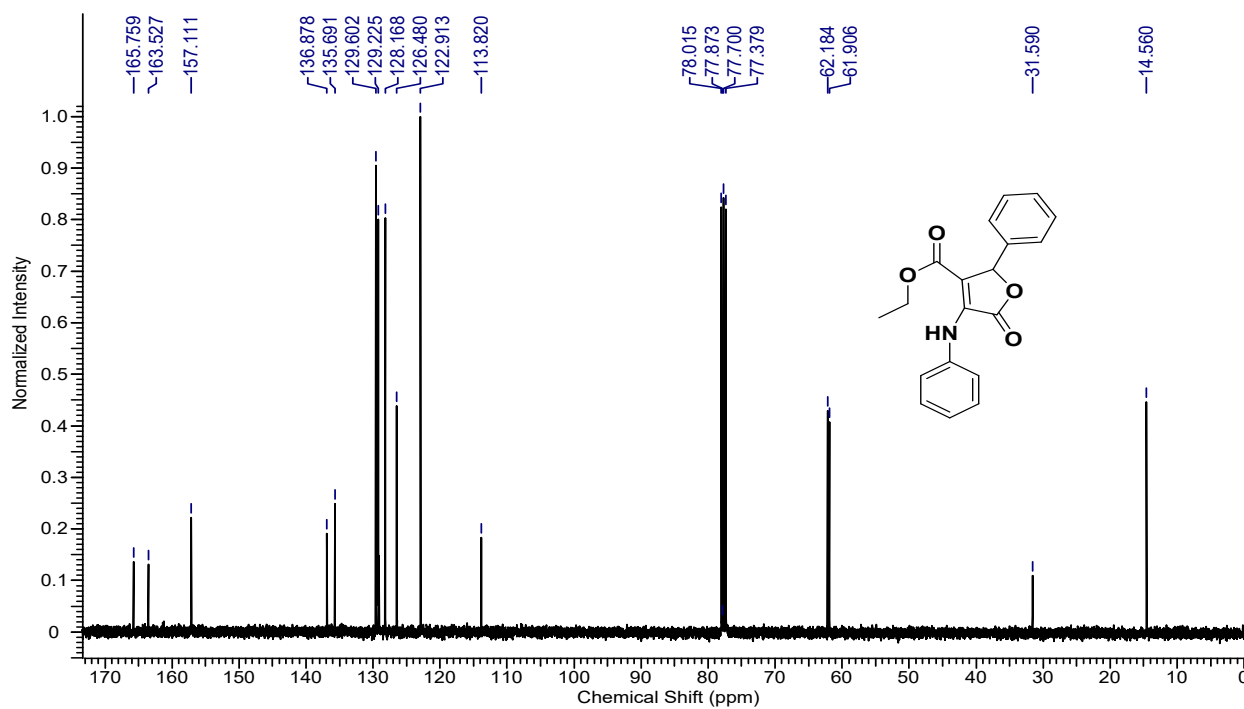

<sup>1</sup>H NMR Spectrum of compound **4b**

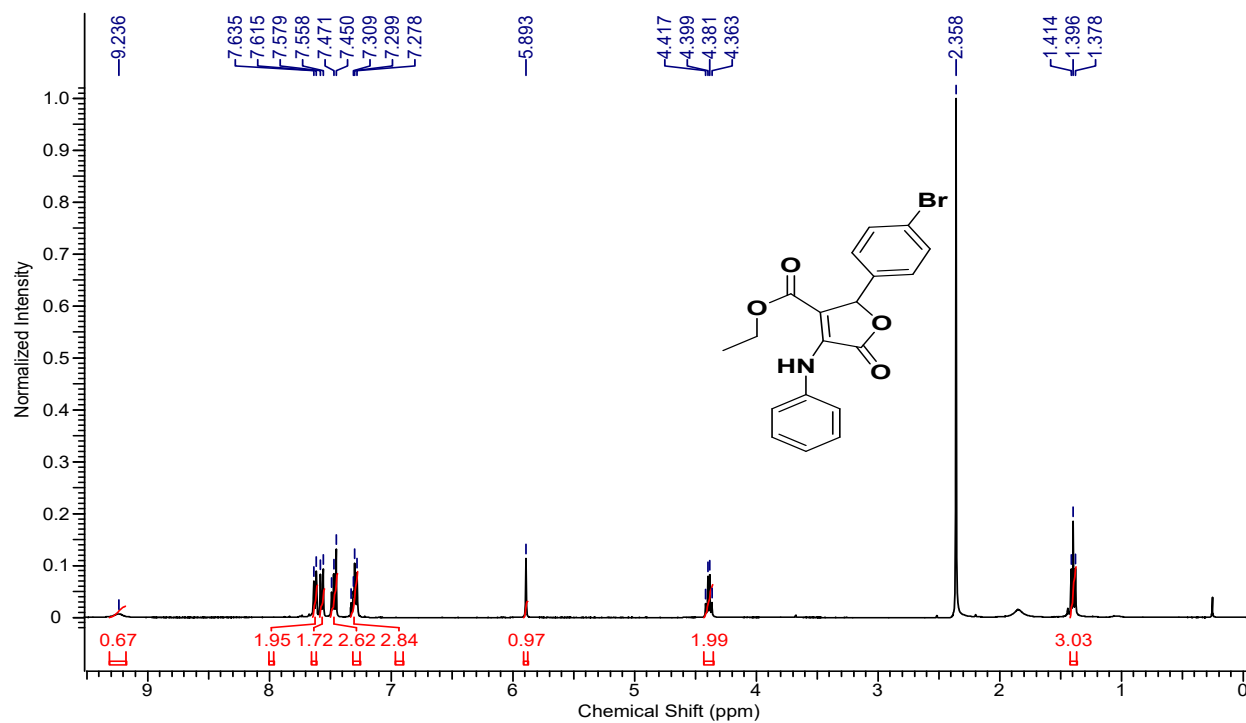<sup>13</sup>C NMR Spectrum of compound **4b**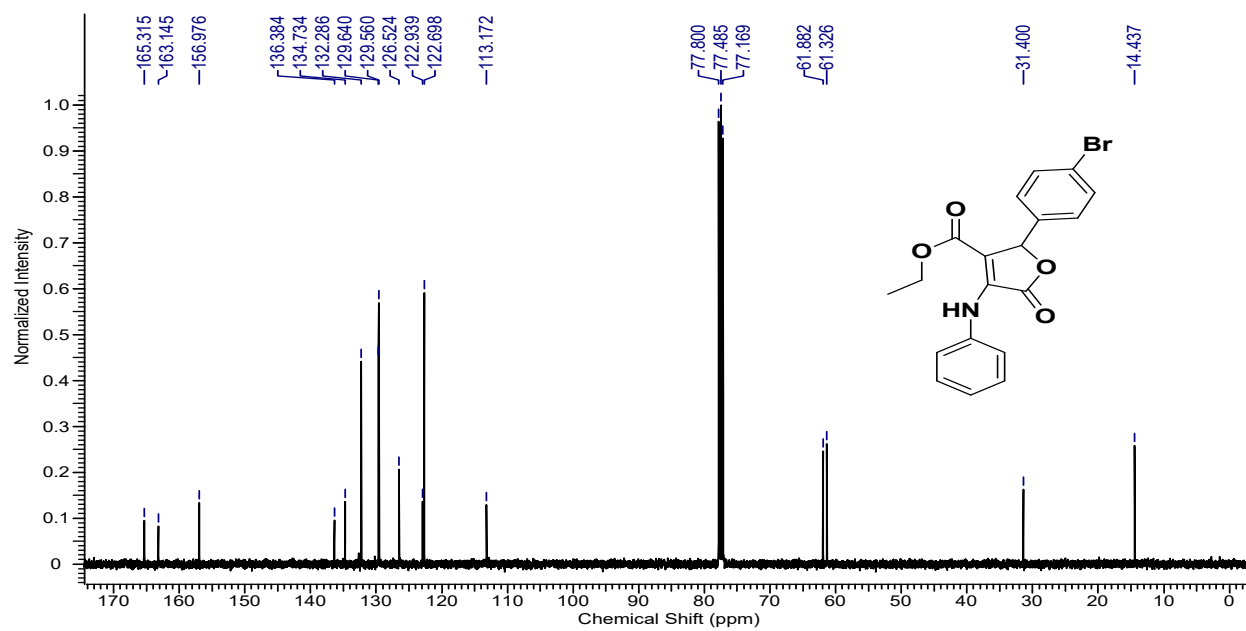<sup>1</sup>H NMR Spectrum of compound **4c**

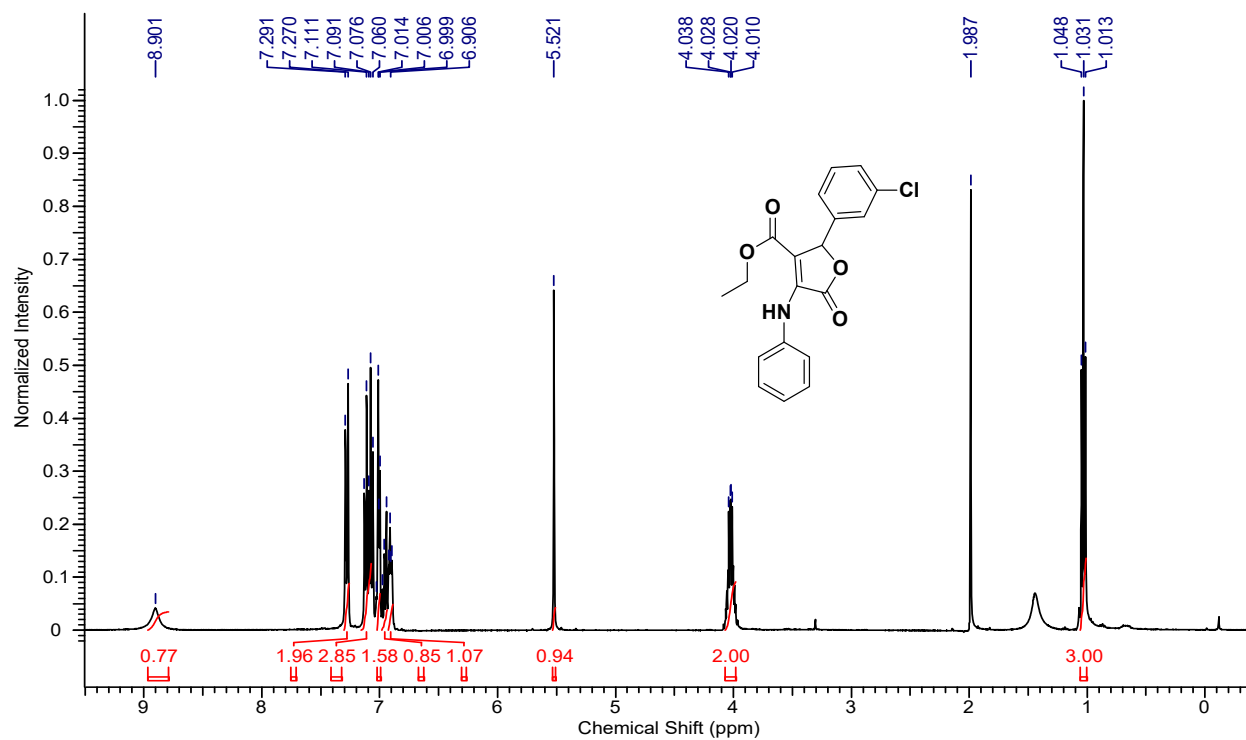

**<sup>13</sup>C NMR Spectrum of compound 4c**

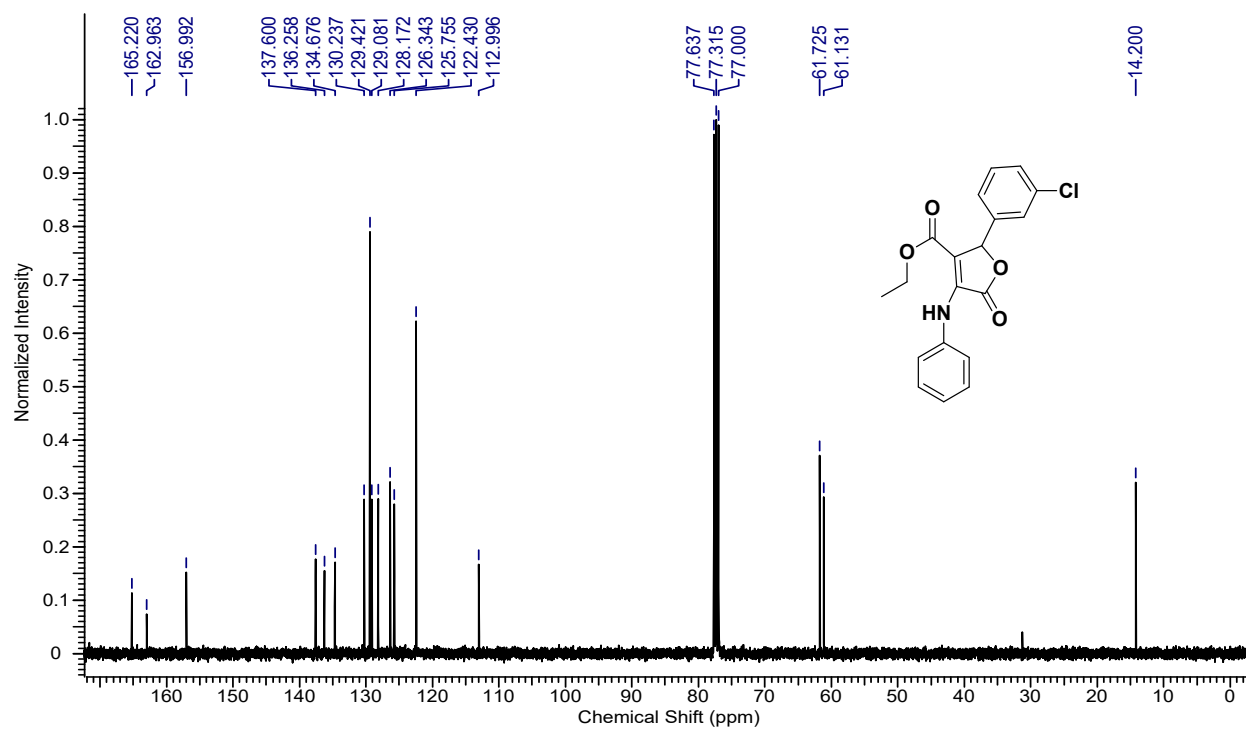

**<sup>1</sup>H NMR Spectrum of compound 4d**

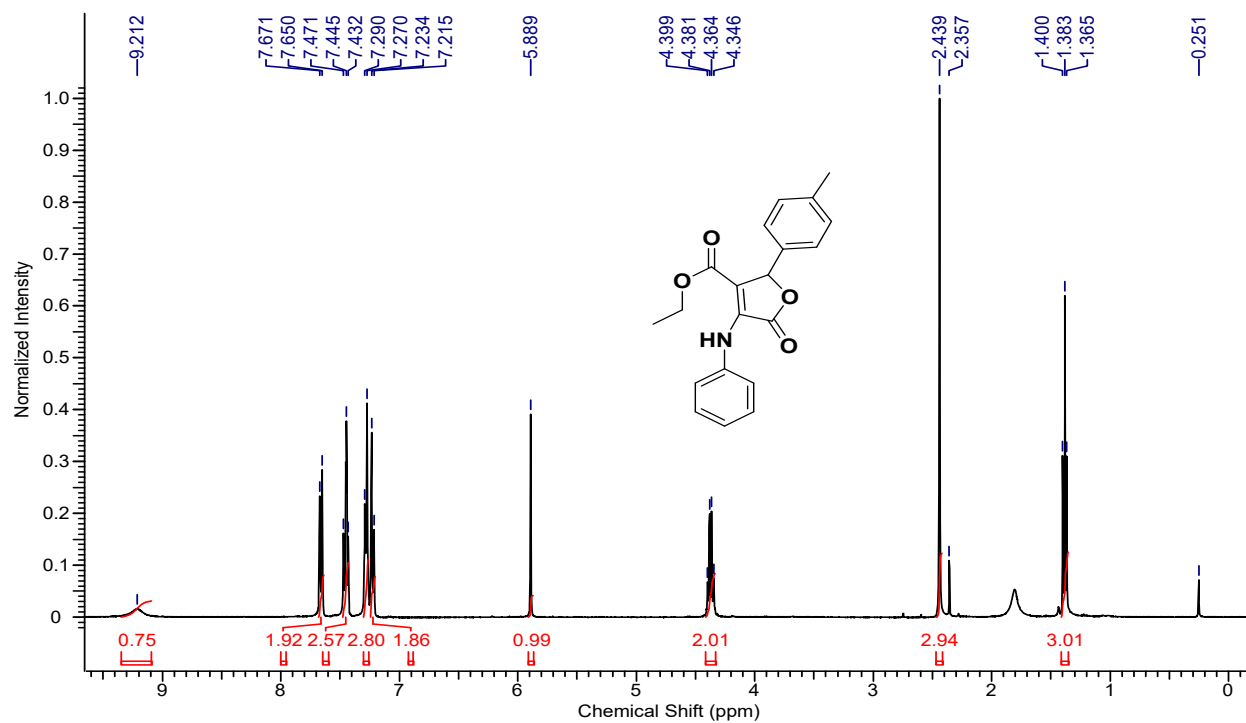

<sup>13</sup>C NMR Spectrum of compound **4d**

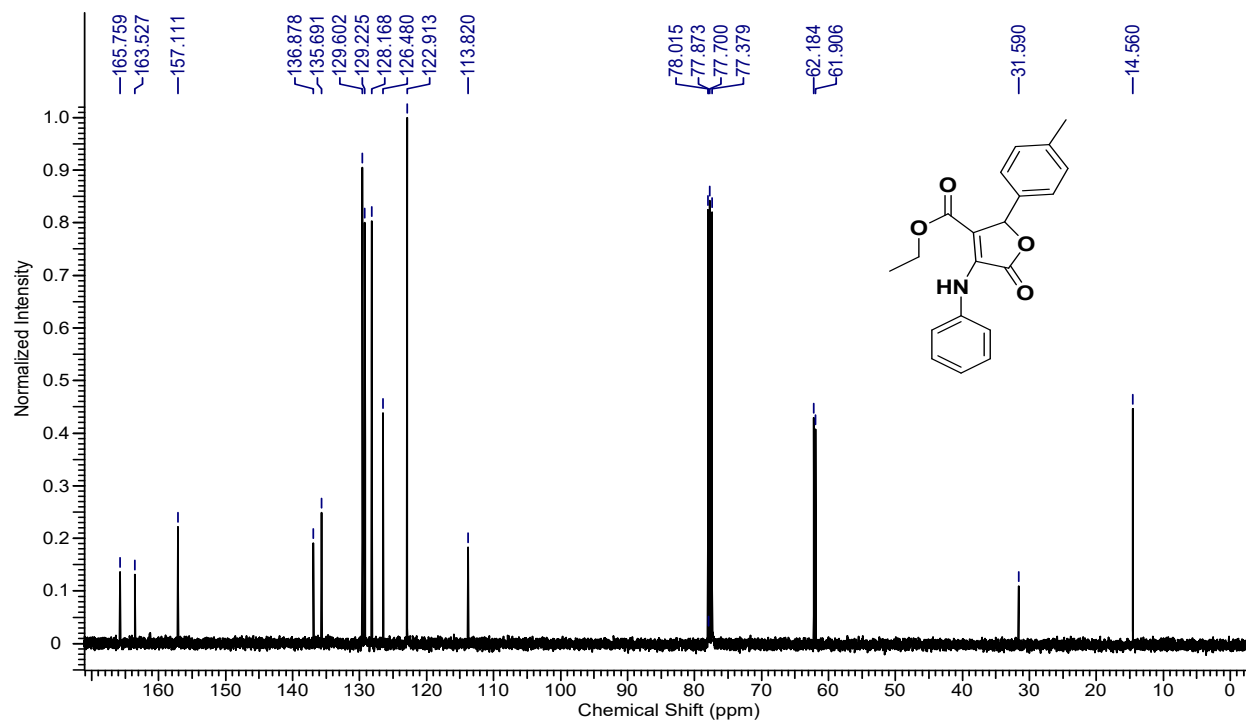

<sup>1</sup>H NMR Spectrum of compound **4e**

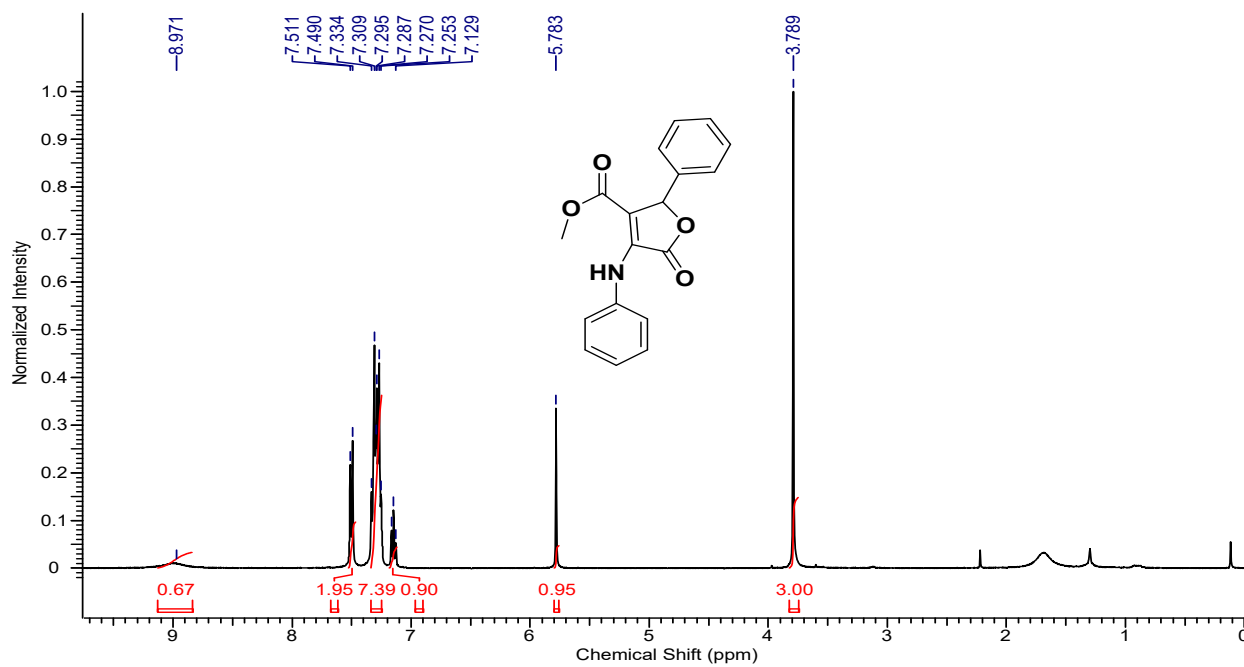<sup>13</sup>C NMR Spectrum of compound 4e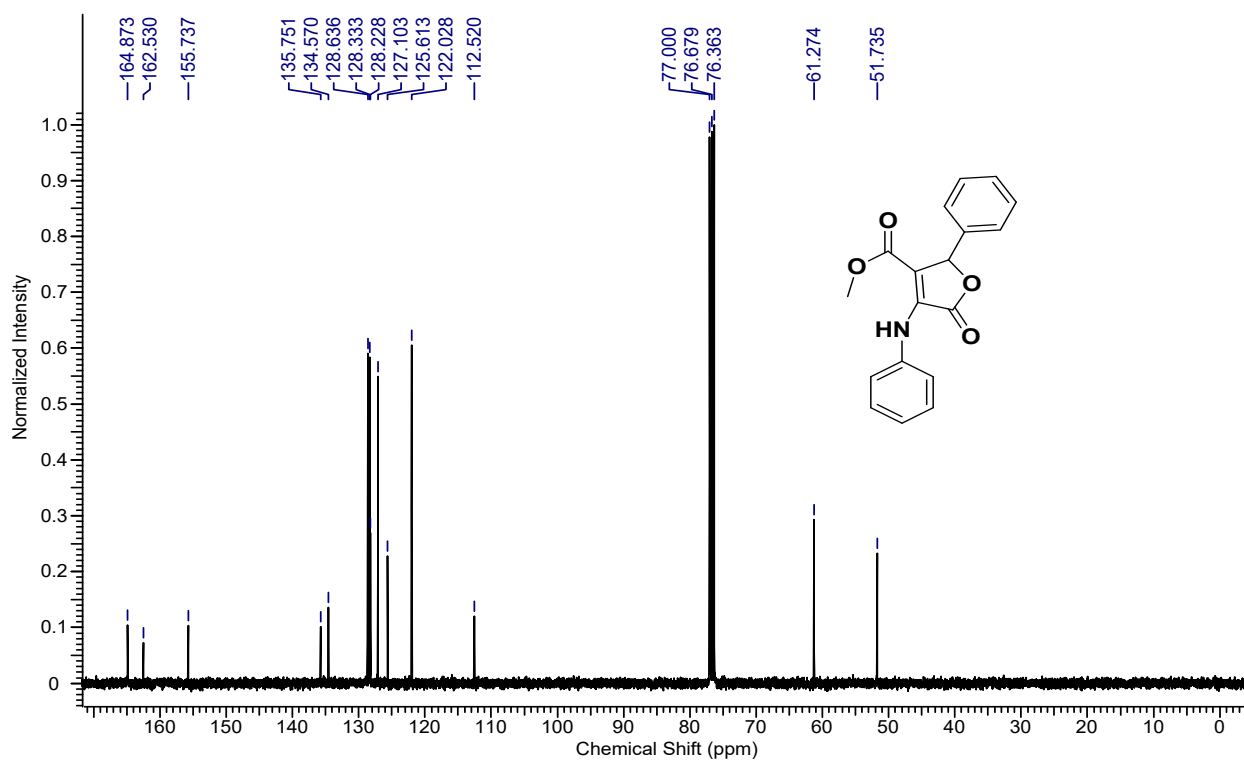<sup>1</sup>H NMR Spectrum of compound 4f

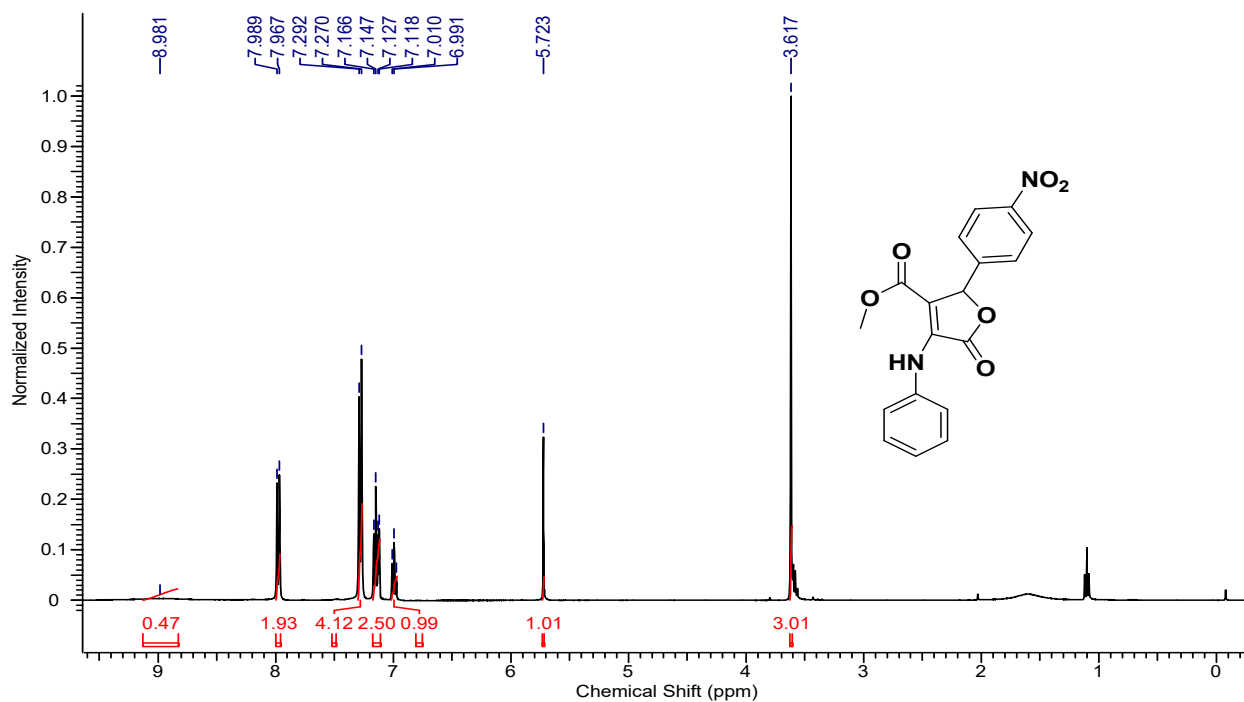<sup>13</sup>C NMR Spectrum of compound **4f**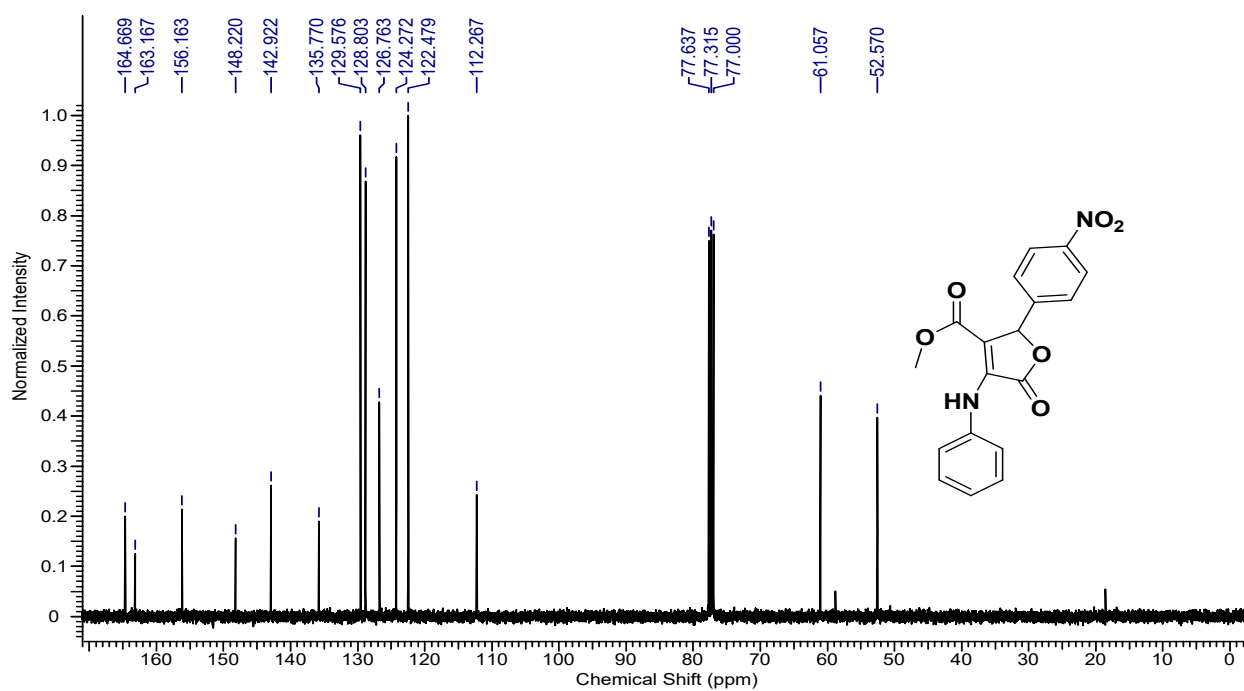<sup>1</sup>H NMR Spectrum of compound **4g**

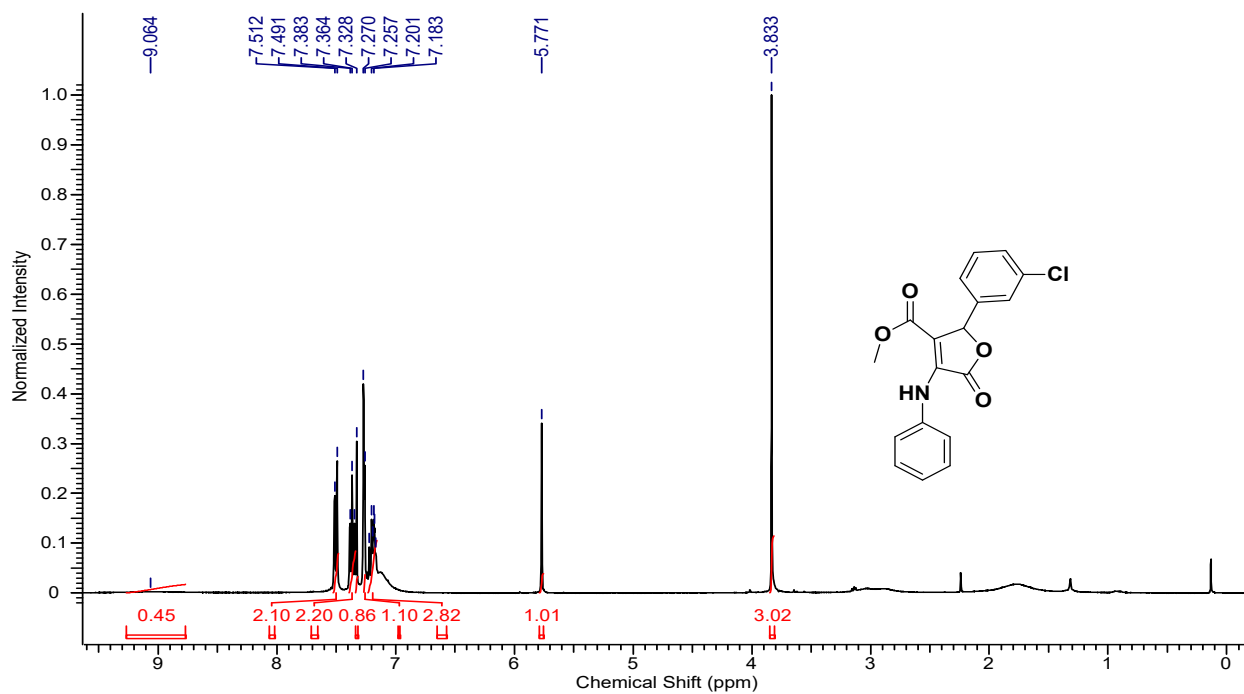

**<sup>13</sup>C NMR Spectrum of compound 4g**

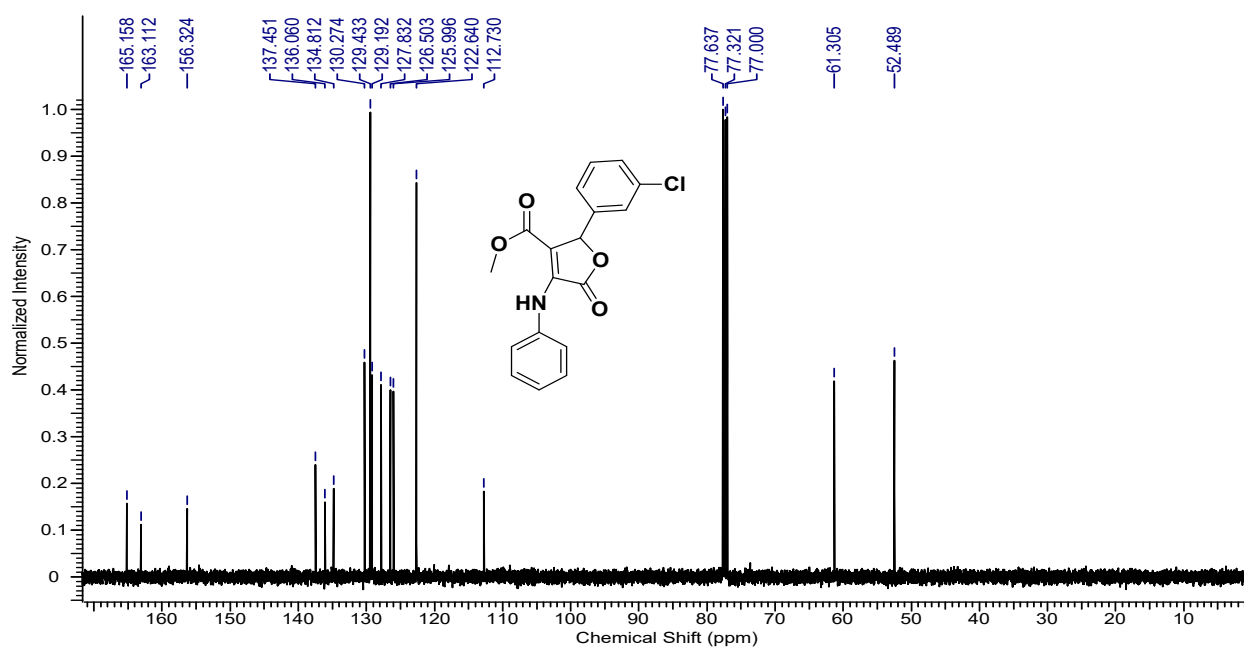

**<sup>1</sup>H NMR Spectrum of compound 4h**



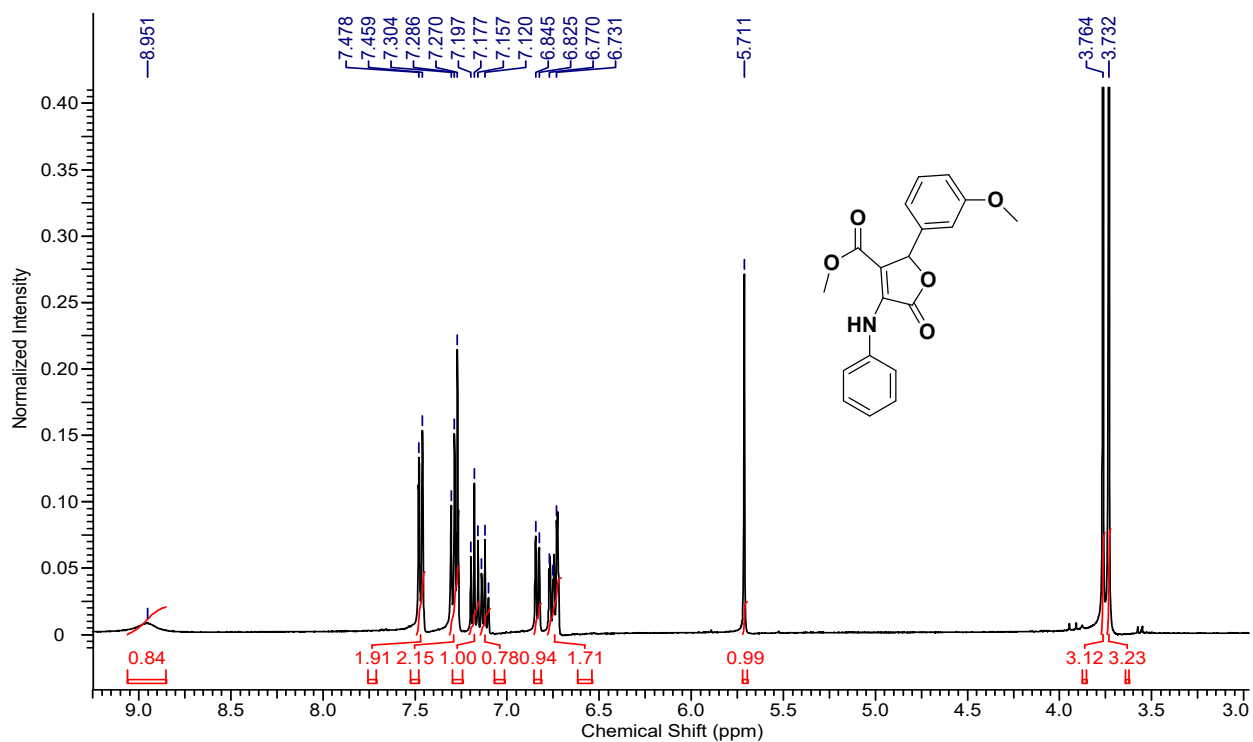

<sup>13</sup>C NMR Spectrum of compound **4h**

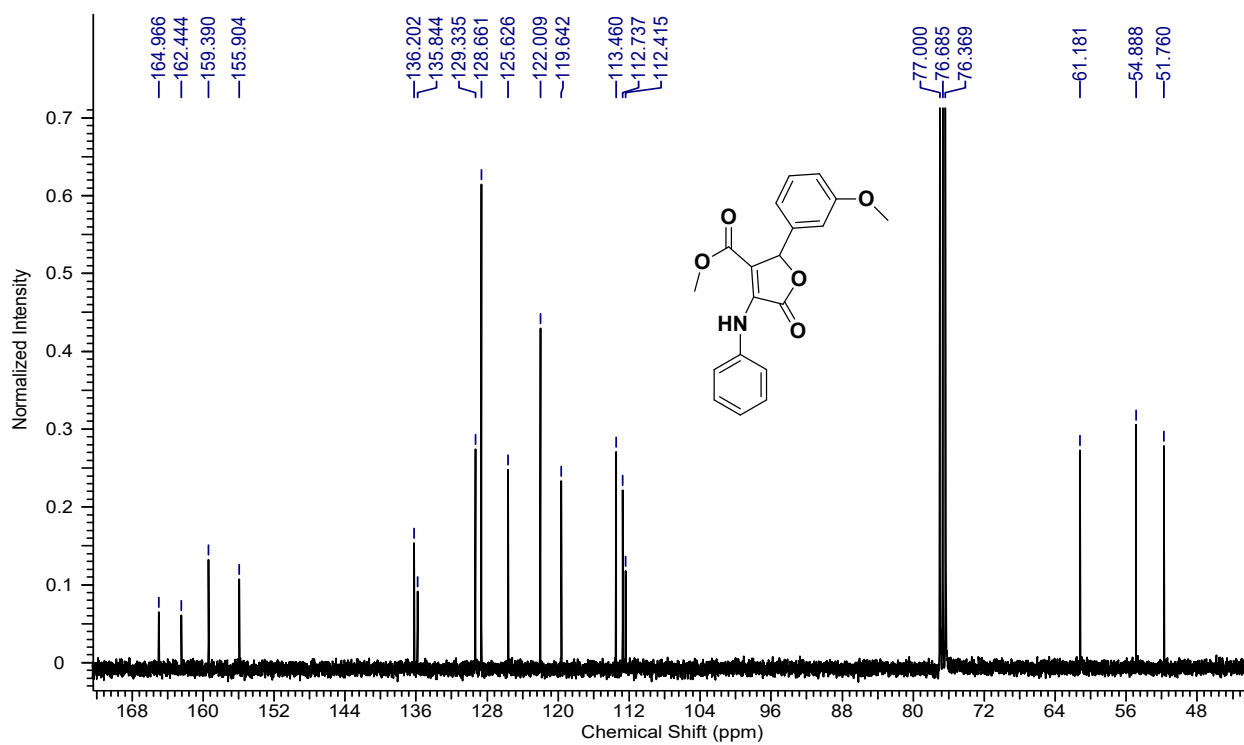

<sup>1</sup>H NMR Spectrum of compound **4i**

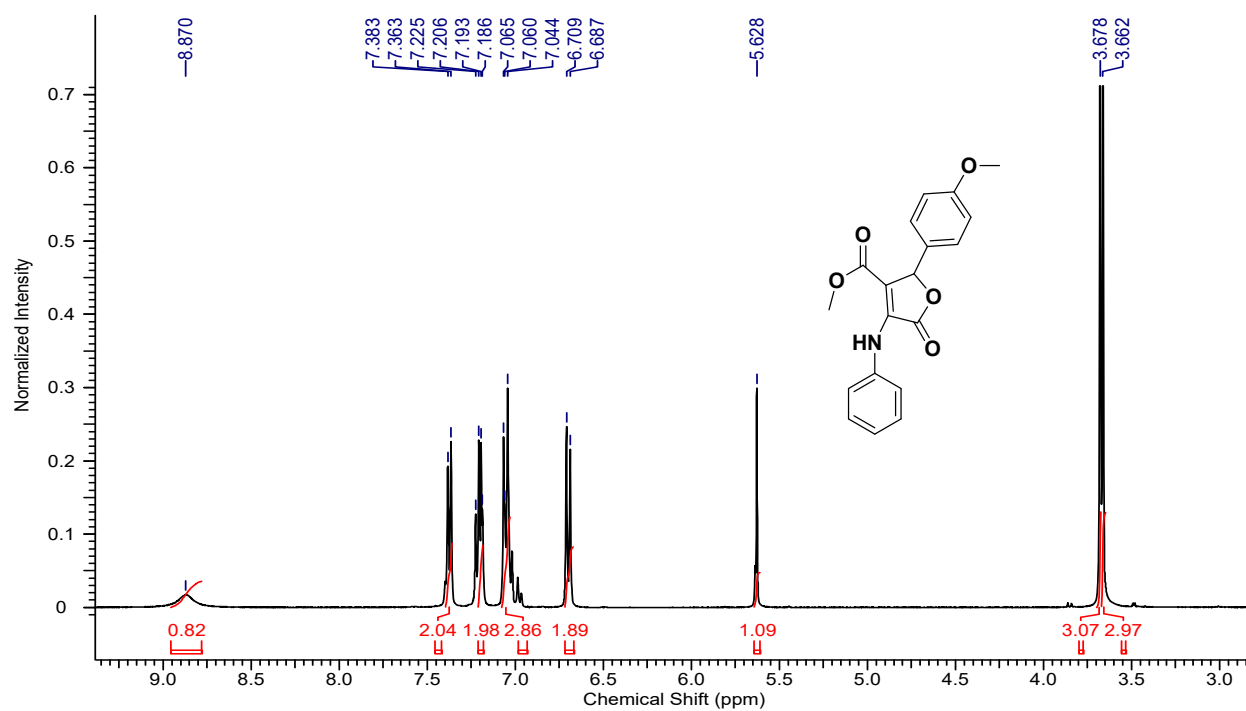<sup>13</sup>C NMR Spectrum of compound **4i**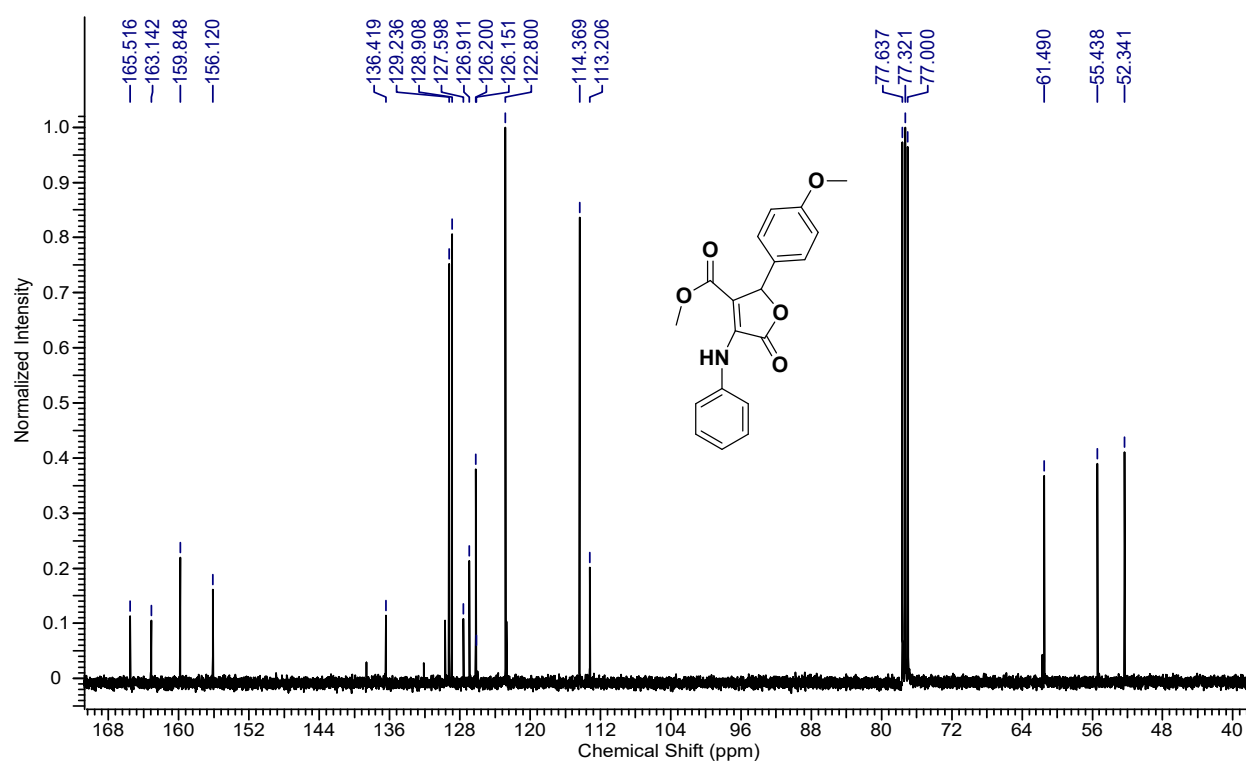<sup>1</sup>H NMR Spectrum of compound **4j**

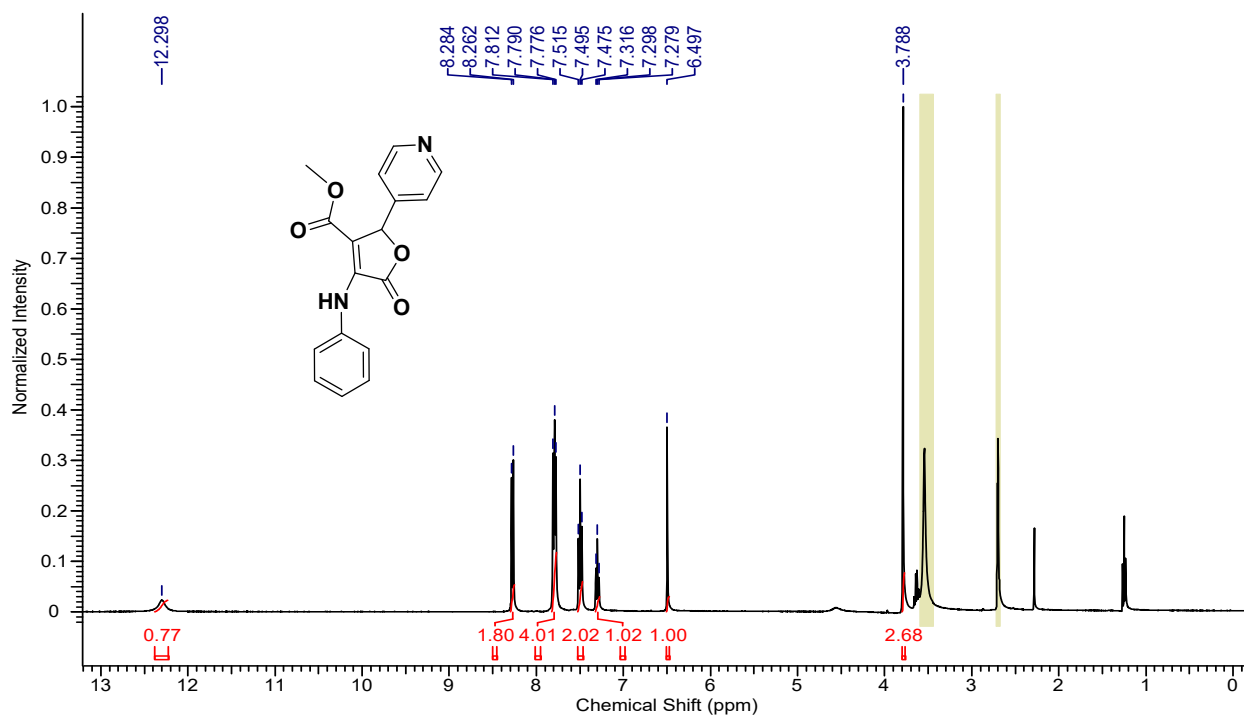

**<sup>13</sup>C NMR Spectrum of compound 4j**

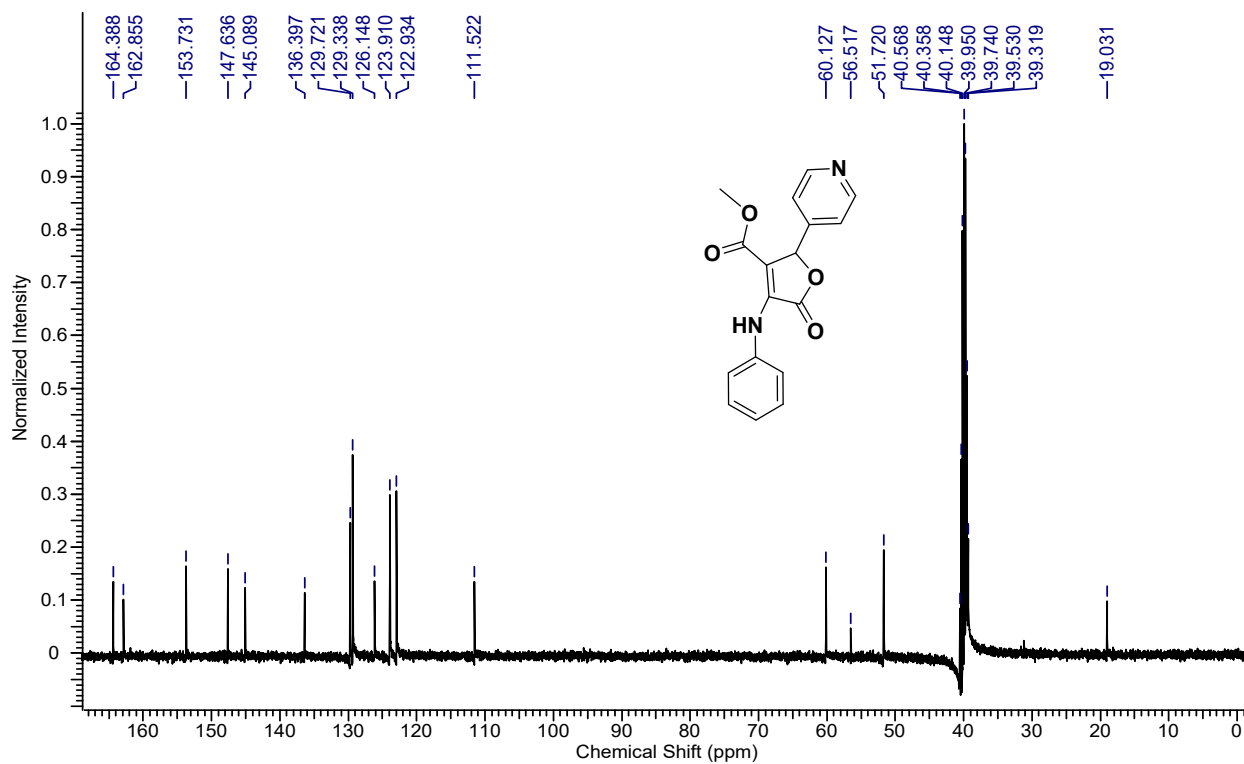

**<sup>1</sup>H NMR Spectrum of compound 4k**

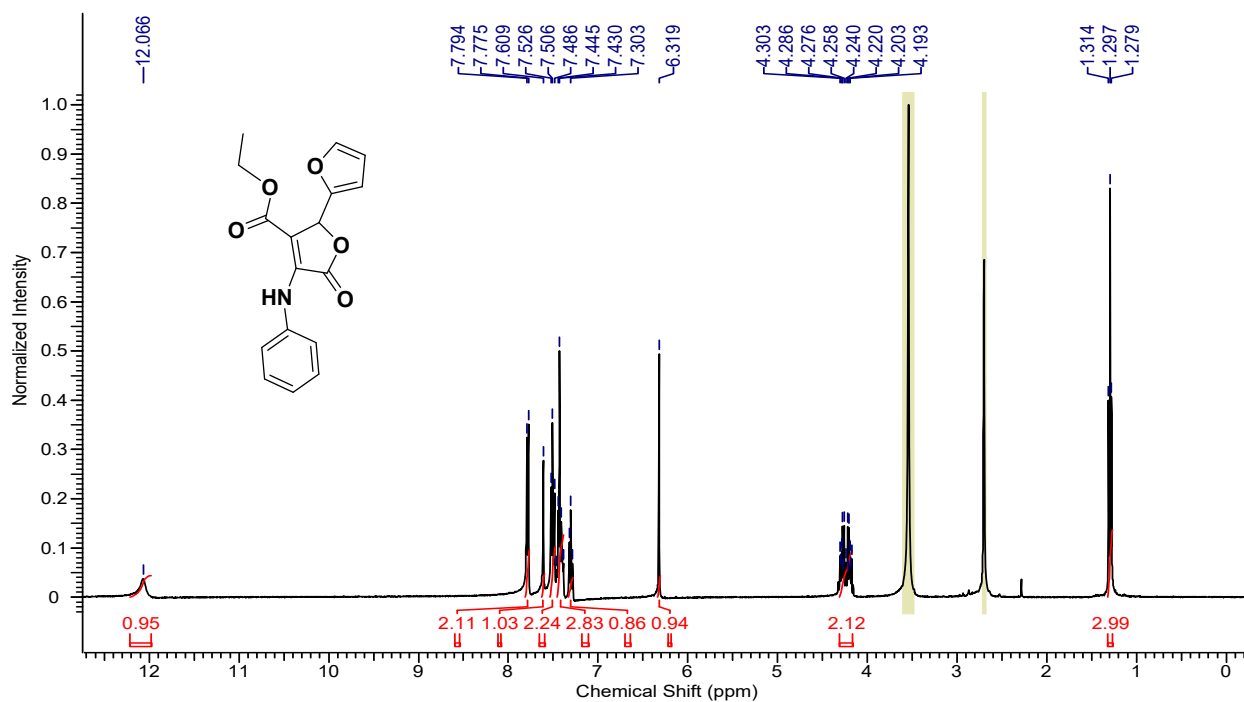<sup>13</sup>C NMR Spectrum of compound **4k**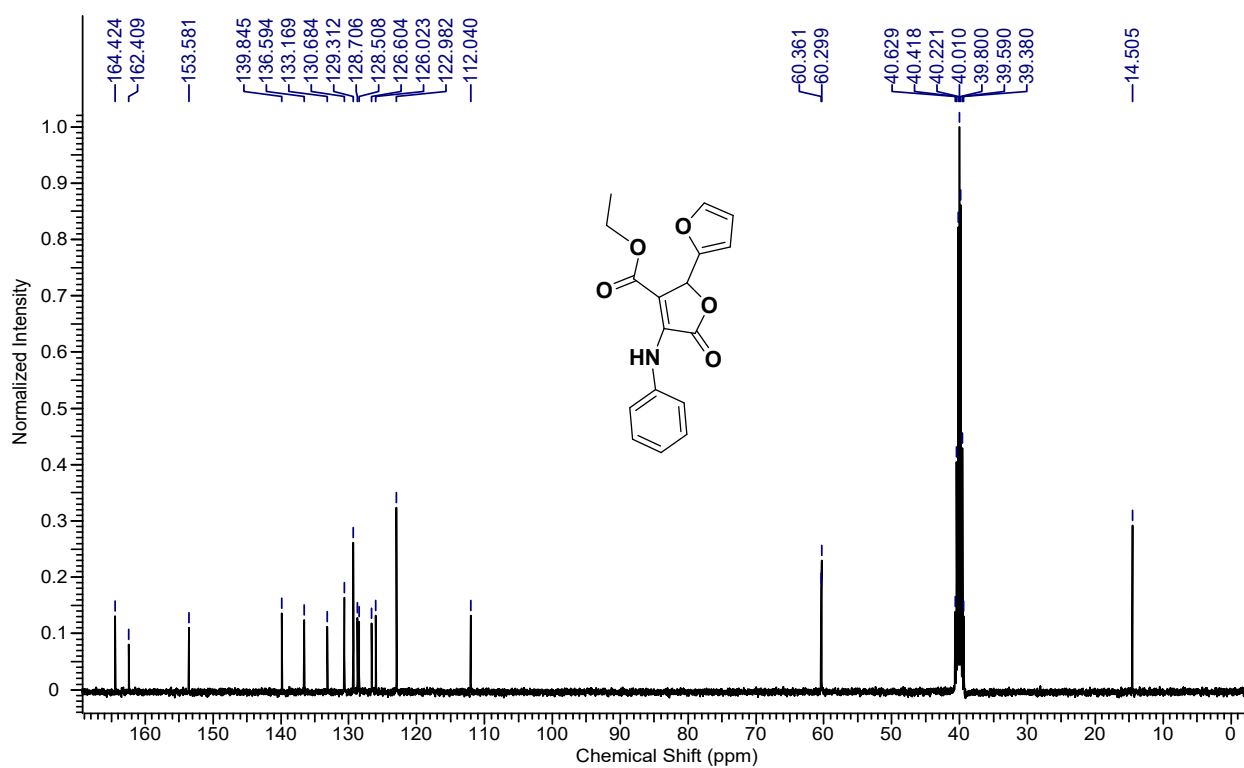<sup>1</sup>H NMR Spectrum of compound **4l**

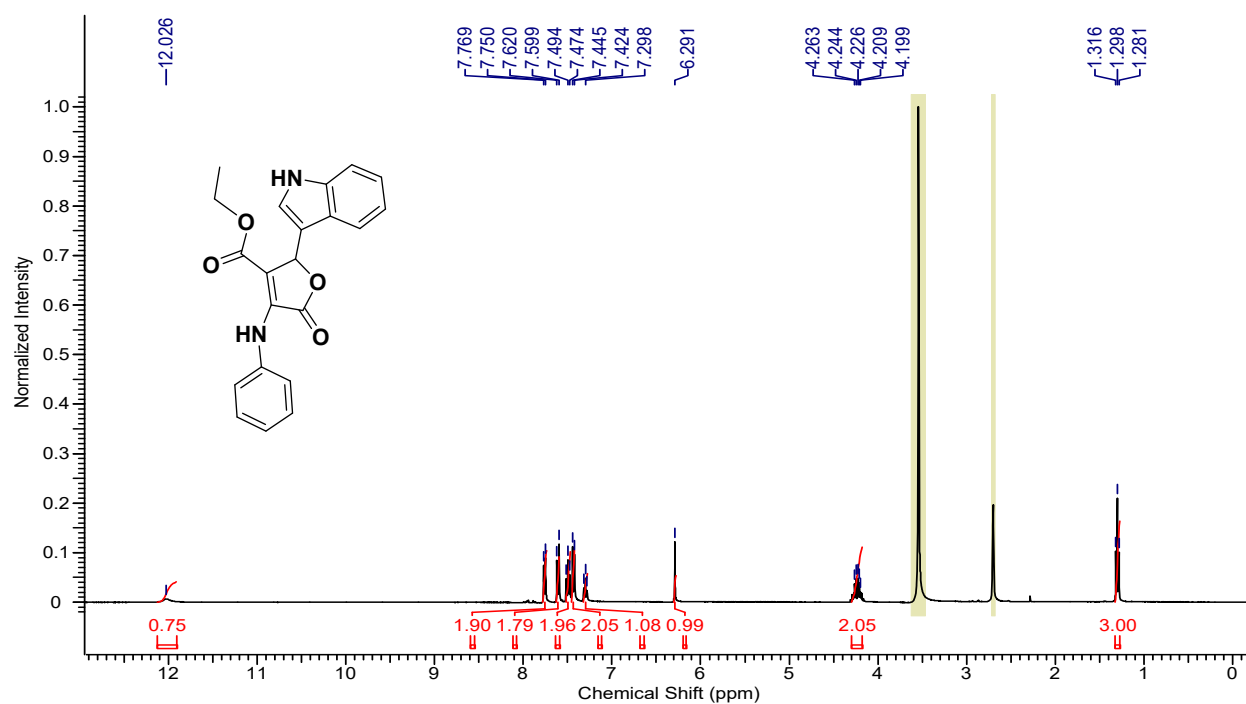

**<sup>13</sup>C NMR Spectrum of compound 4l**

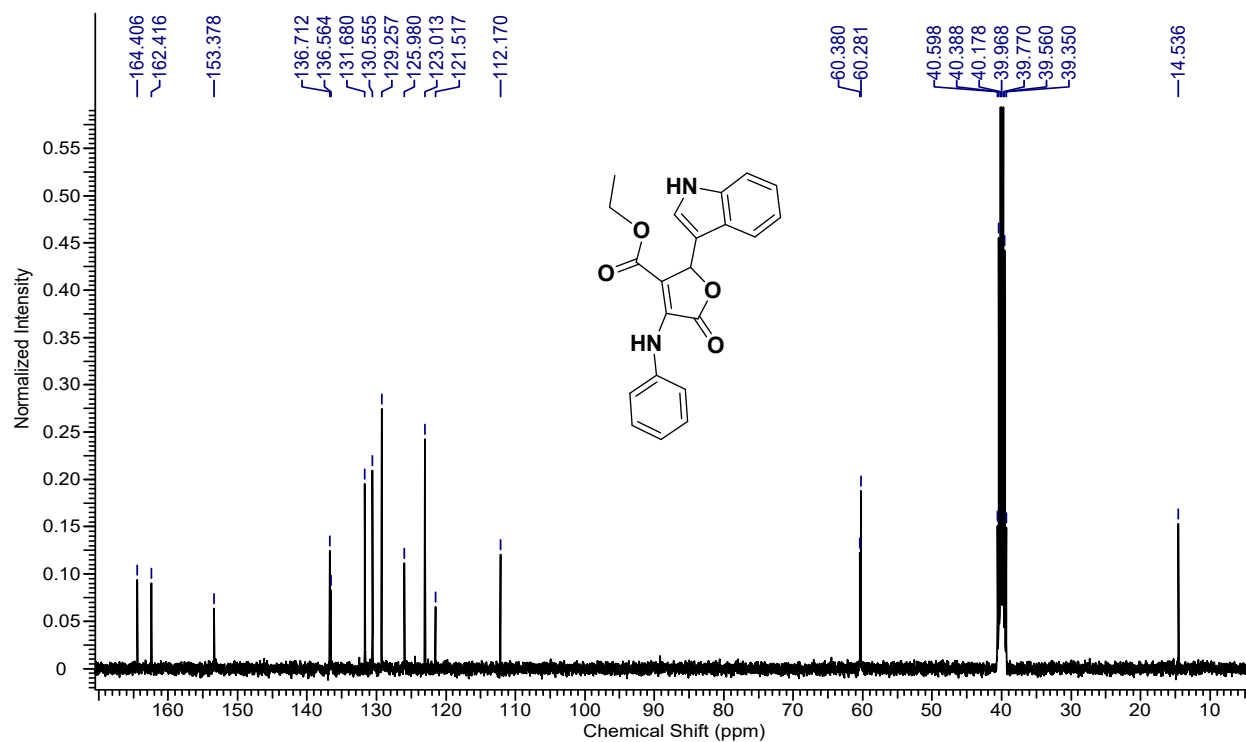

**<sup>1</sup>H NMR Spectrum of compound 4m**

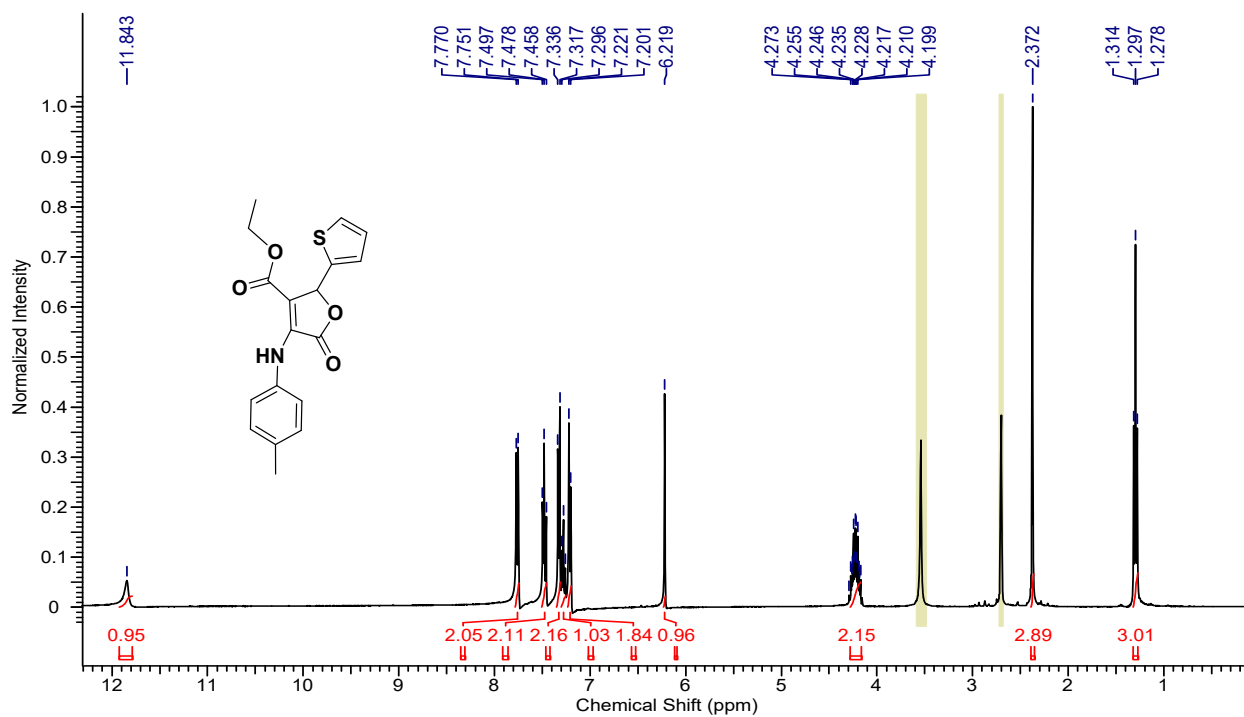

**<sup>13</sup>C NMR Spectrum of compound 4m**

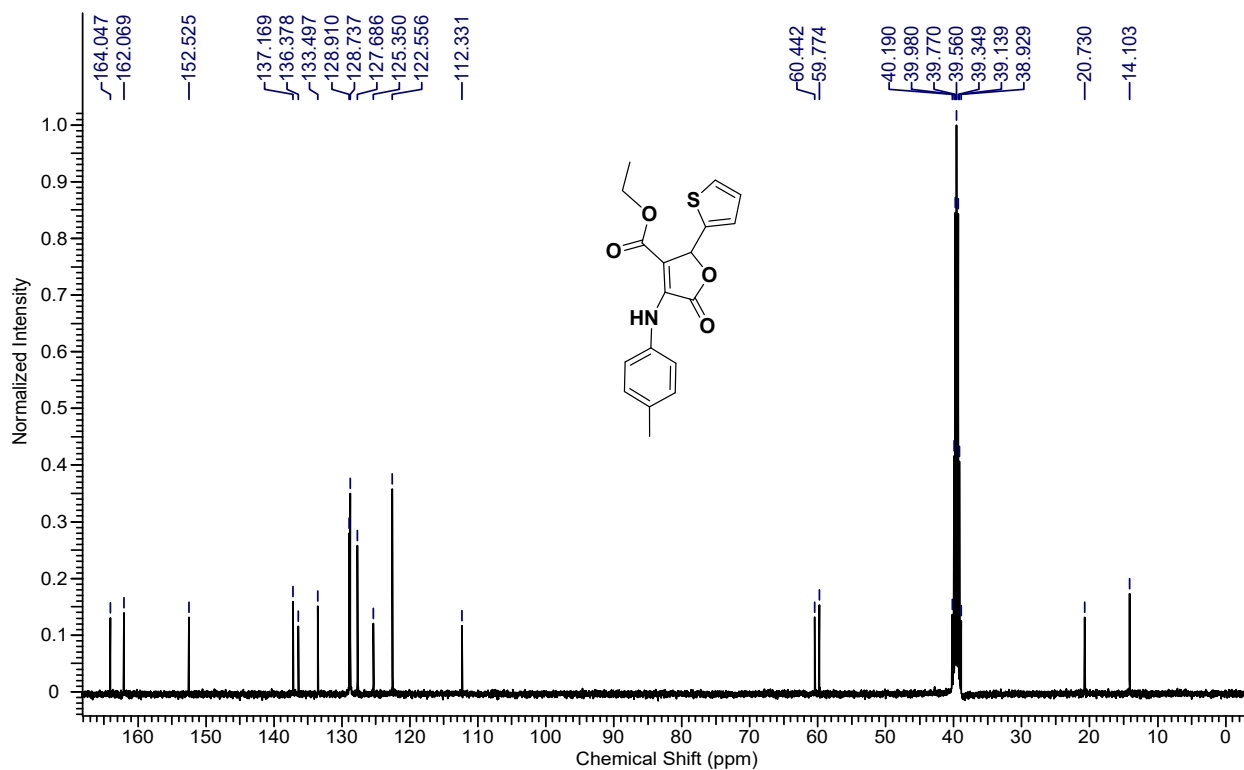

**<sup>1</sup>H NMR Spectrum of compound 4n**

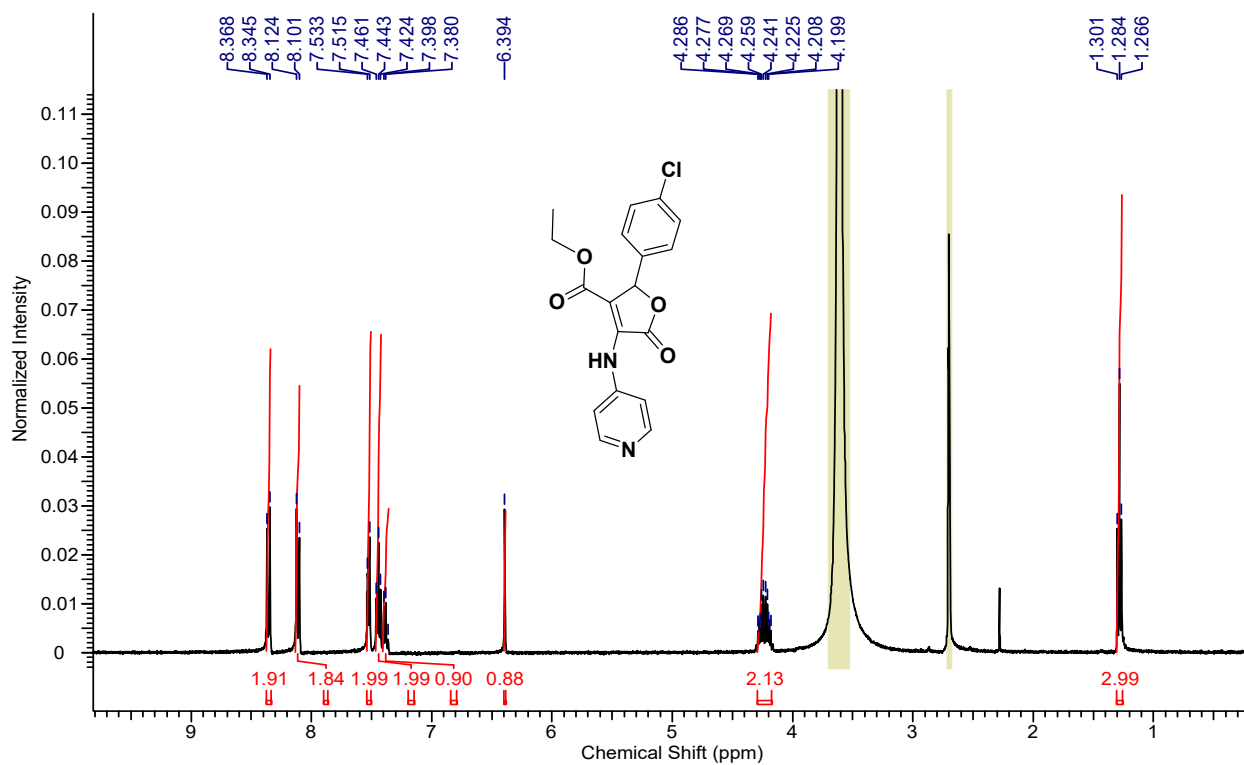

**<sup>13</sup>C NMR Spectrum of compound 4n**

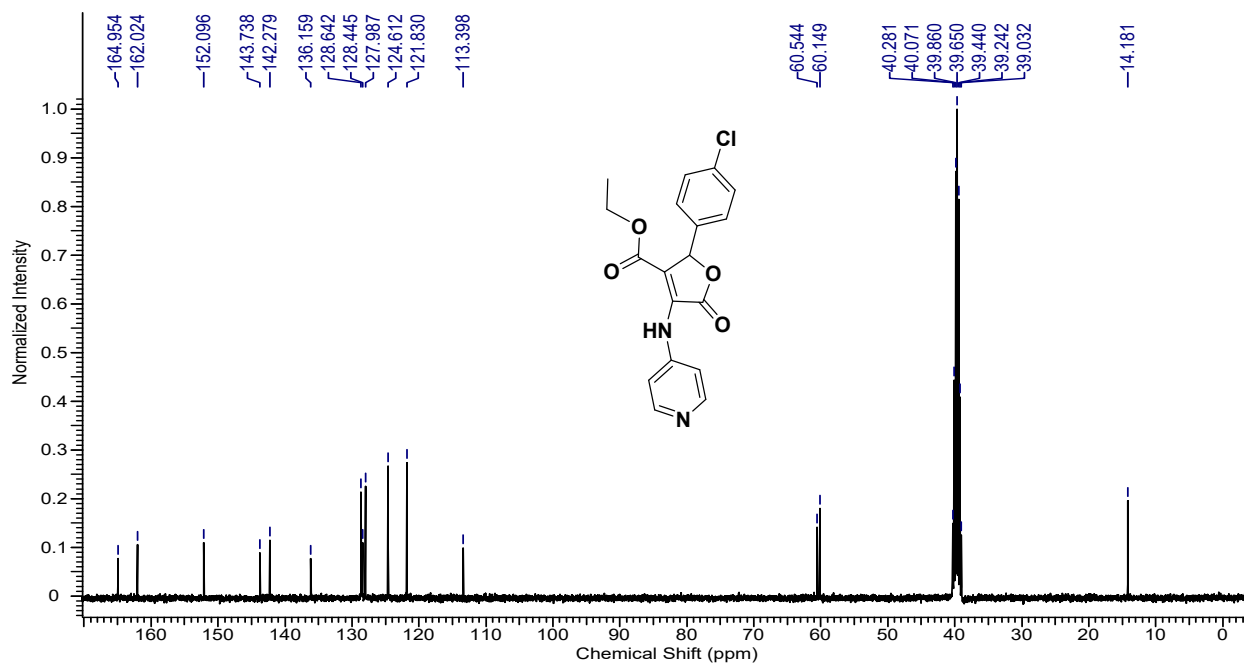

**<sup>1</sup>H NMR Spectrum of compound 4o**

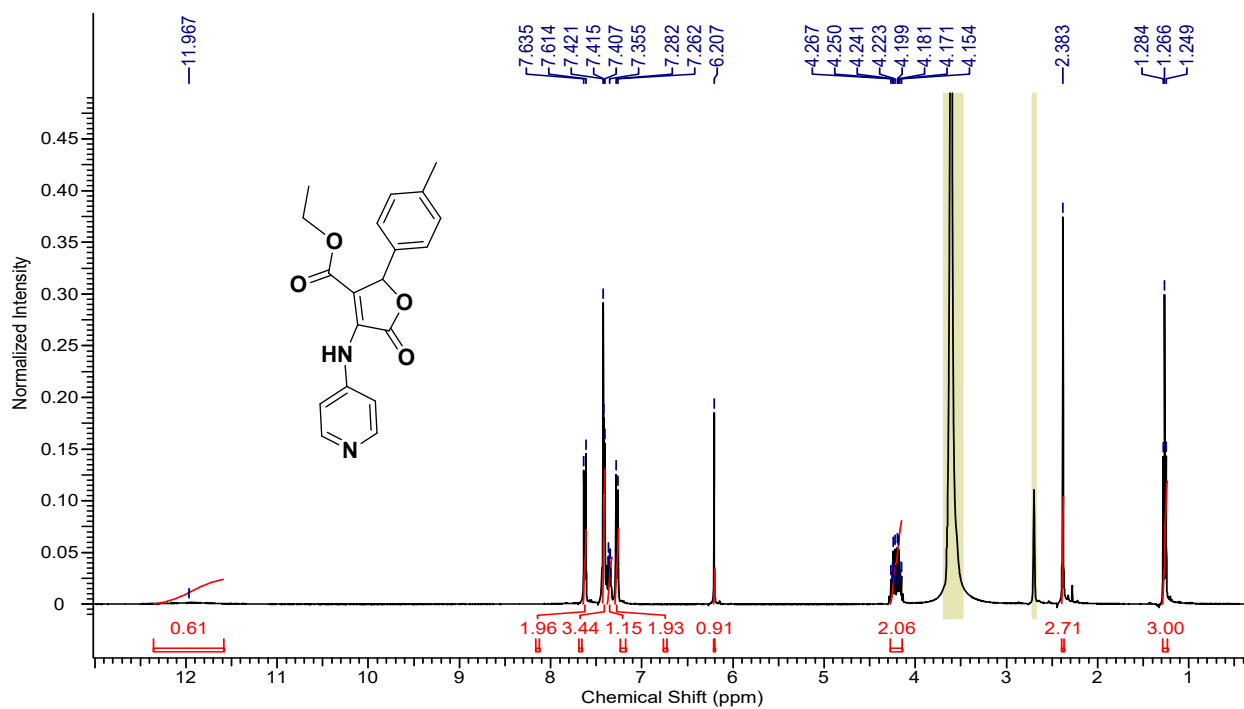

**<sup>13</sup>C NMR Spectrum of compound 4o**

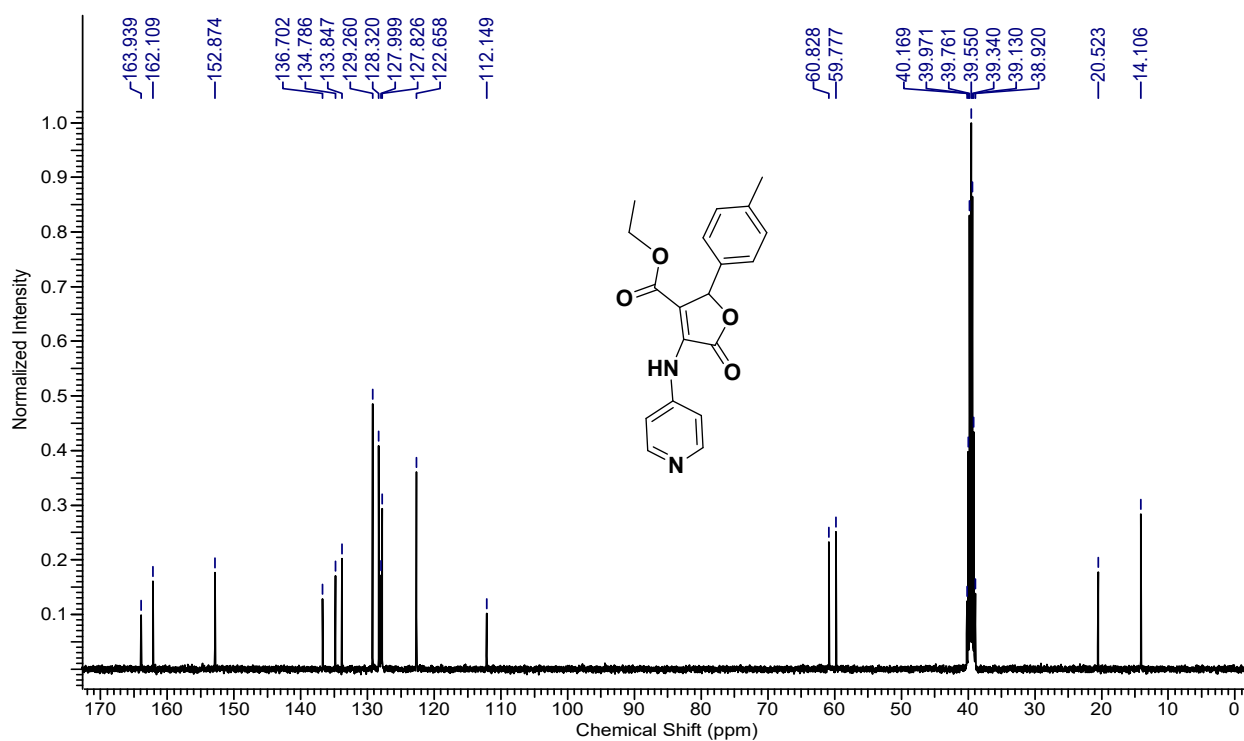

**<sup>1</sup>H NMR Spectrum of compound 4p**



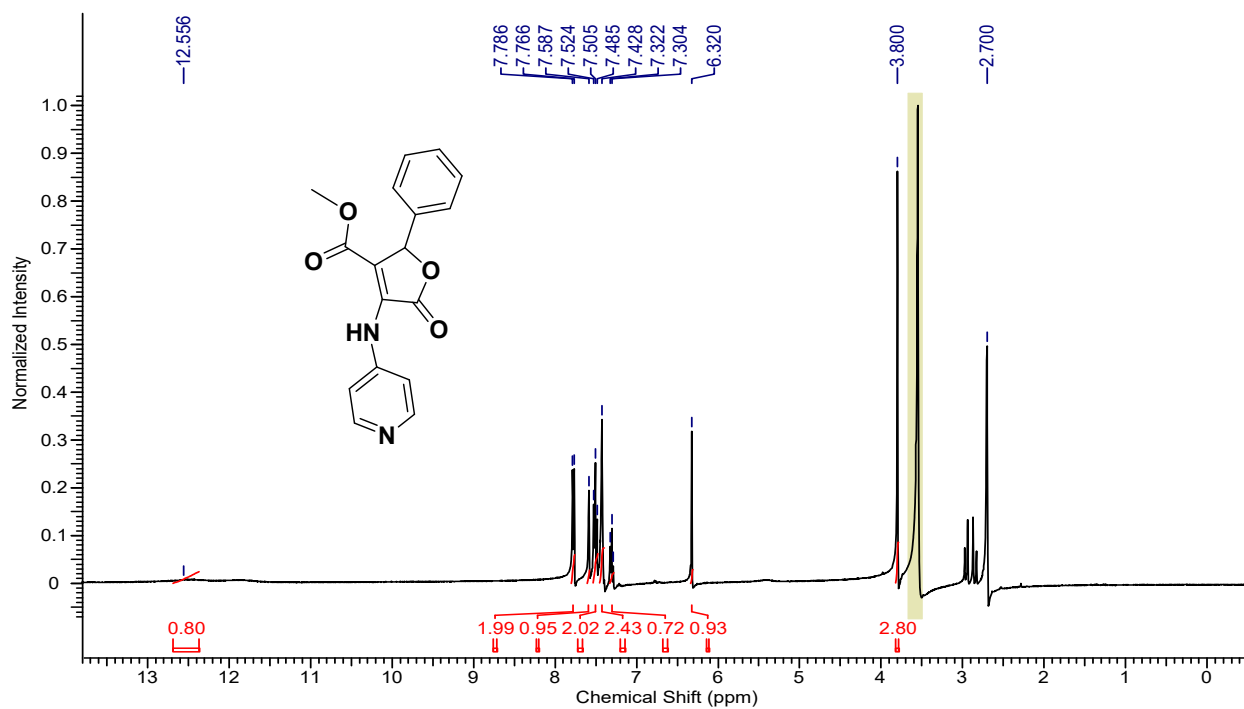

**<sup>13</sup>C NMR Spectrum of compound 4p**

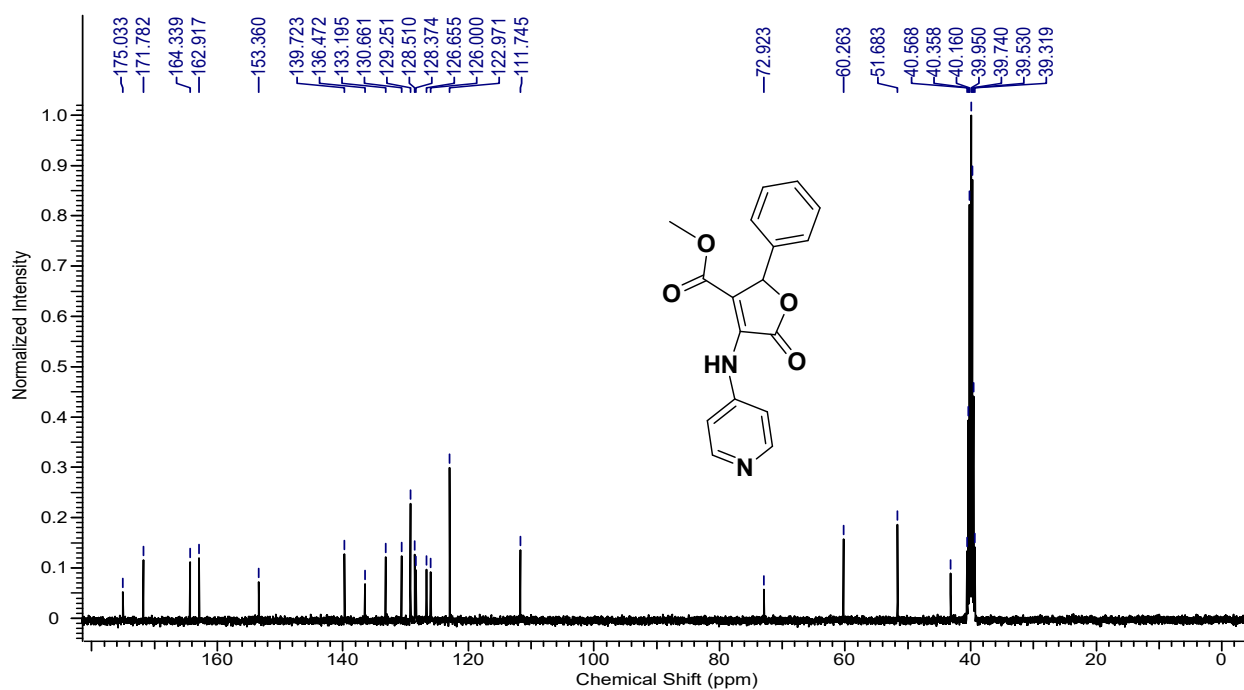

**<sup>1</sup>H NMR Spectrum of compound 4q**

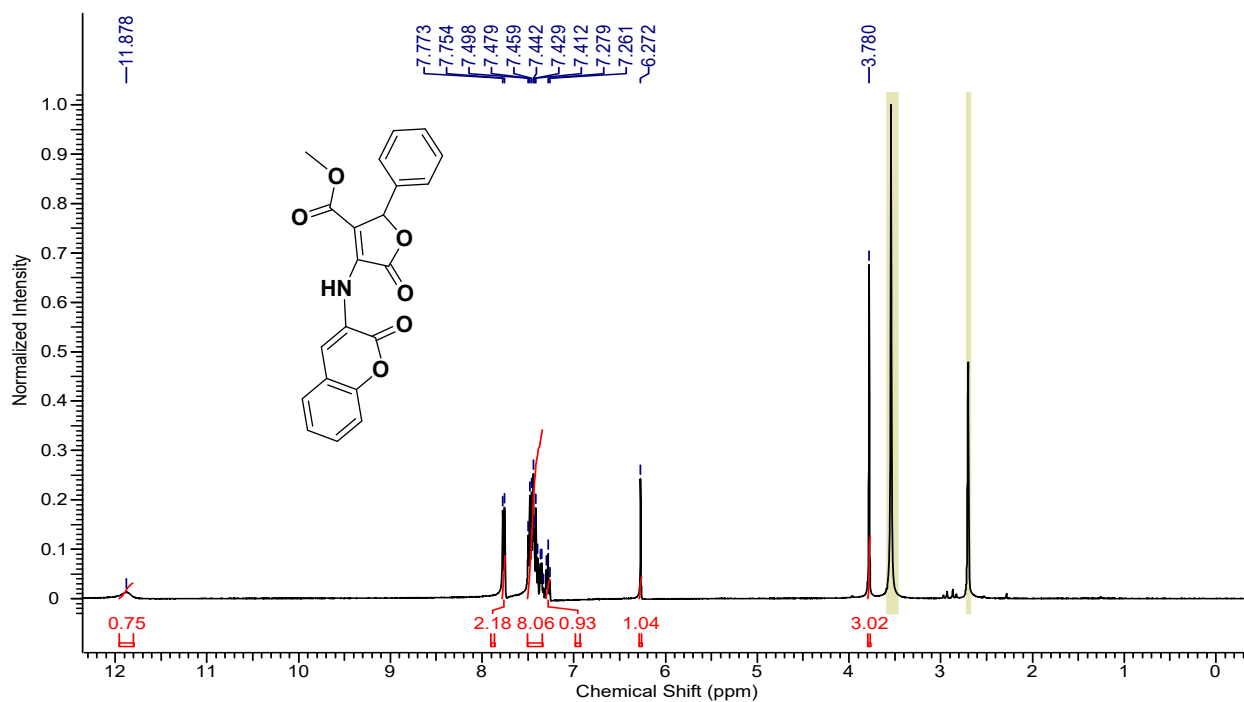<sup>13</sup>C NMR Spectrum of compound **4q**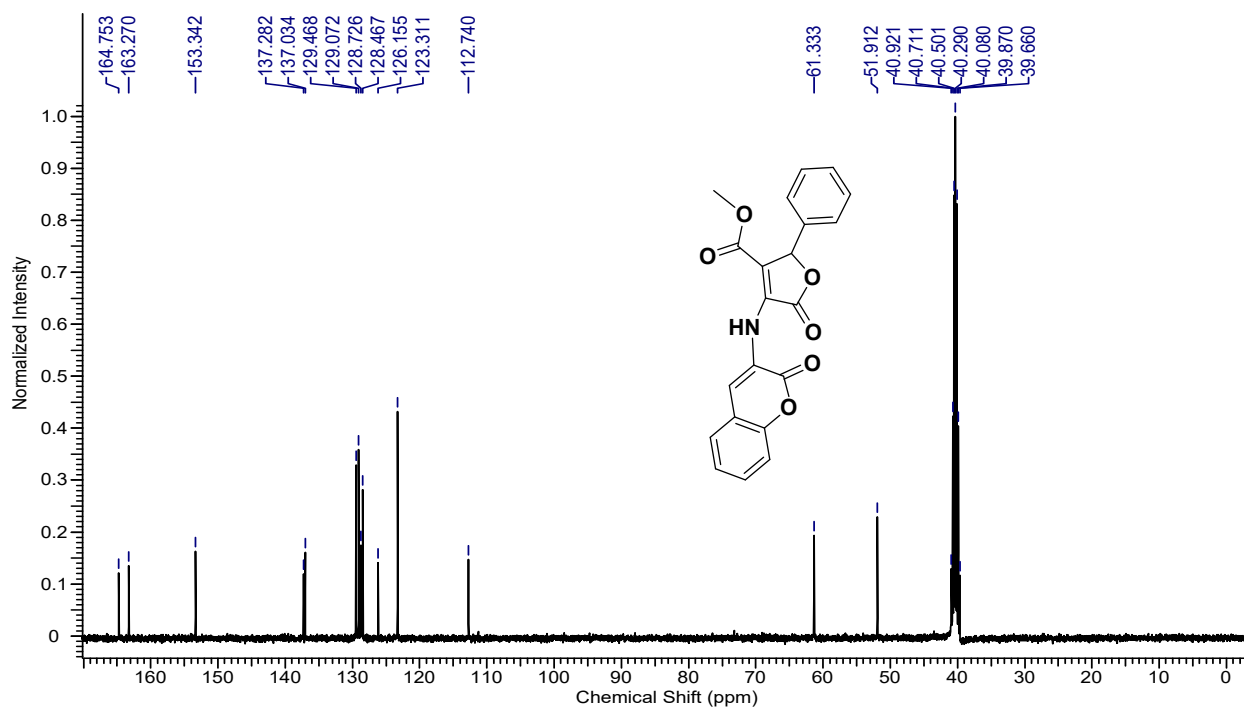<sup>1</sup>H NMR Spectrum of compound **4r**

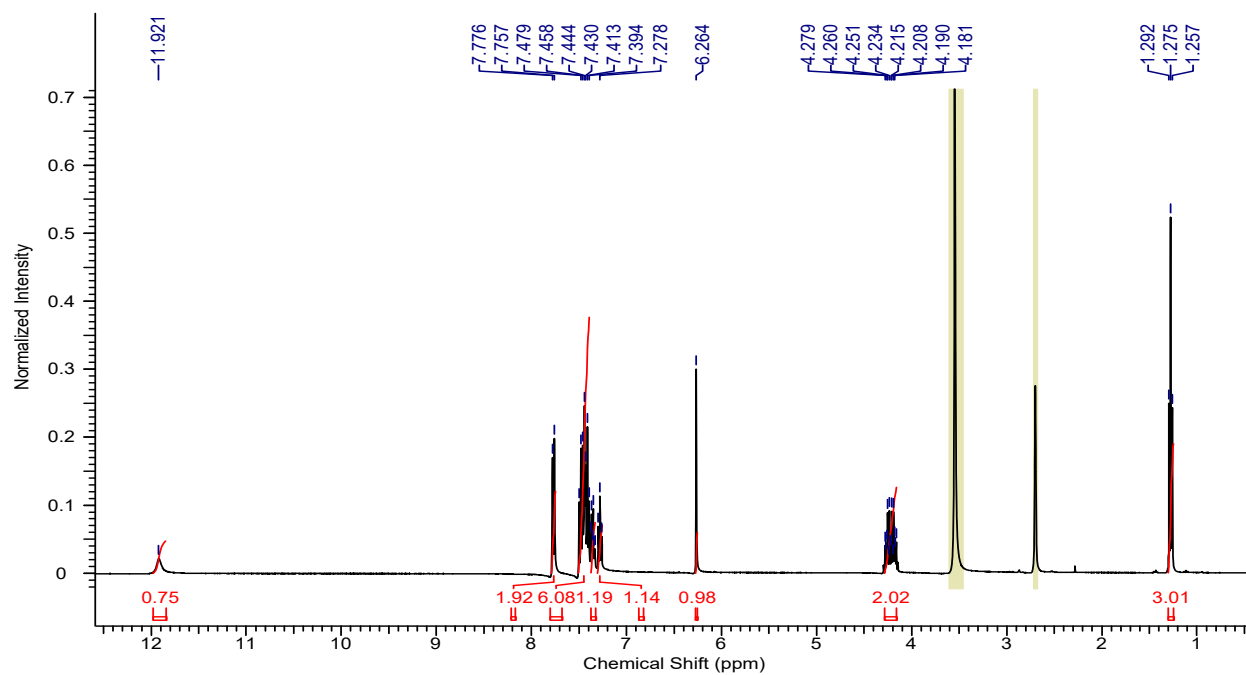

<sup>13</sup>C NMR Spectrum of compound **4r**

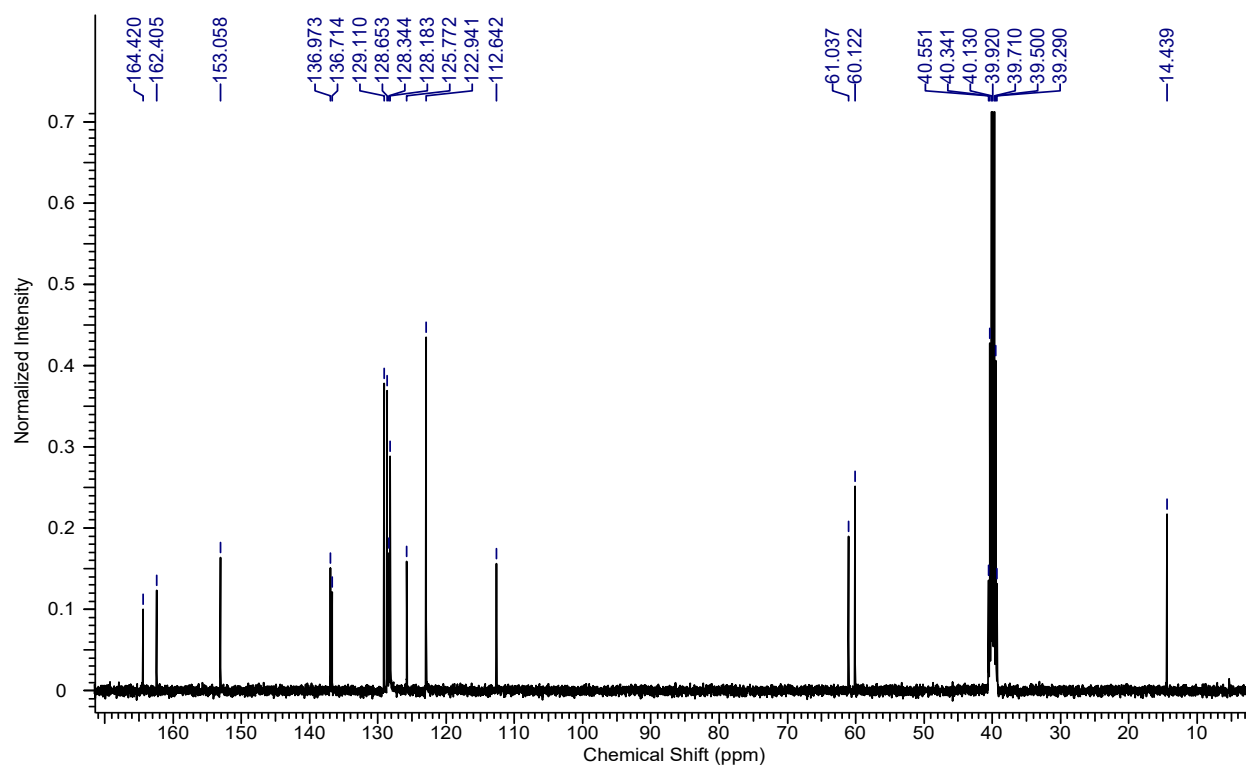

<sup>1</sup>H NMR Spectrum of compound **4s**

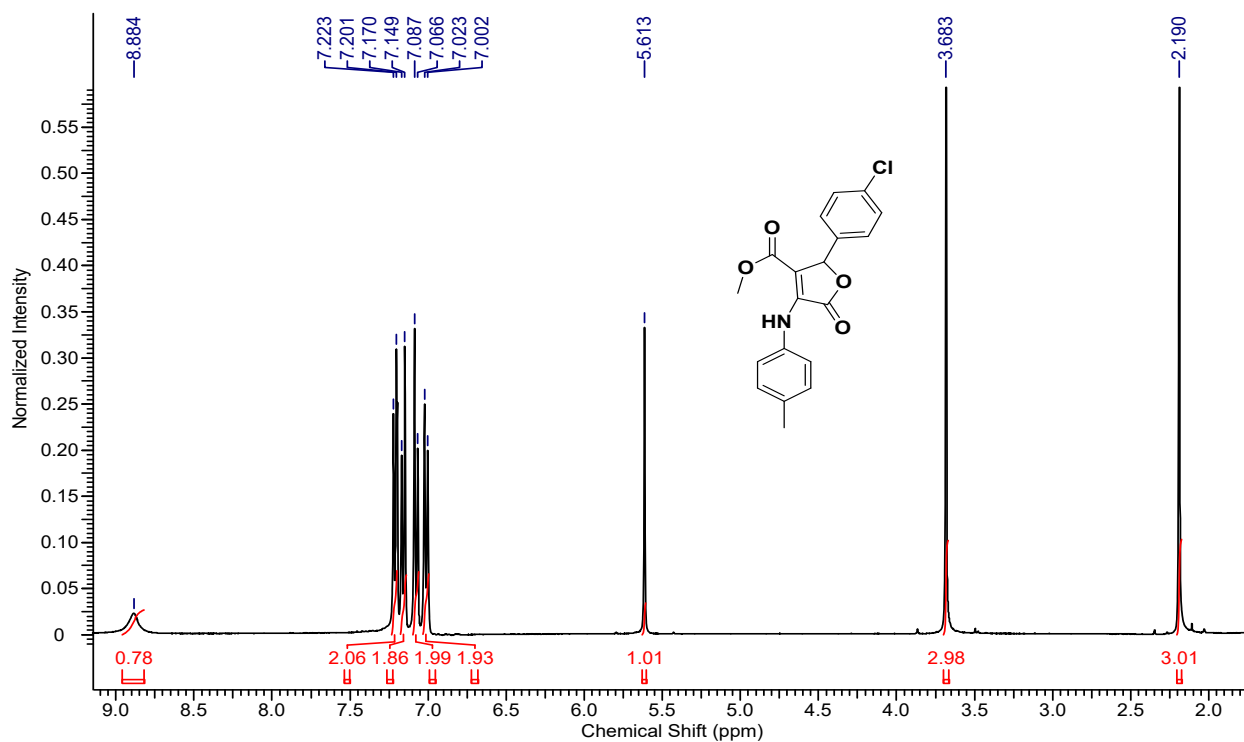<sup>13</sup>C NMR Spectrum of compound **4s**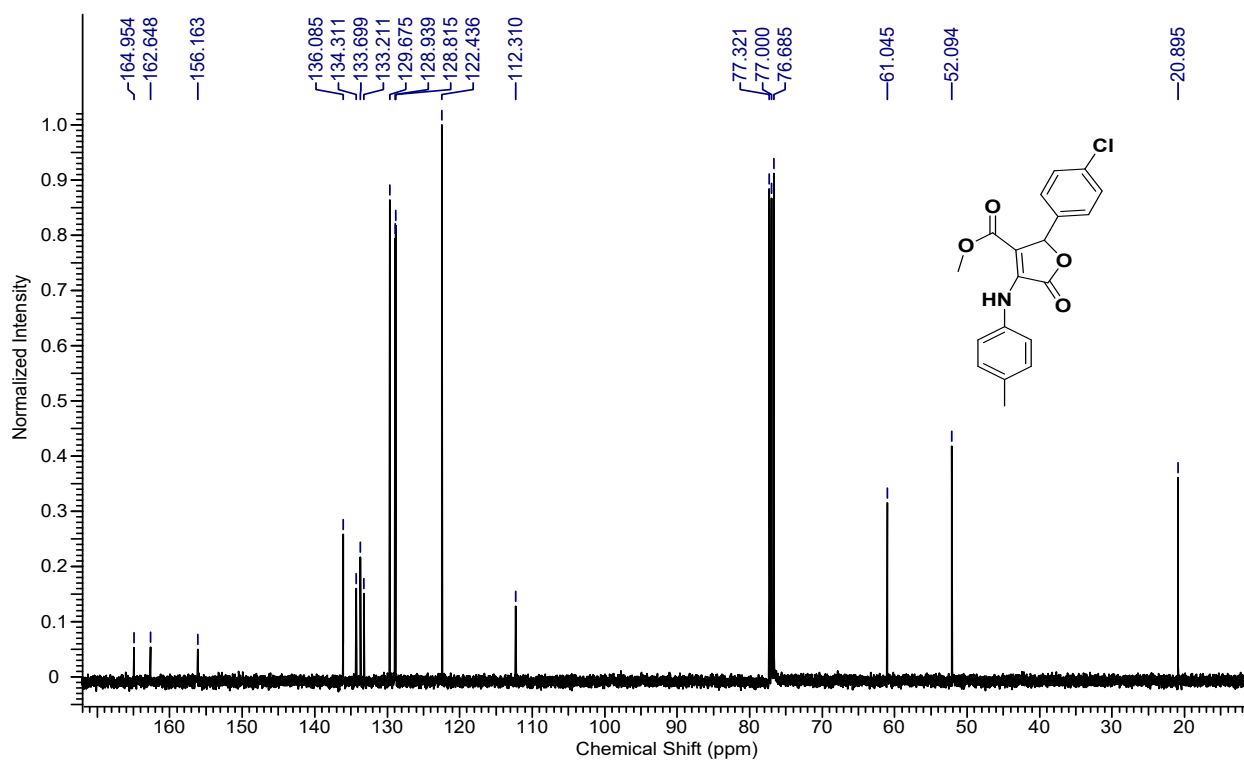<sup>1</sup>H NMR Spectrum of compound **4t**

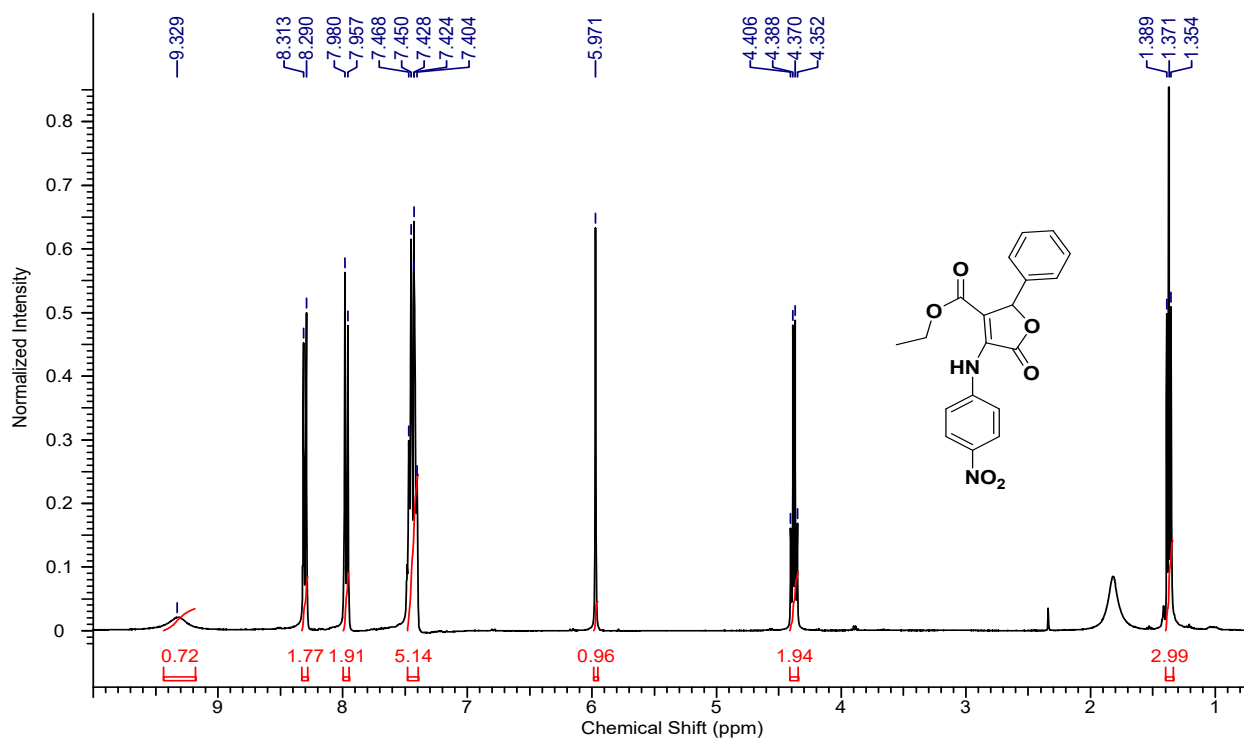<sup>13</sup>C NMR Spectrum of compound **4t**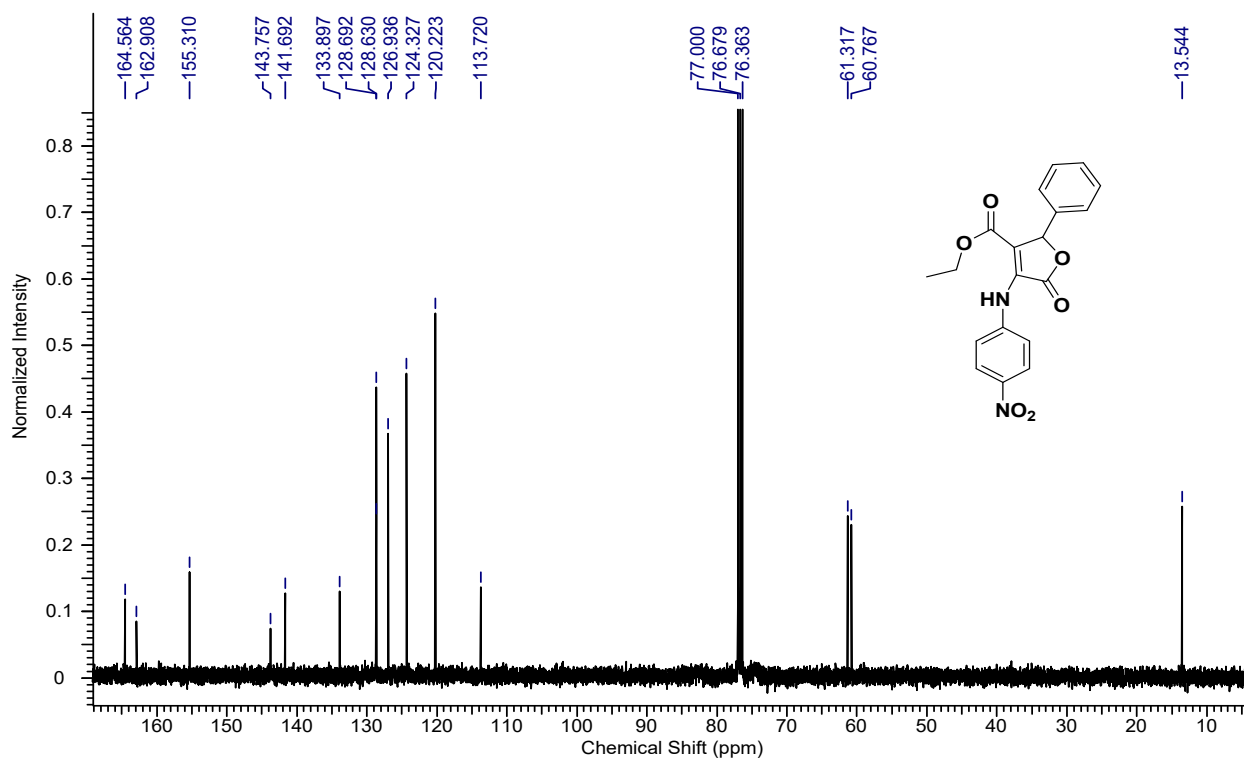<sup>1</sup>H NMR Spectrum of compound **4u**

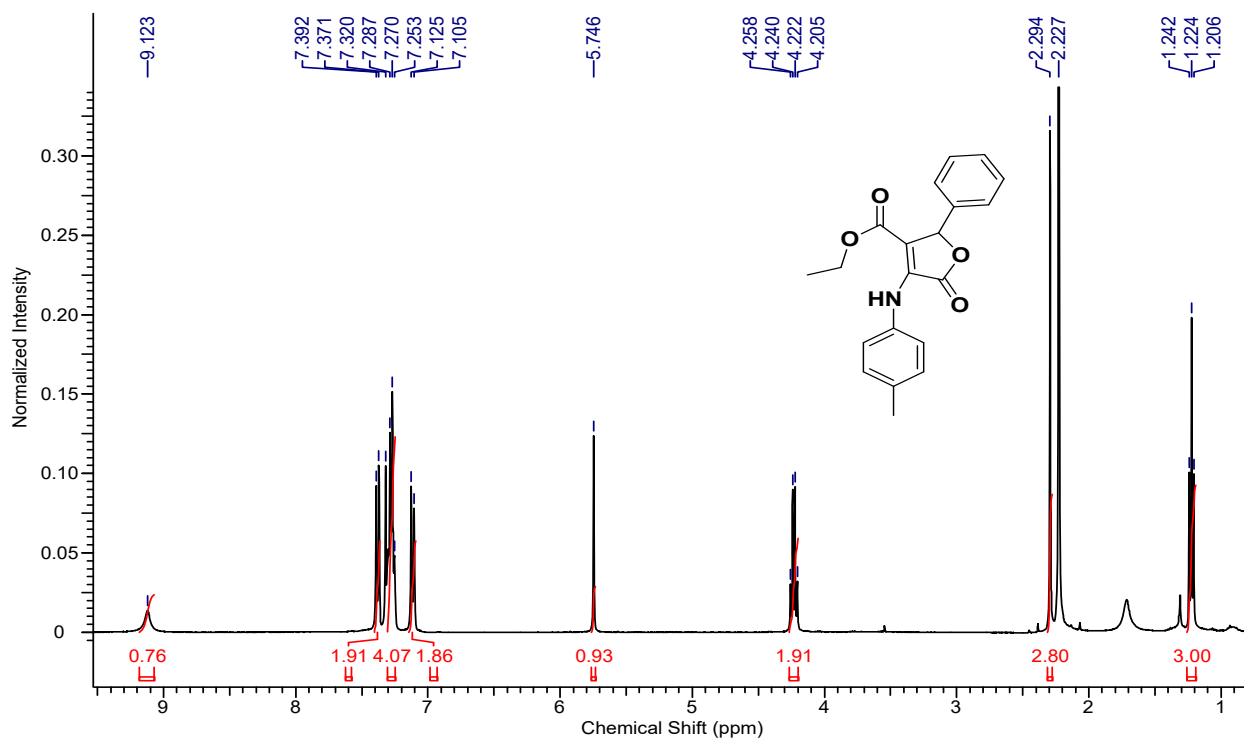<sup>13</sup>C NMR Spectrum of compound **4u**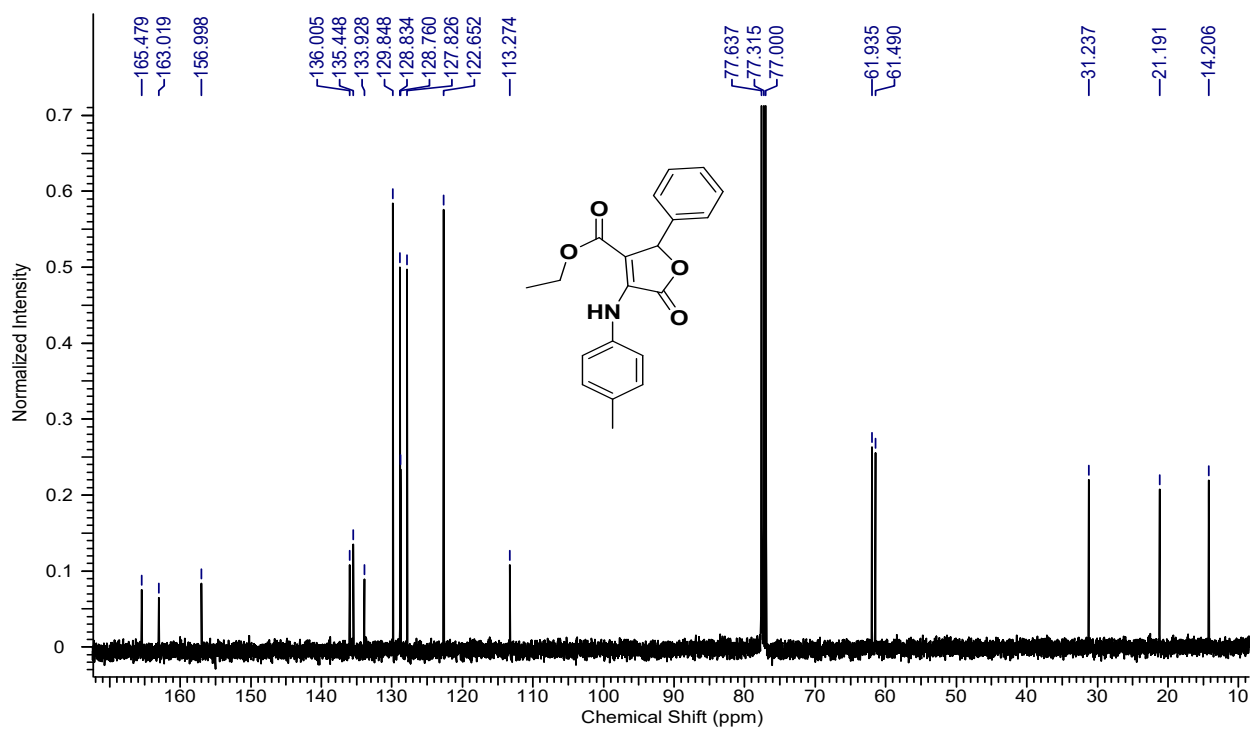<sup>1</sup>H NMR Spectrum of compound **4v**

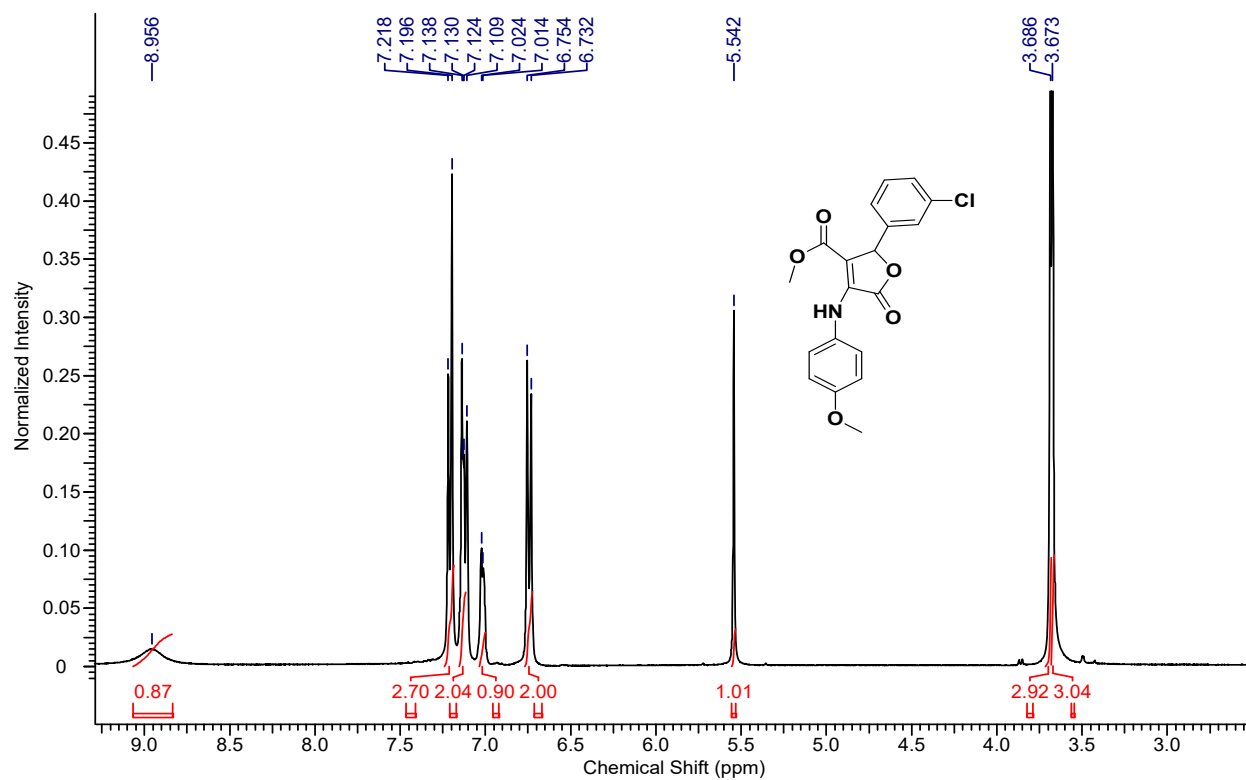<sup>13</sup>C NMR Spectrum of compound 4v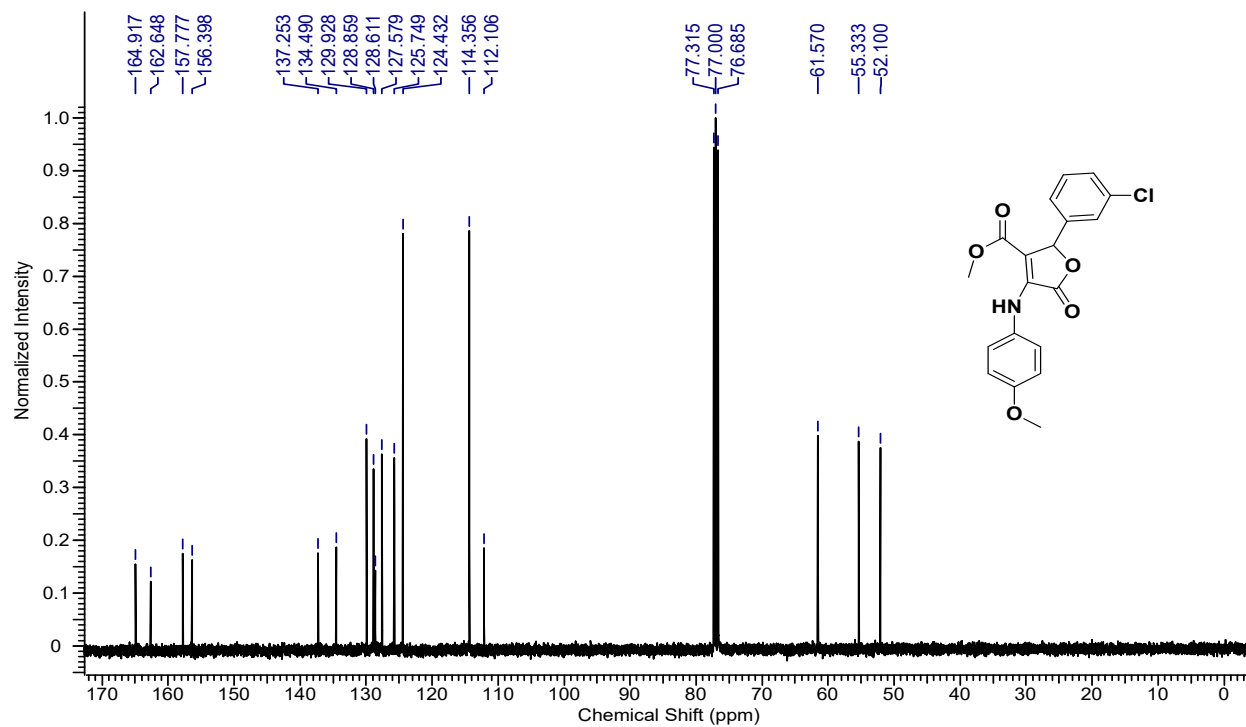<sup>1</sup>H NMR Spectrum of compound 3a BINPT

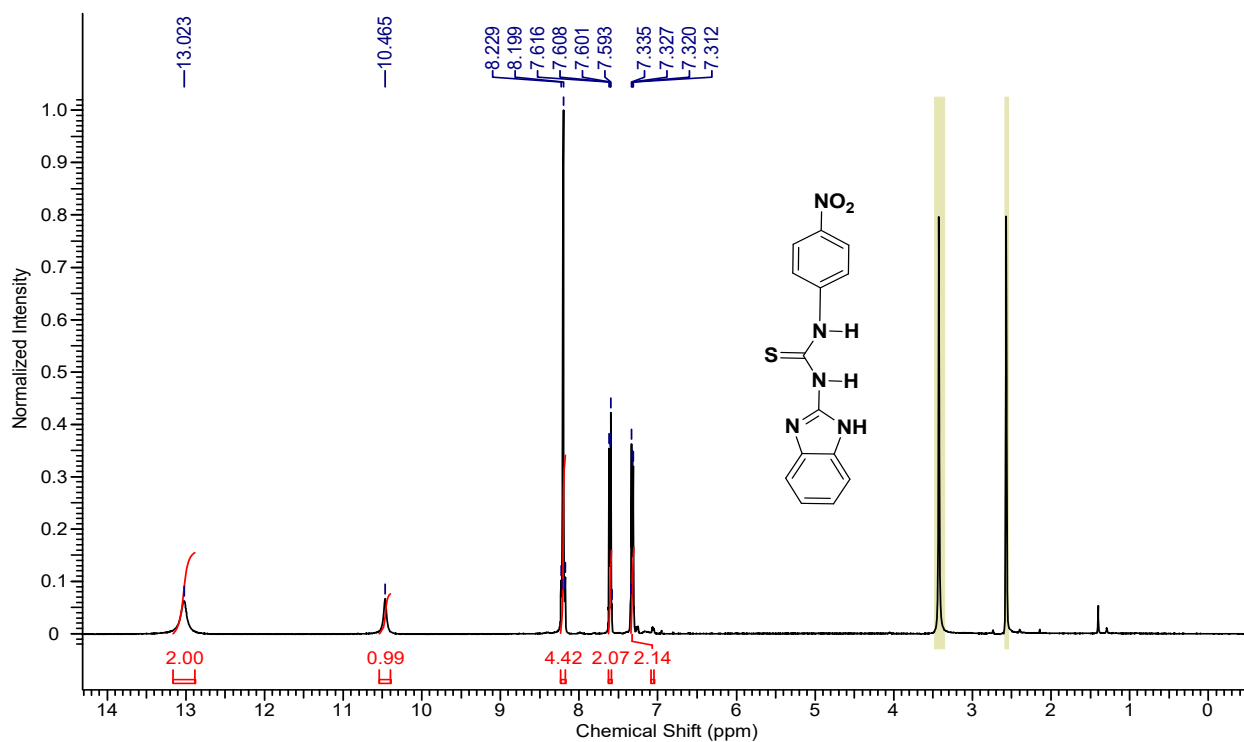

**<sup>13</sup>C NMR Spectrum of compound 3a BINPT**

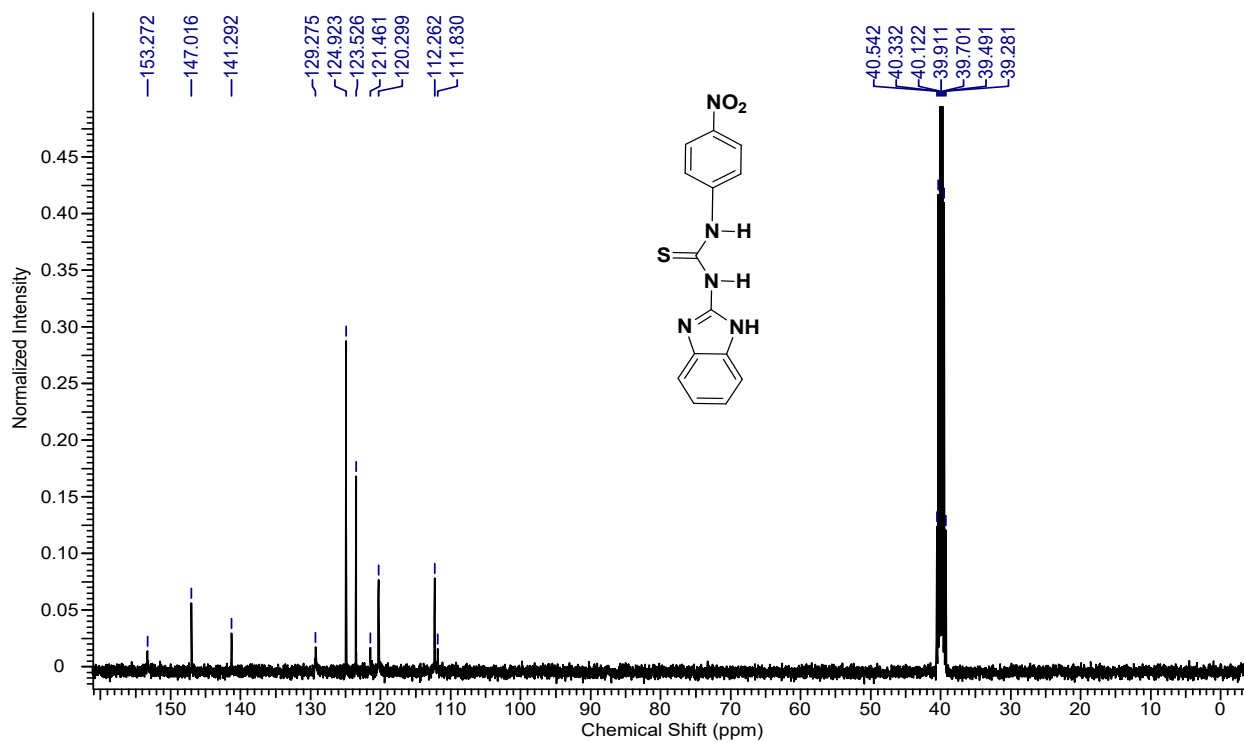

**<sup>1</sup>H NMR Spectrum of compound 3b MBNPT**



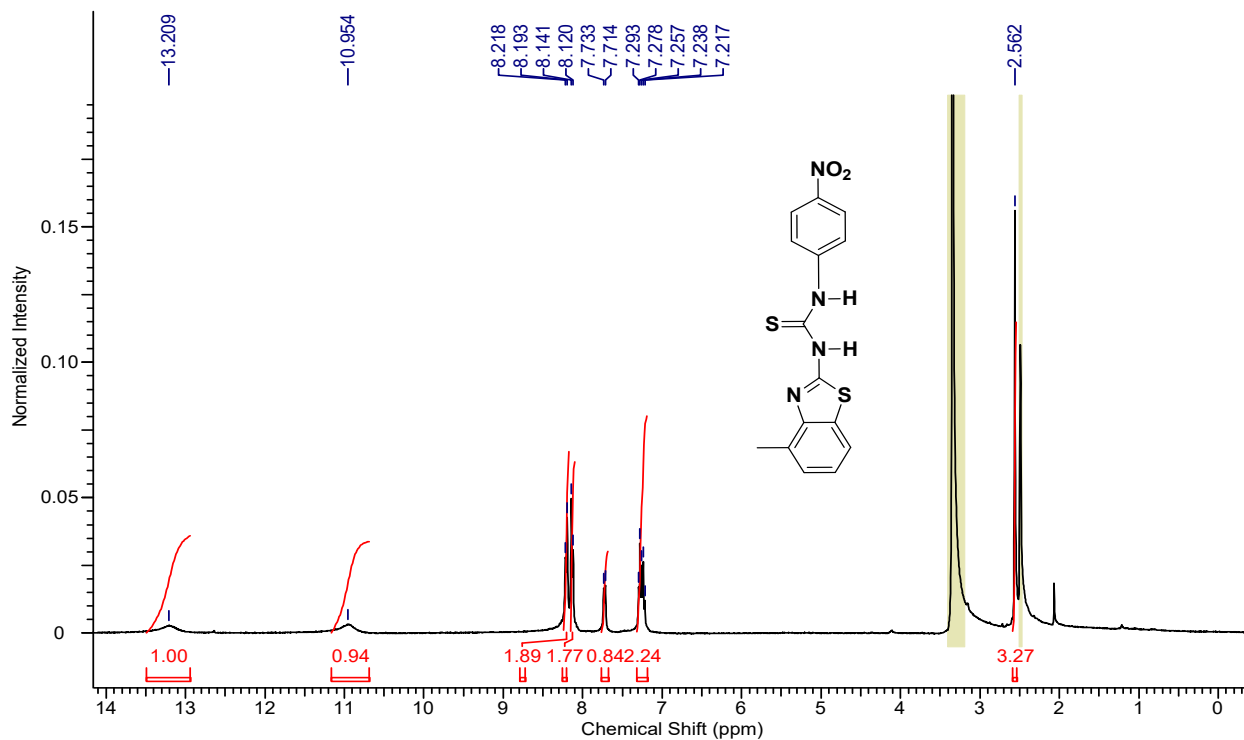

**<sup>13</sup>C NMR Spectrum of compound 3b MBNPT**

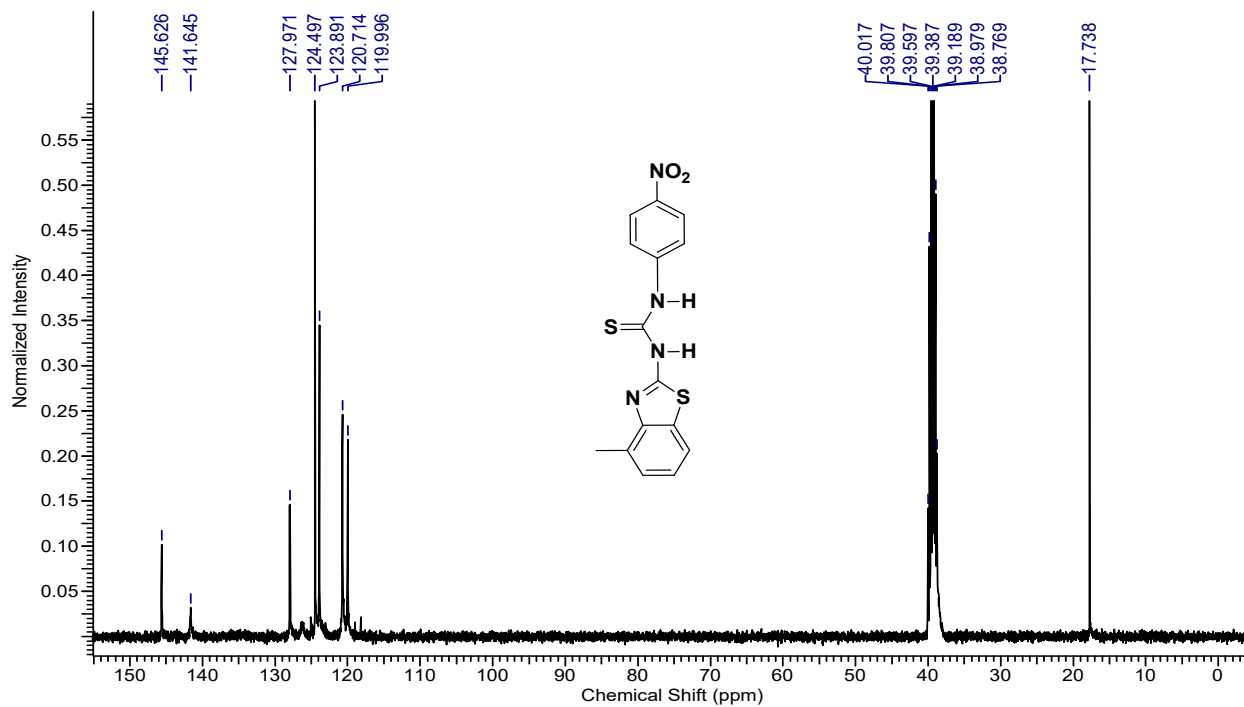

**<sup>1</sup>H NMR Spectrum of compound (NPTT)**

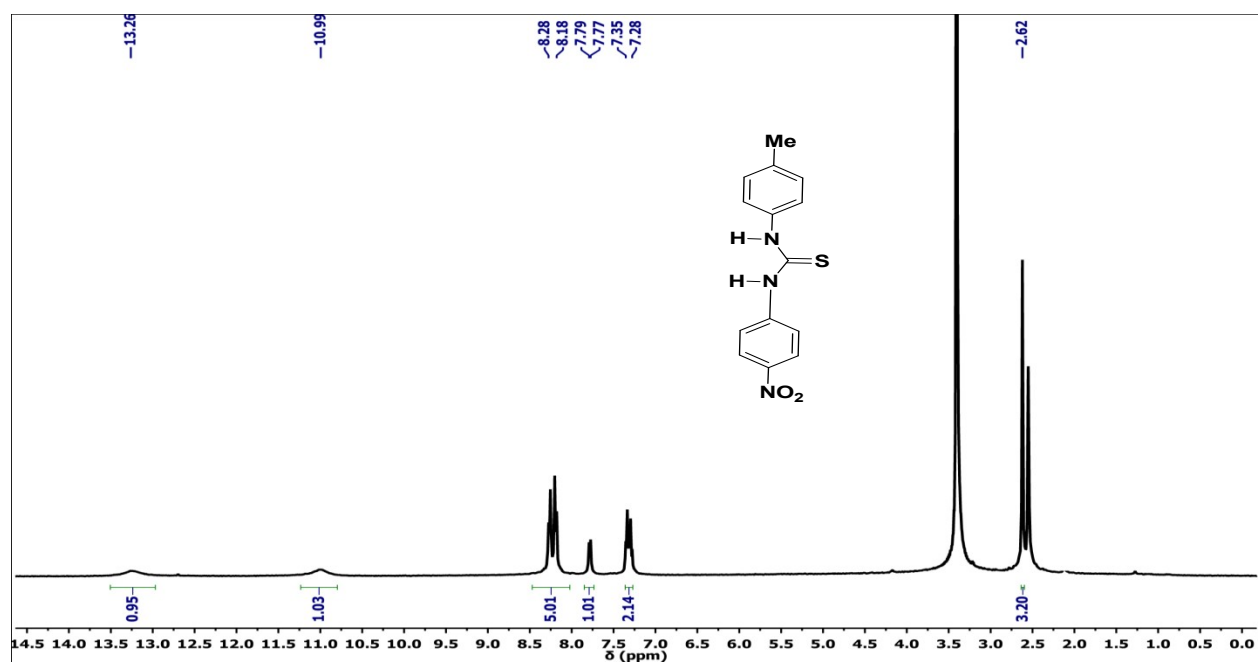

<sup>13</sup>C NMR Spectrum of compound (NPTT)

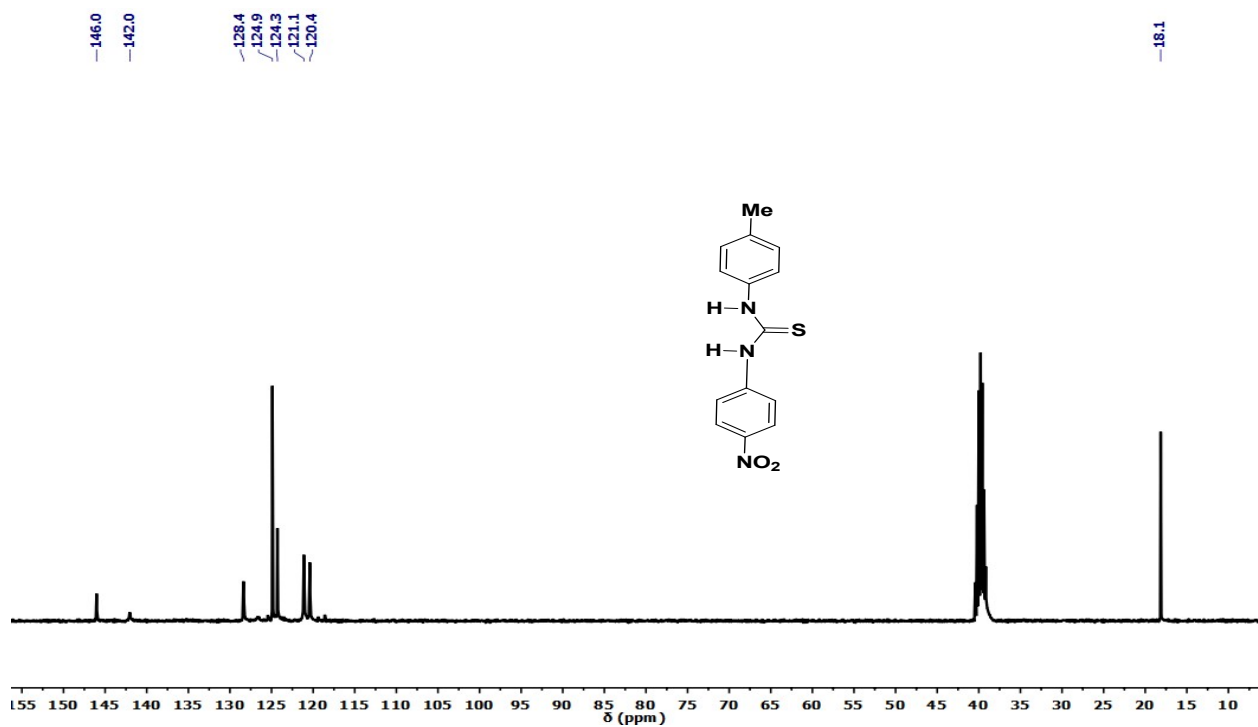

## X. Mass spectra of the synthesized compounds

## High resolution mass spectrum of compound 4a

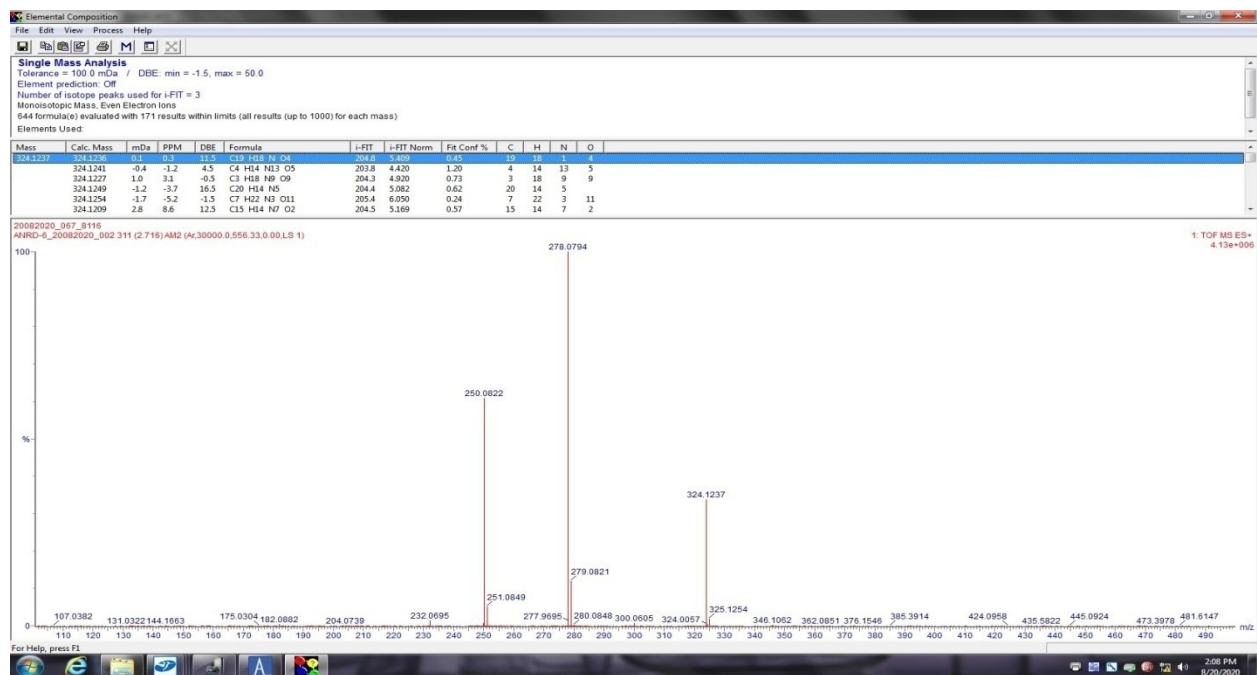

## Mass spectrum of compound 4c

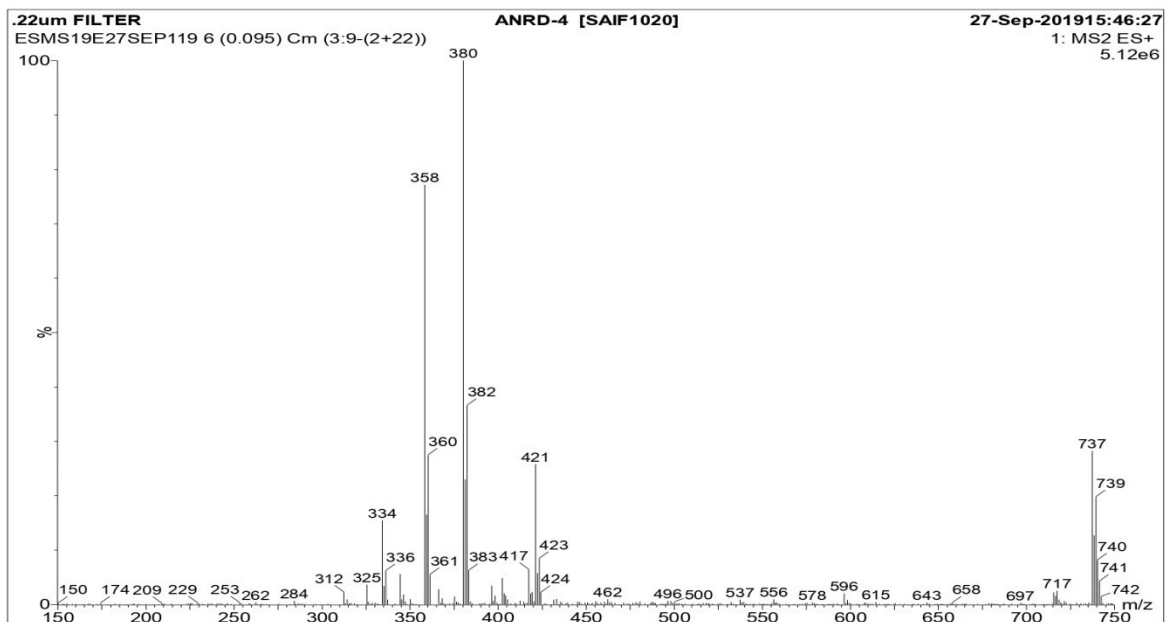

## Mass spectrum of compound 4e

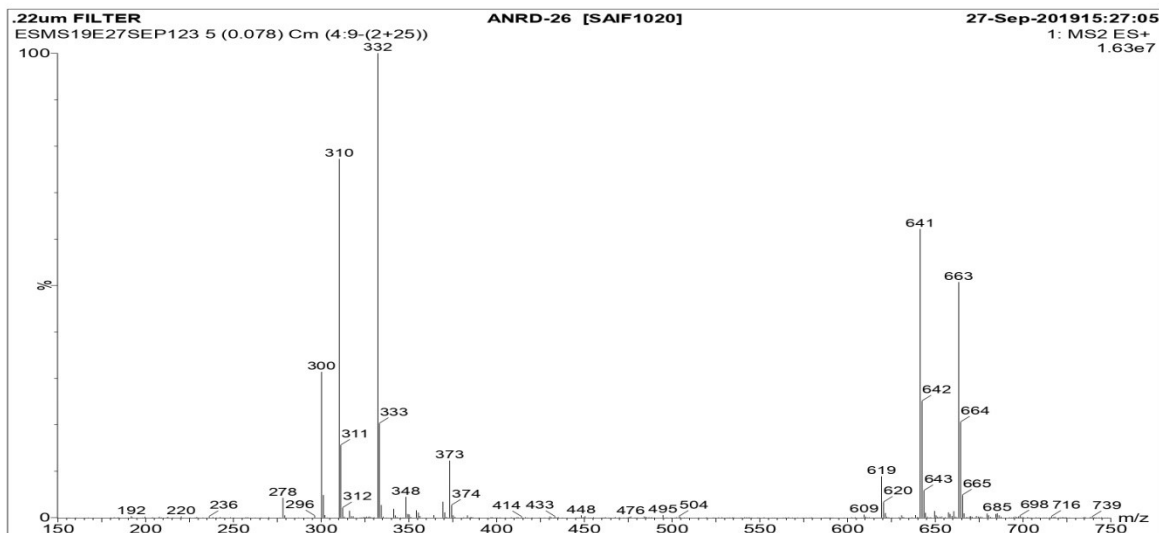High resolution mass spectrum of compound **4f**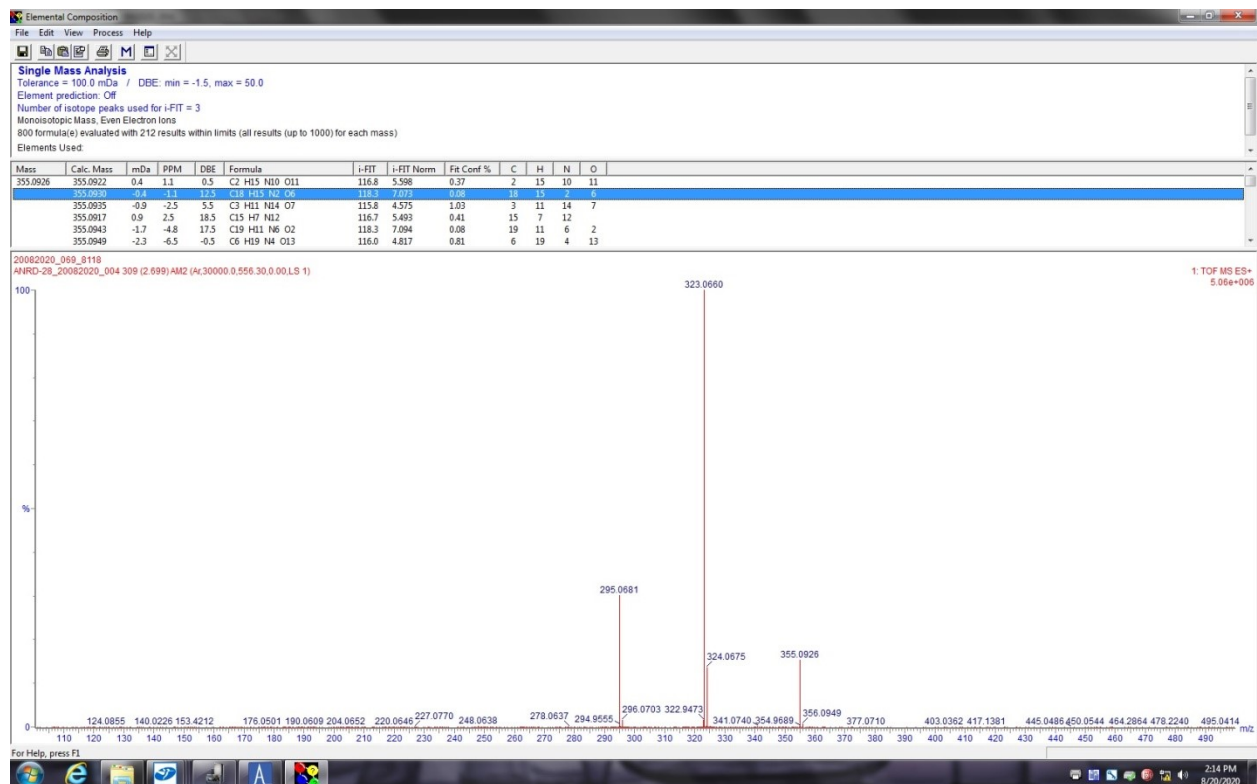Mass spectrum of compound **4h**

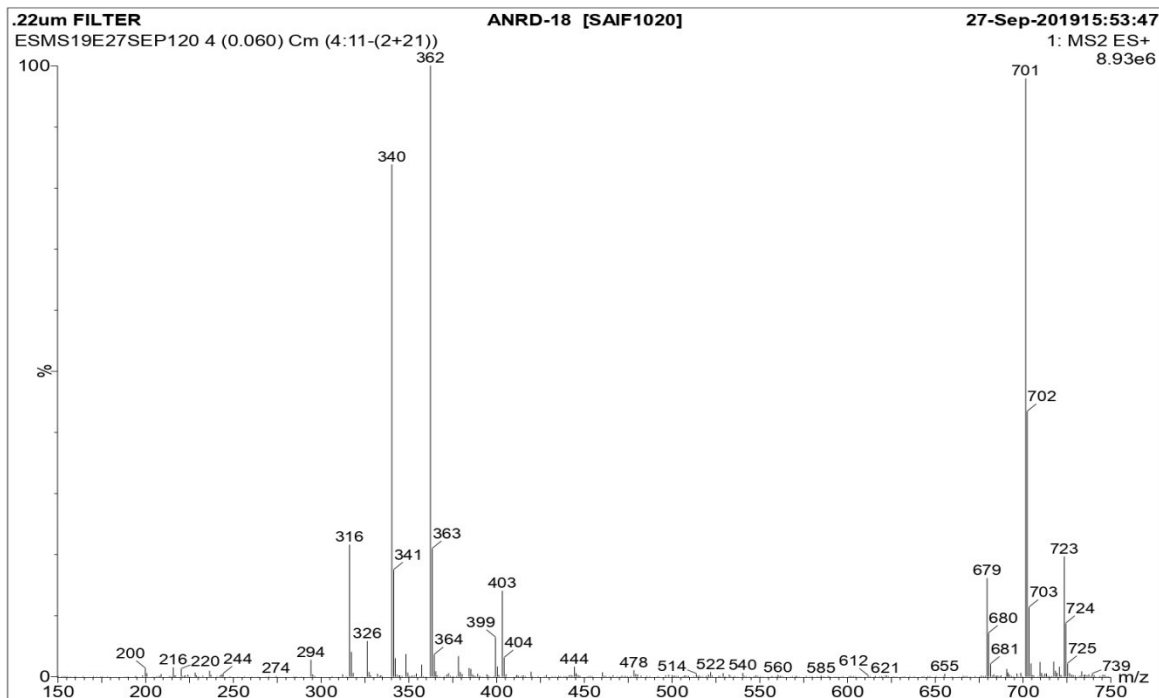High resolution mass spectrum of compound **4i**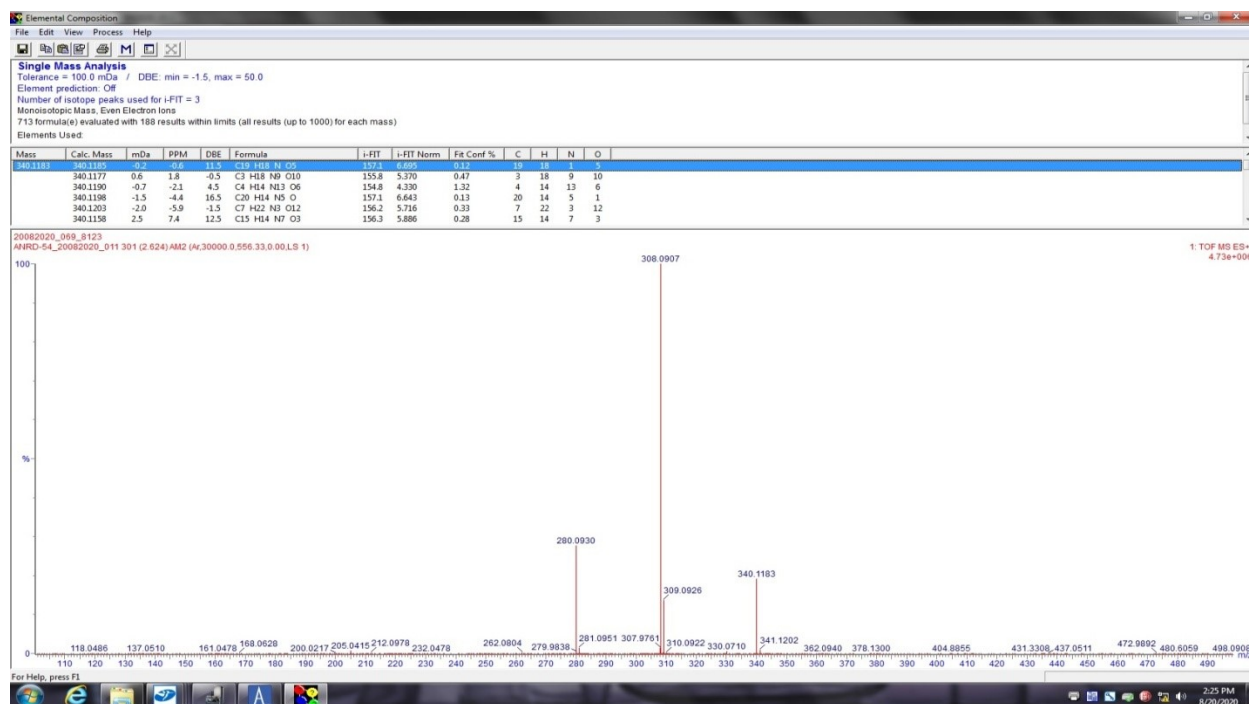High resolution mass spectrum of compound **4m**

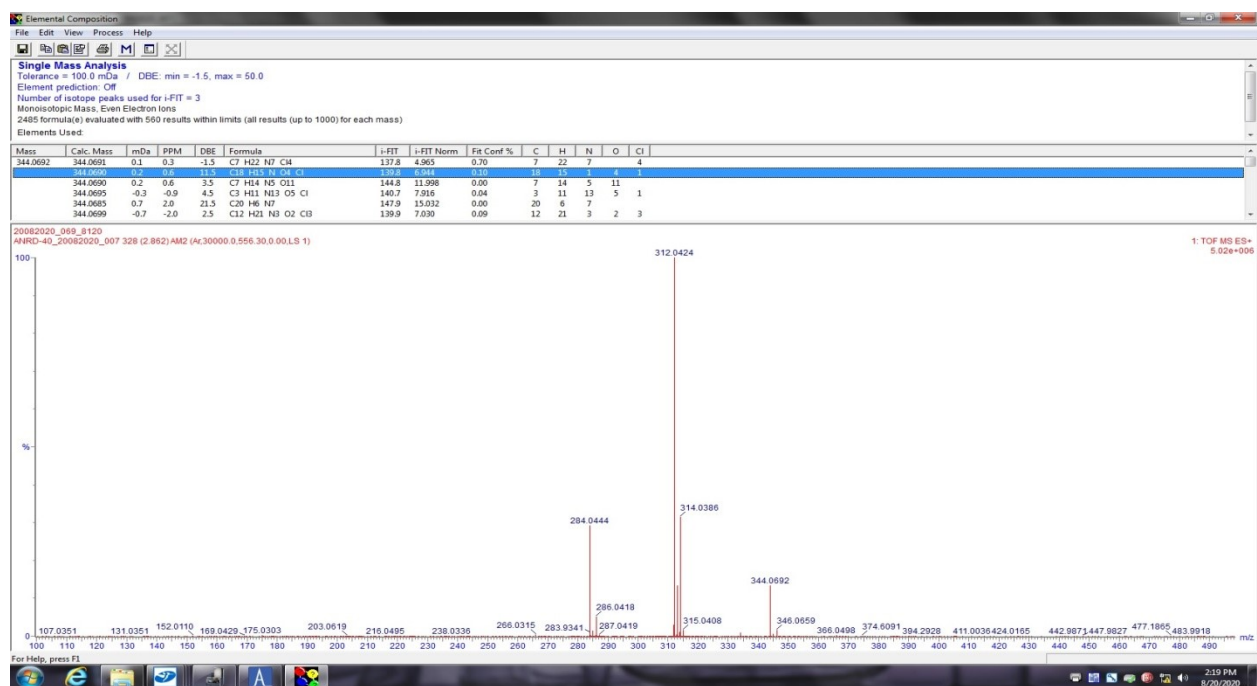High resolution mass spectrum of compound **4n**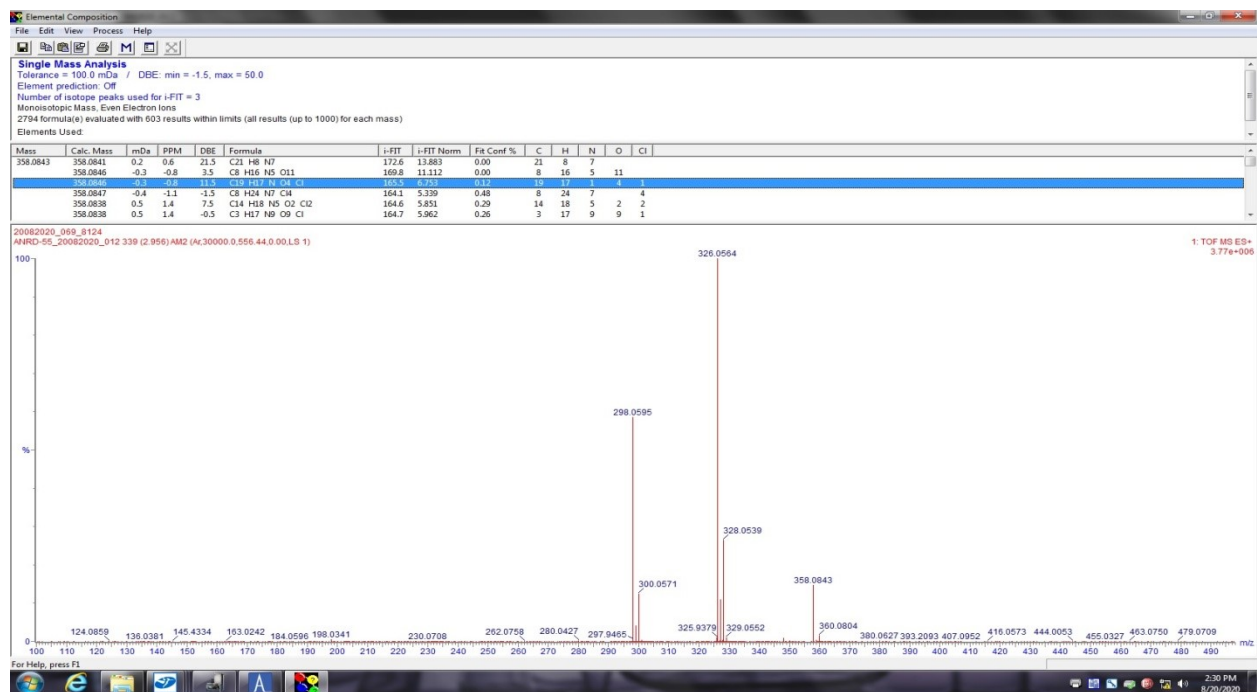High resolution mass spectrum of compound **4t**

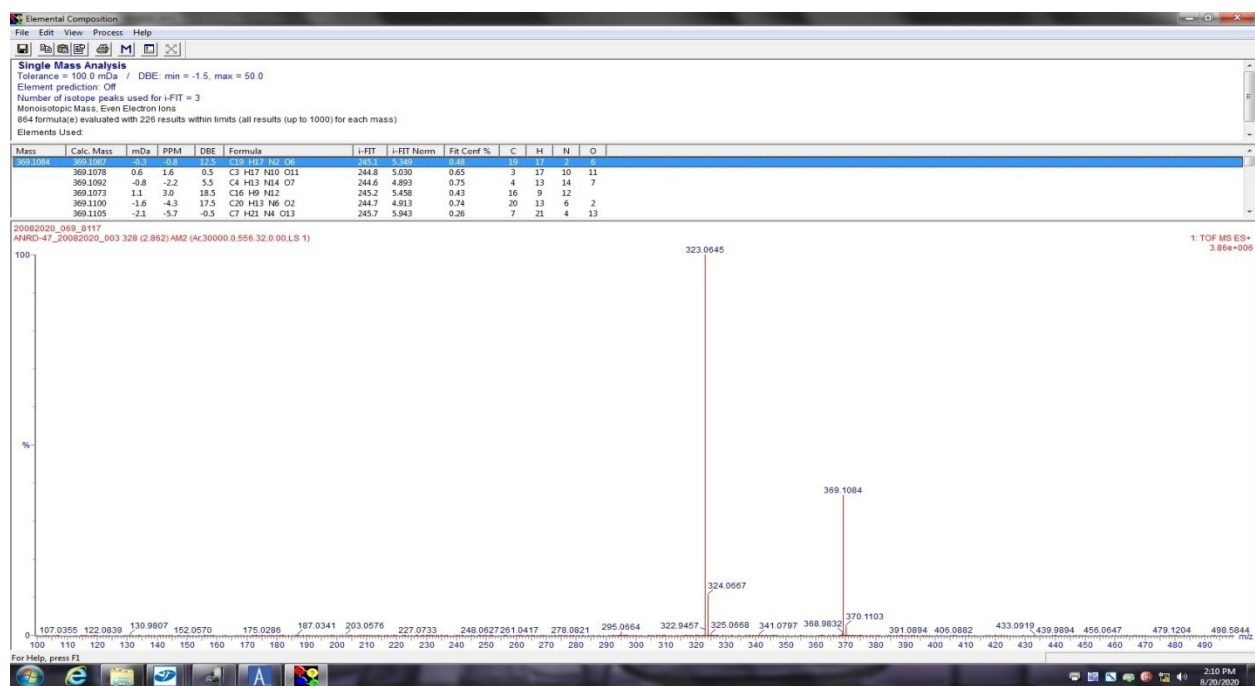

High resolution mass spectrum of compound 4v

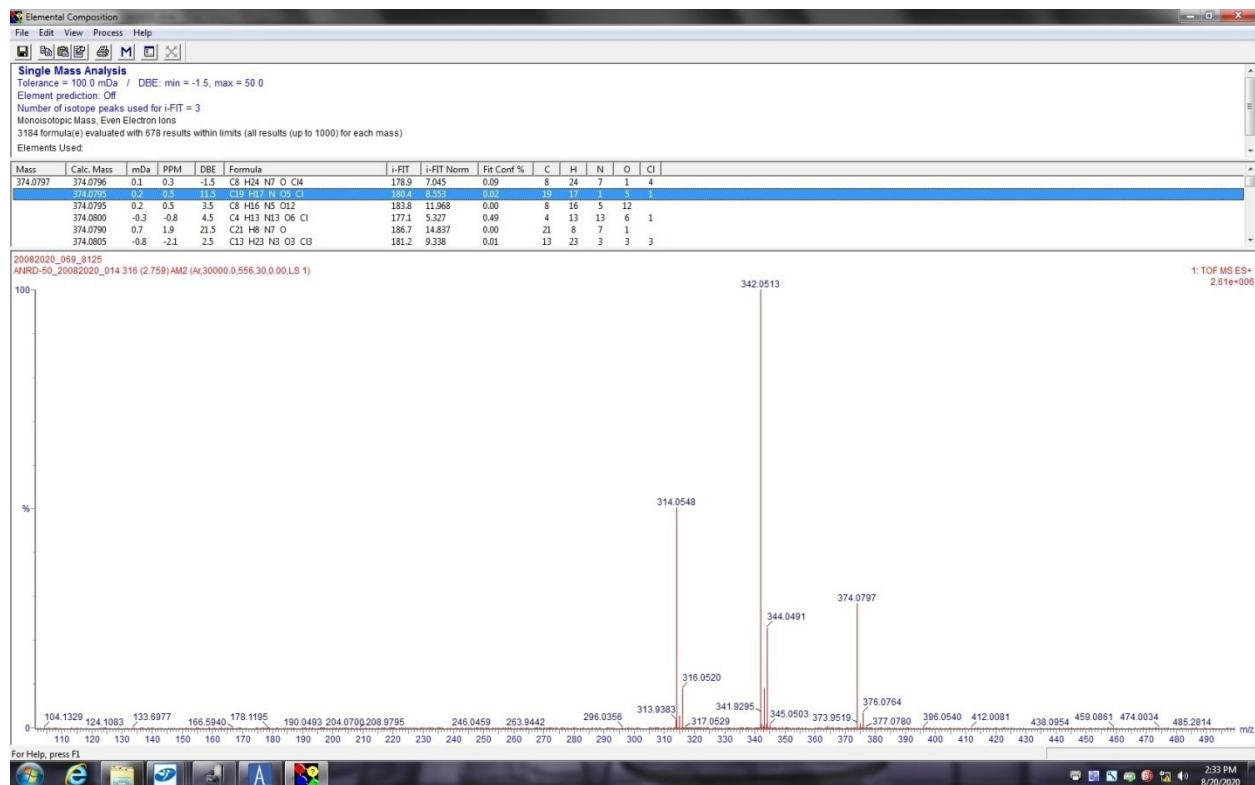

## XI. References (cited in SI)

- S1. S. K. Patra, B. Sen, S. K. Sheet, B. Banerjee, N. Saha and S. Khatua, *Inorg. Chim. Acta*, 2019, **492**, 119–130.
- S2. A. Khalafi-Nezhad, S. Sarikhani, E. S. Shahidzadeh and F. Panahi, *Green Chem.*, 2012, **14**, 2876.
- S3. A. D. Becke, *J. Chem. Phys.*, 1993, **98**, 5648-5652.
- S4. D. Sajan, L. Joseph, N. Vijayan and M. Karabacak. *Spectrochim. Acta Part A Mol. Biomol. Spectrosc.*, 2011, **81**, 85e98.
